# Supplementary material for: Timing of respiratory virus molecular testing in emergency departments and its association with patient care outcomes: a retrospective observational study across six Australian hospitals
Source: PubMed Central journal article supplement — BMJ Open. 2019 Aug 8;9(8):e030104. doi: 10.1136/bmjopen-2019-030104 (PMC6701571; doi:10.1136/bmjopen-2019-030104), 2019-08-08
Supplement: bmjopen-2019-030104.draft_revisions.pdf [file bmjopen-2019-030104.draft_revisions.pdf]

# BMJ Open

BMJ Open is committed to open peer review. As part of this commitment we make the peer review history of every article we publish publicly available.

When an article is published we post the peer reviewers' comments and the authors' responses online. We also post the versions of the paper that were used during peer review. These are the versions that the peer review comments apply to.

The versions of the paper that follow are the versions that were submitted during the peer review process. They are not the versions of record or the final published versions. They should not be cited or distributed as the published version of this manuscript.

BMJ Open is an open access journal and the full, final, typeset and author-corrected version of record of the manuscript is available on our site with no access controls, subscription charges or pay-per-view fees (<http://bmjopen.bmj.com>).

If you have any questions on BMJ Open's open peer review process please email [info.bmjopen@bmj.com](mailto:info.bmjopen@bmj.com)

# BMJ Open

## The timing of respiratory virus molecular testing in emergency departments and its association with patient care outcomes

|                               |                                                                                                                                                                                                                                                                                                                                                                                                                                                                                                                                                                                                                                                                                                                                                                                                                                                                                                                                                                                                       |
|-------------------------------|-------------------------------------------------------------------------------------------------------------------------------------------------------------------------------------------------------------------------------------------------------------------------------------------------------------------------------------------------------------------------------------------------------------------------------------------------------------------------------------------------------------------------------------------------------------------------------------------------------------------------------------------------------------------------------------------------------------------------------------------------------------------------------------------------------------------------------------------------------------------------------------------------------------------------------------------------------------------------------------------------------|
| Journal:                      | <i>BMJ Open</i>                                                                                                                                                                                                                                                                                                                                                                                                                                                                                                                                                                                                                                                                                                                                                                                                                                                                                                                                                                                       |
| Manuscript ID                 | bmjopen-2019-030104                                                                                                                                                                                                                                                                                                                                                                                                                                                                                                                                                                                                                                                                                                                                                                                                                                                                                                                                                                                   |
| Article Type:                 | Research                                                                                                                                                                                                                                                                                                                                                                                                                                                                                                                                                                                                                                                                                                                                                                                                                                                                                                                                                                                              |
| Date Submitted by the Author: | 28-Feb-2019                                                                                                                                                                                                                                                                                                                                                                                                                                                                                                                                                                                                                                                                                                                                                                                                                                                                                                                                                                                           |
| Complete List of Authors:     | Wabe, Nasir; Macquarie University, Centre for Health Systems and Safety Research, Australian Institute of Health Innovation<br>Li, Ling; Macquarie University, Centre for Health Systems and Safety Research, Australian Institute of Health Innovation<br>Dahm, Maria; Macquarie University, Centre for Health Systems and Safety Research, Australian Institute of Health Innovation<br>Lindeman, Robert; NSW Health Pathology<br>Yimsung, Ruth; NSW Health Pathology<br>Clezy, Kate; Prince of Wales Hospital, Infectious Diseases Department<br>Thomas, Judith; Macquarie University, Centre for Health Systems and Safety Research, Australian Institute of Health Innovation<br>Varndell, Wayne ; Prince of Wales Hospital<br>Westbrook, Johanna; Macquarie University, Centre for Health Systems and Safety Research, Australian Institute of Health Innovation<br>Georgiou, A; Macquarie University, Centre for Health Systems and Safety Research, Australian Institute of Health Innovation |
| Keywords:                     | Diagnostic microbiology < INFECTIOUS DISEASES, Infection control < INFECTIOUS DISEASES, Molecular diagnostics < INFECTIOUS DISEASES                                                                                                                                                                                                                                                                                                                                                                                                                                                                                                                                                                                                                                                                                                                                                                                                                                                                   |
|                               |                                                                                                                                                                                                                                                                                                                                                                                                                                                                                                                                                                                                                                                                                                                                                                                                                                                                                                                                                                                                       |

SCHOLARONE™  
Manuscripts

1  
2  
3 **The timing of respiratory virus molecular testing in emergency departments and its**  
4 **association with patient care outcomes**  
5  
6  
7

8 **Authors:** Nasir Wabe<sup>1\*</sup>, Ling Li<sup>1</sup>, Mary R Dahm<sup>1</sup>, Robert Lindeman<sup>2</sup>, Ruth Yimsung<sup>2</sup>, Kate  
9 Clezy<sup>3</sup>, Judith Thomas<sup>1</sup>, Wayne Varndell<sup>4,5</sup>, Johanna I Westbrook<sup>1</sup>, Andrew Georgiou<sup>1</sup>  
10  
11  
12

13 **Authors Affiliations:**  
14

15  
16 <sup>1</sup>Centre for Health Systems and Safety Research, Australian Institute of Health Innovation,  
17 Macquarie University, North Ryde NSW 2109, Australia;  
18

19  
20 <sup>2</sup>NSW Health Pathology, Chatswood NSW 2067, Australia;  
21

22  
23 <sup>3</sup>Infectious Diseases Department, Prince of Wales Hospital, Randwick NSW 2031, Australia;  
24

25  
26 <sup>4</sup>Emergency Department, Prince of Wales Hospital, Randwick NSW 2031, Australia;  
27

28  
29 <sup>5</sup>Faculty of Health, University of Technology Sydney, Australia  
30  
31

32 **\*Corresponding Author**  
33

34  
35 **Address:** Centre for Health Systems and Safety Research, Australian Institute of Health  
36 Innovation, Macquarie University, North Ryde NSW 2109, Australia  
37

38  
39 **T:** +61 (2) 9850 2442 | **M:** + 61 470 771 915  
40

41  
42 **F:** +61 (2) 9850 2499 | **E:** [nasir.wabe@mq.edu.au](mailto:nasir.wabe@mq.edu.au)  
43  
44

45 **Running Title:** The timing of respiratory virus testing and patient outcomes in ED  
46  
47

48 **Key words:** Influenza, timing of testing, rapid PCR, molecular diagnostic, respiratory virus  
49  
50

51 **Word count:** 2,573  
52

53  
54 **Word count abstract:** 278  
55

56  
57 **Total number of figures and table:** 4 tables and 1 figure  
58  
59  
60

## Abstract

**Objective:** A rapid molecular diagnostic test (RMDT) offers a fast and accurate detection of respiratory viruses, but its impact on the timeliness of care in the emergency department (ED) may depend on the timing of the test. The aim of the study was to determine if the timing of respiratory virus testing using a RMDT in the ED had an association with patient care outcomes.

**Design:** Retrospective observational study.

**Setting:** Linked ED and laboratory data from six EDs in New South Wales, Australia.

**Participants:** Adult patients presenting to EDs during the 2017 influenza season and tested for respiratory viruses using a RMDT. The timing of respiratory virus testing was defined as the time from a patient's ED arrival to time of sample receipt at the hospital laboratory.

**Outcome measures:** ED length of stay (LOS), >4-hour ED LOS and having a pending RMDT result at ED disposition.

**Results:** A total of 2168 patients were included. The median timing of respiratory virus testing was 224 minutes (inter-quartile range, 133-349). Every 30-minute increase in the timing of respiratory virus testing was associated with a 24.0-minute increase in the median ED LOS (95% confidence interval [CI], 21.8-26.1;  $P < 0.001$ ), a 51% increase in the likelihood of staying >4 hours in ED (odds ratio [OR], 1.51; 95% CI, 1.41-1.63;  $P < 0.001$ ) and a 4% increase in the likelihood of having a pending RMDT result at ED disposition (OR, 1.04; 95% CI, 1.02-1.05;  $P < 0.001$ ) after adjustment for confounders.

**Conclusion:** The timing of respiratory virus molecular testing in EDs was significantly associated with a range of outcome indicators. Results suggest the potential to maximise the benefits of RMDT by introducing an early diagnostic protocol such as triage-initiated testing.

### Strengths and limitations of this study

- This is a retrospective observational study conducted across six EDs in Australia.
- It is the first study to assess the link between the timing of RMDT and patient outcomes in EDs.
- Data were obtained by linking the ED and laboratory information system datasets.
- Introducing an early diagnostic protocol such as ED triage-initiated testing may maximise the benefits of RMDTs.

## Introduction

The accurate diagnosis of the cause of respiratory infections has over recent years depended on a molecular method using a multiplex polymerase chain reaction (PCR) panel testing. Multiplex PCR provides accurate diagnoses, but has been traditionally performed in a central laboratory with a lengthy test turnaround time (TAT), and with major repercussions for the efficiency of emergency department (ED) workflows and care processes.

ED overcrowding has been recognized as a growing problem in Australia and worldwide, contributing to deficits in the performance of the health system.<sup>1-3</sup> Delay in laboratory test results is often considered as one of many factors contributing to ED overcrowding and prolonged ED length of stay (LOS).<sup>4-6</sup> Fast result availability through the use of rapid diagnostic tests can potentially improve patient flow and lessen the burden of ED overcrowding.<sup>7,8</sup> Optimising patient flow is of particular importance given the 4-hour ED LOS target introduced in Australia in 2011 to improve the quality and timeliness of care across EDs.<sup>9</sup> Diagnostic kits for the rapid diagnosis of respiratory viruses using a molecular PCR-based technology are now available for use in hospital-based laboratories. Existing evidence shows that RMDT in ED is associated with a significant decrease in hospital admissions<sup>8,10</sup>, shorter TAT<sup>8</sup> and reductions in hospital resource utilisation.<sup>11-13</sup> However, evidence of the association between RMDT and ED LOS have been inconsistent.<sup>8,14,15</sup> Our previous study did not detect a significant association between RMDT use and ED LOS.<sup>16</sup> We hypothesised that this may be due to the fact that RMDT ordering took place a median of three hrs after a patient's ED arrival<sup>16</sup> suggesting that the impact of RMDT on ED LOS and other timeliness of care processes may depend on the timing of the test.

The aim of the study was to determine if the timing of respiratory virus testing using RMDT in ED is associated with indicators related to timeliness of patient care including ED LOS,

meeting the 4-hr ED LOS Australian emergency access target; having a pending RMDT result at ED disposition.

## Method

### Setting

A retrospective observational study was conducted across six public hospitals in New South Wales (NSW), Australia. All study sites provide 24-hour EDs: three principal referral hospitals (EDs A, B and D) with 76,228, 54,443 and 61,348 annual ED presentations respectively, two acute group A hospitals (ED C and ED F) with 50,025 and 38,039 annual ED presentations respectively and one public acute group A hospital (ED E) with 29,479 annual ED presentations (2016 data).<sup>17</sup>

### Population

The study period was the 2017 influenza season, between 1 July and 31 October. The inclusion criteria were patients presenting to EDs with symptoms of respiratory infection and aged  $\geq 18$  years; Australasian triage scale categories of 3 (potentially life-threatening), 4 (potentially serious) or 5 (less urgent) and tested for respiratory viruses at a hospital-based laboratory using a RMDT. The RMDT used in this study was a Cepheid Xpert® Flu/RSV XC (Cepheid, Sunnyvale, CA). The Cepheid Xpert® Flu/RSV XC assay demonstrated a high sensitivity and specificity for rapid detection of influenza A, influenza B and RSV and RSV.<sup>18</sup>

Patients with triage categories of 1 (immediately life-threatening) or 2 (imminently life-threatening) were excluded from the current analysis as patients required urgent medical assessment and treatment. Relevant patient presentation characteristics and laboratory test data were obtained by linking the ED and laboratory information system datasets.<sup>6</sup>

### Outcome measures

1  
2  
3 The primary outcome was ED LOS. ED LOS was defined as the length of time between ED  
4 arrival and patient disposition. The secondary outcomes included >4-hour ED LOS and having  
5 a pending RMDT result at ED disposition. A pending test result was defined as the  
6 unavailability of a verified RMDT result at the time of patient disposition from the ED.<sup>19</sup>  
7  
8  
9  
10  
11  
12

### 13 **Statistical analysis**

14  
15  
16 Descriptive statistics including medians with inter-quartile ranges (IQR) were reported. The  
17 RMDT TAT was defined as the time of sample receipt at the hospital laboratory to time of  
18 availability of RMDT result. The exploratory variable was the timing of respiratory virus  
19 testing using a RMDT, defined as the time from a patient's ED arrival to time of sample receipt  
20 at the hospital laboratory. For result interpretation purposes, the relationship between the  
21 timing of the RMDT and study outcomes were estimated for every 30-minute increase in the  
22 timing of the test.  
23  
24  
25  
26  
27  
28  
29  
30  
31  
32

33 The association between the timing of the RMDT and ED LOS was assessed using a median  
34 regression. As the ED LOS data were highly skewed, commonly used approaches such as  
35 ordinary least squares regression which models the conditional mean of the outcome variable  
36 was not appropriate methods.<sup>20</sup> Median regression is a special type of quantile regression which  
37 estimates the median of the outcome variable conditional on the values of the predictor  
38 variables.<sup>21</sup> It is robust to extreme values and therefore well suited for modelling such data.<sup>22</sup>  
39  
40  
41  
42  
43  
44  
45  
46

47 Binary logistic regression was used to assess the association between the timing of the RMDT  
48 and the secondary outcomes (e.g. >4-hour ED LOS, *yes/no*). The strength of the associations  
49 was measured using odds ratio (OR) with a 95% confidence interval (CI).  
50  
51  
52  
53

54 For all outcomes, the findings were reported for the overall sample and by study ED. Sub-  
55 group analyses by patient disposition and ED arrival time were also conducted. The baseline  
56 covariates included age, gender, triage category, arrival time, arrival day of week, mode of  
57  
58  
59  
60



1  
2  
3 arrival, patient disposition, overall number of tests ordered and number of test order episodes  
4  
5 (tests ordered at one point in time during the ED stay). All analyses were adjusted for potential  
6  
7 confounders – any variable having a significant association with a given outcome in a  
8  
9 univariate analysis ( $P < 0.05$ ) was selected for the multivariate model. P-values were 2-tailed  
10  
11 and  $P < 0.05$  was considered statistically significant. Analyses were conducted using Stata  
12  
13 version 15 (StataCorp LP, College Station, TX).  
14  
15

### 16 17 **Patient and public involvement**

18  
19 This study was conducted without patient and public involvement as it was a retrospective  
20  
21 study conducted using pre-existing administrative data. The patients were not invited to  
22  
23 comment on the study design and were not consulted to develop outcomes or interpret the  
24  
25 results. Patients were not invited to contribute to the writing or editing of this document for  
26  
27 readability or accuracy.  
28  
29  
30  
31

### 32 33 **Results**

#### 34 35 **Baseline characteristics**

36  
37 A total of 2,168 patients were included in the study. Table 1 presents baseline characteristics.  
38  
39 The median patient age was 74 years and 55.2% (n=1,196) were female (Table 1). Overall,  
40  
41 there were 16,321 pathology tests ordered (i.e. RMDT and other tests combined) with medians  
42  
43 of 3 test order episodes during the ED stay and 7 tests per patient. Analysis of RMDT results  
44  
45 showed that 28.9% (n=626) were positive for either influenza A/B (n=617) or RSV (n=9). No  
46  
47 patients tested positive for both influenza and RSV. The overall median TAT of RMDT was  
48  
49 183 minutes but this ranged from 104 minutes at ED A to 622 minutes at ED F.  
50  
51  
52  
53  
54

55  
56 **Table 1: Baseline characteristics.**

| Variables | Result (N=2,168) |
|-----------|------------------|
|-----------|------------------|

|                              |              |
|------------------------------|--------------|
| Gender, n (%)                |              |
| Male                         | 972 (44.8)   |
| Female                       | 1,196 (55.2) |
| Age (years), median (IQR)    | 74 (56-84)   |
| Triage scale, n (%)          |              |
| Category 3                   | 1,777 (82.0) |
| Category 4/5                 | 391(18.0)    |
| Arrival time, n (%)          |              |
| 0700hrs to 1900hrs           | 1,528 (70.5) |
| 1900hrs to 0700hrs           | 640 (29.5)   |
| Arrival day of week, n (%)   |              |
| Monday                       | 356 (16.4)   |
| Tuesday                      | 294 (13.6)   |
| Wednesday                    | 327 (15.1)   |
| Thursday                     | 300 (13.8)   |
| Friday                       | 308 (14.2)   |
| Saturday                     | 257 (11.9)   |
| Sunday                       | 326 (15.0)   |
| Mode of arrival, n (%)       |              |
| Private/public transport     | 906 (41.8)   |
| State ambulance <sup>1</sup> | 1,262 (58.2) |
| Study ED, n (%)              |              |
| A                            | 723 (33.4)   |
| B                            | 193 (8.9)    |

|                                     |              |
|-------------------------------------|--------------|
| C                                   | 301 (13.9)   |
| D                                   | 530 (24.5)   |
| E                                   | 239 (11.0)   |
| F                                   | 182 (8.4)    |
| Patient disposition, n (%)          |              |
| Admitted                            | 1,567 (72.3) |
| Discharged                          | 545 (25.1)   |
| Other <sup>2</sup>                  | 56 (2.6)     |
| Test order episode, median (IQR)    | 3 (2-4)      |
| Overall tests ordered, median (IQR) | 7 (5-9)      |
| Test result, n (%)                  |              |
| Positive                            | 626 (28.9)   |
| Negative                            | 1,542 (71.1) |

ED, Emergency Department; <sup>1</sup>Fifteen patients arriving by either wheelchair, correctional services vehicle, helicopter rescue service or walked-in were combined with 'State ambulance'; <sup>2</sup>Transferred to another hospital or left ED at own risk.

### The timing of respiratory virus testing

The median time from ED presentation to respiratory virus testing using the RMDT for all samples was 224 minutes (IQR, 133-349). There was considerable variation in the median time to RMDT across EDs which ranged from 173 minutes (IQR, 108-264) at ED B to 269 minutes (IQR, 178-444) at ED F (Figure 1).

### Study outcomes

The overall median ED LOS was 533 minutes. ED B had the shortest and ED D had the longest median ED LOS. Overall, 88% (n=1,907) of patients stayed >4 hours in ED (range across EDs:

78.2% at ED B to 92.0% at ED A). RMDT results were pending for 38% (n=824) of patients at the time of ED disposition (range across EDs: 15.1% at ED A to 70.7% at ED E) (Table 2).

**Table 2: Summary of study outcomes.**

| ED      | N     | Primary outcome                  | Secondary outcomes       |                                              |
|---------|-------|----------------------------------|--------------------------|----------------------------------------------|
|         |       | ED LOS (minute),<br>Median (IQR) | >4-hour ED LOS,<br>N (%) | Patient with a pending<br>RMDT result, N (%) |
| A       | 723   | 545 (358-953)                    | 665 (92.0)               | 109 (15.1)                                   |
| B       | 193   | 376 (257-549)                    | 151 (78.2)               | 80 (41.5)                                    |
| C       | 301   | 490 (342-859)                    | 263 (87.4)               | 157 (52.2)                                   |
| D       | 530   | 714 (366-1172)                   | 457 (86.2)               | 186 (35.1)                                   |
| E       | 239   | 455 (336-657)                    | 208 (87.0)               | 169 (70.7)                                   |
| F       | 182   | 700 (389-1177)                   | 163 (89.6)               | 123 (67.6)                                   |
| Overall | 2,168 | 533 (338.5-975)                  | 1,907 (88.0)             | 824 (38.0)                                   |

ED, Emergency Department; LOS, Length of Stay.

### **The association between the timing of respiratory virus testing and primary outcome**

The results of univariate analysis describing the association between baseline characteristics and each study outcome are presented in *Supplementary Table 1*. All baseline variables except arrival day of week and test result were significantly associated with ED LOS (Table S1).

The timing of respiratory virus testing was strongly associated with ED LOS. After adjustment for potential confounders, every 30-minute increase in the time to RMDT was associated with a 24.0-minute increase in the median ED LOS (95% CI, 21.8-26.1;  $P<0.001$ ). There were no major differences, in this association, by ED (Table 3).

**Table 3: Median regression showing association between the timing of respiratory virus testing (every 30-minute increase) and ED LOS (minutes).**

| ED      | N     | Unadjusted       | Adjusted <sup>†</sup> |
|---------|-------|------------------|-----------------------|
|         |       | Coef. (95% CI)   | Coef. (95% CI)        |
| A       | 723   | 26.4 (22.2-30.5) | 21.6 (16.5-26.7)      |
| B       | 193   | 32.4 (27.1-37.7) | 26.4 (20.0-32.8)      |
| C       | 301   | 30.9 (26.4-35.4) | 26.7 (22.3-31.2)      |
| D       | 530   | 31.7 (26.1-37.3) | 21.7 (17.7-25.8)      |
| E       | 239   | 25.8 (21.0-30.7) | 26.3 (21.5-31.0)      |
| F       | 182   | 28.0 (19.8-36.1) | 23.2 (14.6-31.8)      |
| Overall | 2,168 | 29.4 (27.5-31.2) | 24.0 (21.8-26.1)      |

All analyses were highly significant with a *P*-value of <0.001. The coefficient indicates the median change in a given outcome (e.g. ED LOS) for every 30-minute increase in the timing of the RMDT. <sup>†</sup>Adjusted for gender, age, triage category, ED arrival time, mode of arrival, study ED, patient disposition, test order episode. ED, Emergency Department; LOS, Length of Stay.

A subgroup analysis by patient disposition and ED arrival time is shown in *Supplementary Table 2*. The association was more pronounced among patients who were subsequently discharged than for admitted patients and among patients who arrived to EDs between 0700hrs to 1900hrs than for patients arriving between 1900hrs to 0700hrs (Table S2).

### **The association between the timing of respiratory virus testing and secondary outcomes**

The median time to RMDT was 113 minutes (IQR, 76-152) for patients with  $\leq 4$  hours ED LOS (n=261) and 250 minutes (IQR, 153-370) for patients staying >4 hours in ED (n=1,907). The median time to RMDT was 211 minutes (IQR, 122-336) for patients who received RMDT results before disposition (n=1,344) and 247 minutes (IQR, 151-364) for patients with pending RMDT results at disposition (n=824). Of the patients with pending RMDT results, the results of 30.3% (n=250) eventually came back positive for either influenza A/B or RSV.

The results of binary logistic regression are presented in Table 4 and show associations between the time to RMDT and secondary outcomes. The time to RMDT was positively associated with

both secondary outcomes. In the adjusted model, for every 30-minute increase in time to RMDT, the likelihood of staying >4 hours in ED (*versus* having ≤4 hours ED LOS) increased by a factor of 1.51 (OR, 1.51; 95% CI, 1.41-1.63;  $P<0.001$ ). This is equivalent to a 51% increase in the likelihood of staying >4 hours in ED.

The association between the timing of the RMDT and having a pending test result at ED disposition was not as striking as with other outcomes. In the total sample, for every 30-minute increase in the time to RMDT, the likelihood of experiencing a pending RMDT result at ED disposition increased by a factor of 1.04 – a 4% increase – (OR, 1.04; 95% CI, 1.02-1.05;  $P<0.001$ ) after adjustment for potential confounders. When the analysis was conducted separately by study EDs, the association was not statistically significant for EDs C, D and E (Table 4).

**Table 4: Binary logistic regression showing association between the timing of respiratory virus testing (every 30- minute increase) and secondary outcomes.**

| ED      | N     | > 4-hr ED LOS    |                       | Patient with a pending RMDT result |                                |
|---------|-------|------------------|-----------------------|------------------------------------|--------------------------------|
|         |       | Unadjusted       | Adjusted <sup>†</sup> | Unadjusted                         | Adjusted <sup>††</sup>         |
|         |       | OR (95% CI)      | OR (95% CI)           | OR (95% CI)                        | OR (95% CI)                    |
| A       | 723   | 1.58 (1.37-1.82) | 1.51 (1.28-1.79)      | 1.04 (1.01-1.07)                   | 1.06 (1.03-1.10)               |
| B       | 193   | 1.74 (1.41-2.14) | 1.70 (1.34-2.17)      | 1.06 (1.01-1.12)                   | 1.16 (1.07-1.25)               |
| C       | 301   | 1.51 (1.29-1.76) | 1.48 (1.25-1.75)      | 0.99 (0.96-1.02) <sup>NS</sup>     | 1.02 (0.99-1.06) <sup>NS</sup> |
| D       | 530   | 1.69 (1.48-1.93) | 1.64 (1.41-1.90)      | 0.99 (0.97-1.01) <sup>NS</sup>     | 1.02 (1.00-1.05) <sup>NS</sup> |
| E       | 239   | 1.40 (1.21-1.61) | 1.39 (1.19-1.63)      | 1.00 (0.96-1.04) <sup>NS</sup>     | 1.02 (0.97-1.07) <sup>NS</sup> |
| F       | 182   | 1.63 (1.28-2.07) | 1.90 (1.24-2.91)      | 1.01 (0.98-1.05) <sup>NS</sup>     | 1.05 (1.00-1.09)               |
| Overall | 2,168 | 1.54 (1.45-1.64) | 1.51 (1.41-1.63)      | 1.02 (1.01-1.03)                   | 1.04 (1.02-1.05)               |

1  
2  
3 All analyses, except those marked 'NS', were significant with a *P-value* of <0.05. The coefficient indicates the  
4 likelihood of a given outcome for every 30-minute increase in the timing of the RMDT. †Adjusted for age, triage  
5 category, mode of arrival, study ED, patient disposition, test order episode and test result. ††Adjusted for gender,  
6 age, triage category, mode of arrival, study ED, patient disposition, test order episode. ED, Emergency  
7 Department; NS, Not Significant.  
8  
9  
10  
11

## 12 Discussion

13  
14  
15 The major finding of this study is that for every 30-minute increase in the time from ED arrival  
16 until respiratory virus testing there was a 24.0-minute increase in the median ED LOS.  
17  
18 Moreover, an increase in the timing of respiratory virus testing was associated with a greater  
19 likelihood of experiencing an ED LOS greater than four hours and having a pending RMDT  
20 result at the time of disposition from the ED.  
21  
22  
23  
24  
25  
26  
27

28 Previous studies have also reported a significant association between ED LOS and the time  
29 taken to obtain the results from laboratory testing in EDs.<sup>6,23-25</sup> However, unlike our study, the  
30 previous studies have been conducted in a context of broader patient populations visiting ED  
31 and, therefore, direct comparisons with other studies are not possible. For example, Li *et al.*  
32 conducted a retrospective study that included 123,455 ED presentations for all conditions  
33 across four EDs in NSW, Australia. That study assessed the relationship between ED LOS and  
34 TAT and found a 17-minute increase in ED LOS for each 30-minute increase in TAT.<sup>6</sup> In a  
35 recent large US study, Kaushik *et al.* evaluated the impact of reducing laboratory TAT on ED  
36 LOS using data from 486 hospitals with 4,483,169 ED presentations.<sup>24</sup> In that study, a 1-minute  
37 decrease in TAT was associated with a 0.50-minute decrease in ED LOS.<sup>24</sup> In another US  
38 study, Kocher *et al.* investigated the effect of diagnostic testing and treatment patterns on ED  
39 LOS using data from a large national study that included approximately 360 million ED  
40 presentations.<sup>25</sup> They found that, the ordering of a blood test was the most time consuming  
41 testing modality resulting in an adjusted marginal effect of a 72-minute increase in ED LOS  
42 and the likelihood of experiencing a >4-hour ED LOS increased by a factor of 2.29.<sup>25</sup>  
43  
44  
45  
46  
47  
48  
49  
50  
51  
52  
53  
54  
55  
56  
57  
58  
59  
60

1  
2  
3 The present study revealed a direct relationship between the timing of respiratory virus testing  
4 and a range of indicators of timeliness of patient care in ED. Delays in the ordering of RMDT  
5  
6 had a negative impact on our selected ED outcomes. Our results suggest that earlier initiative  
7  
8 of RMDT may result in reduced ED LOS. More systemic or procedural changes in the way  
9  
10 healthcare is delivered (e.g. introduction of an early diagnostic testing protocol such as a triage-  
11  
12 initiated testing) may be needed in order to maximise its benefits. Triage-based testing  
13  
14 protocols have been shown to reduce wait times and ED LOS, decrease costs, reduces time to  
15  
16 receiving medications and improve patient satisfaction in other conditions.<sup>26-28</sup> In an  
17  
18 randomized controlled trial conducted in the US that including more than 1000 ED patients  
19  
20 aged <3years, influenza testing at triage using a non-molecular antigen-based method led to  
21  
22 significantly shorter ED LOS.<sup>29</sup> Future research should assess the potential impact of triage-  
23  
24 initiated ordering of RMDT for patients presenting to ED with suspected respiratory viral  
25  
26 infection on patient outcomes including the effect on ED LOS.  
27  
28  
29  
30  
31

32  
33 The current study showed that a delay in respiratory virus testing was associated with an  
34  
35 increased likelihood of having a pending test result at ED disposition. The test results of 30.3%  
36  
37 of patients with pending test results eventually came back positive for either influenza A/B or  
38  
39 RSV. From an infection transmission perspective, patients who were discharged with pending  
40  
41 results could potentially spread the infection, especially if appropriate management was not  
42  
43 provided.  
44  
45  
46  
47

### 48 **Strengths and weaknesses of the study**

49

50  
51 To the best of our knowledge, this is the first study to explore the relationship between the  
52  
53 timing of respiratory virus molecular testing and ED outcomes among patients presenting with  
54  
55 respiratory infections. Drawing from a large linked dataset in a multicentre study involving six  
56  
57 hospital EDs further strengthened the generalizability of our findings.  
58  
59  
60



1  
2  
3 Our study has some limitations. This study was conducted among adult patients (age>18 years).  
4  
5 Given the impact of RMDT on ED LOS can be different among patients aged≤18 years<sup>16</sup>, our  
6  
7 findings may not be applicable to paediatric populations. It is important to note that, being an  
8  
9 observational study, the findings of the current study do not imply a causal relationship. Our  
10  
11 analyses were not adjusted for other factors which may have confounded the findings of this  
12  
13 study. The input-throughput-output model<sup>30</sup> is commonly used in studies assessing factors  
14  
15 affecting LOS and ED overcrowding.<sup>25 31 32</sup> Input factors are characteristics that contribute to  
16  
17 the demand for ED services (e.g. patient demographics and ED presentation characteristics).<sup>30</sup>  
18  
19 Throughput factors are characteristics related to ED care such as diagnostic evaluations and  
20  
21 treatment.<sup>25 30</sup> Output factors are organisational or hospital capacity-related characteristics (e.g.  
22  
23 access block).<sup>30 32</sup> Whilst our multivariable models were adjusted for a number of input  
24  
25 variables, our current analysis did not consider the effect of several throughput and  
26  
27 output/organisational factors due to lack of data. Previous studies have shown that throughput  
28  
29 factors such as diagnostic imaging<sup>25</sup>, clinical assessment<sup>33</sup> and treatment (administering a  
30  
31 medication and performing a procedure)<sup>25</sup> and output/organisational factors<sup>32 34 35</sup> are  
32  
33 important factors influencing ED LOS.  
34  
35  
36  
37  
38  
39

## 40 **Conclusion**

41  
42  
43 The timing of respiratory virus molecular testing in EDs was significantly associated with a  
44  
45 range of outcome indicators. Results suggest the potential to maximise the benefits of RMDT  
46  
47 by introducing an early diagnostic protocol such as a triage-initiated testing which warrants  
48  
49 investigations in future studies.  
50  
51  
52

53 **Patient consent for publication:** Not required.

54  
55  
56 **Contributors:**  
57  
58  
59  
60

1  
2  
3  
4  
5  
6 AG, LL, MRD, RL, JT and JIW conceived the study and obtained research funding. NW and  
7  
8 LL contributed to extraction, cleaning, linkage and analysis of data with input from other team  
9  
10 members. NW, MRD, LL, JT, JIW and AG contributed to the interpretation of the results or  
11  
12 drafting of the manuscript. All authors involved in the design of the study, critical revision of  
13  
14 the manuscript and approved the final manuscript.  
15  
16

17  
18 **Funding:** This work was supported by National Health and Medical Research Council of  
19  
20 Australia Partnership Project Grant [grant number, APP1111925].  
21  
22

23  
24 **Ethical approval:** Ethics approval was granted by the Human Research Ethics Committee of  
25  
26 the South Eastern Sydney Local Health District (HREC/16/POWH/412).  
27  
28

29  
30 **Conflicts of interests:** None declared.  
31

32  
33 **Data sharing statement:** No additional data available  
34

## 35 36 37 38 39 40 41 42 43 44 45 46 47 48 49 50 51 52 53 54 55 56 57 58 59 60

### References

1. Wickman L, Svensson P, Djarv T. Effect of crowding on length of stay for common chief complaints in the emergency department: A STROBE cohort study. *Medicine* 2017;96(44):e8457. doi: 10.1097/md.00000000000008457
2. Sikka R, Mehta S, Kaucky C, et al. ED crowding is associated with an increased time to pneumonia treatment. *Am J Emerg Med* 2010;28(7):809-12. doi: 10.1016/j.ajem.2009.06.023.
3. Morley C, Unwin M, Peterson GM, et al. Emergency department crowding: A systematic review of causes, consequences and solutions. *PLoS One* 2018;13(8):e0203316. doi: 10.1371/journal.pone.0203316.

- 1  
2  
3 4. Lewandrowski K. POC testing in the emergency department: Strategies to improve clinical  
4  
5 and operational outcomes. 2011  
6
- 7  
8 5. Pines JM, Hilton JA, Weber EJ, et al. International perspectives on emergency department  
9  
10 crowding. *Academic emergency medicine : official journal of the Society for*  
11  
12 *Academic Emergency Medicine* 2011;18(12):1358-70. doi: 10.1111/j.1553-  
13  
14 2712.2011.01235.x.  
15
- 16  
17 6. Li L, Georgiou A, Vecellio E, et al. The effect of laboratory testing on emergency  
18  
19 department length of stay: a multihospital longitudinal study applying a cross-  
20  
21 classified random-effect modeling approach. *Academic emergency medicine : official*  
22  
23 *journal of the Society for Academic Emergency Medicine* 2015;22(1):38-46. doi:  
24  
25 10.1111/acem.12565.  
26  
27
- 28  
29 7. Rooney KD, Schilling UM. Point-of-care testing in the overcrowded emergency  
30  
31 department—can it make a difference? *Critical Care* 2014;18(6):692.  
32
- 33  
34 8. Rappo U, Schuetz AN, Jenkins SG, et al. Impact of Early Detection of Respiratory Viruses  
35  
36 by Multiplex PCR Assay on Clinical Outcomes in Adult Patients. *Journal of clinical*  
37  
38 *microbiology* 2016;54(8):2096-103. doi: 10.1128/jcm.00549-16.  
39
- 40  
41 9. Sullivan C, Staib A, Khanna S, et al. The National Emergency Access Target (NEAT) and  
42  
43 the 4-hour rule: time to review the target. *The Medical journal of Australia*  
44  
45 2016;204(9):354.  
46
- 47  
48 10. Linehan E, Brennan M, O'Rourke S, et al. Impact of introduction of xpert flu assay for  
49  
50 influenza PCR testing on obstetric patients: a quality improvement project. *The*  
51  
52 *journal of maternal-fetal & neonatal medicine : the official journal of the European*  
53  
54 *Association of Perinatal Medicine, the Federation of Asia and Oceania Perinatal*  
55  
56 *Societies, the International Society of Perinatal Obstet* 2018;31(8):1016-20. doi:  
57  
58 10.1080/14767058.2017.1306048.  
59  
60

- 1  
2  
3 11. Ko F, Drews SJ. The impact of commercial rapid respiratory virus diagnostic tests on  
4 patient outcomes and health system utilization. *Expert Review of Molecular*  
5  
6 *Diagnostics* 2017;17(10):917-31. doi: 10.1080/14737159.2017.1372195  
7  
8  
9
- 10 12. Poehling KA, Zhu Y, Tang YW, et al. Accuracy and impact of a point-of-care rapid  
11  
12 influenza test in young children with respiratory illnesses. *Archives of pediatrics &*  
13  
14 *adolescent medicine* 2006;160(7):713-8. doi: 10.1001/archpedi.160.7.713.  
15  
16
- 17 13. Blaschke AJ, Shapiro DJ, Pavia AT, et al. A National Study of the Impact of Rapid  
18  
19 Influenza Testing on Clinical Care in the Emergency Department. *Journal of the*  
20  
21 *Pediatric Infectious Diseases Society* 2014;3(2):112-8. doi: 10.1093/jpids/pit071.  
22  
23
- 24 14. Jeong HW, Heo JY, Park JS, et al. Effect of the influenza virus rapid antigen test on a  
25  
26 physician's decision to prescribe antibiotics and on patient length of stay in the  
27  
28 emergency department. *PLoS One* 2014;9(11):e110978. doi:  
29  
30 10.1371/journal.pone.0110978.  
31  
32
- 33 15. Doan Q, Enarson P, Kisson N, et al. Rapid viral diagnosis for acute febrile respiratory  
34  
35 illness in children in the Emergency Department. *The Cochrane database of*  
36  
37 *systematic reviews* 2014(9):Cd006452. doi: 10.1002/14651858.CD006452.pub4.  
38  
39
- 40 16. Wabe N, Li L, Lindeman R, et al. Association of rapid molecular diagnostic testing of  
41  
42 respiratory viruses with emergency department patient and laboratory outcomes: A  
43  
44 before-after study. *Medical Journal of Australia* 2018;In press (accepted 12  
45  
46 November 2018)  
47  
48
- 49 17. Dahm MR, Georgiou A, Westbrook JI, et al. Delivering safe and effective test-result  
50  
51 communication, management and follow-up: a mixed-methods study protocol. *BMJ*  
52  
53 *open* 2018;8(2):e020235. doi: 10.1136/bmjopen-2017-020235.  
54  
55  
56  
57  
58  
59  
60

- 1  
2  
3 18. Arbefeville S, Thonen-Kerr E, Ferrieri P. Prospective and Retrospective Evaluation of the  
4  
5 Performance of the FDA-Approved Cepheid Xpert Flu/RSV XC Assay. *Lab Med*  
6  
7 2017;48(4):e53-e56. doi: 10.1093/labmed/lmx038.  
8  
9
- 10 19. Wabe N, Li L, Sezgin G, et al. Pending Laboratory Test Results at the Time of Discharge:  
11  
12 A 3-Year Retrospective Comparison of Paper Versus Electronic Test Ordering in  
13  
14 Three Emergency Departments. *Studies in health technology and informatics*  
15  
16 2018;252:164-69.  
17  
18
- 19 20. Le Cook B, Manning WG. Thinking beyond the mean: a practical guide for using quantile  
20  
21 regression methods for health services research. *Shanghai archives of psychiatry*  
22  
23 2013;25(1):55-9. doi: 10.3969/j.issn.1002-0829.2013.01.011.  
24  
25
- 26 21. McGreevy KM, Lipsitz SR, Linder JA, et al. Using median regression to obtain adjusted  
27  
28 estimates of central tendency for skewed laboratory and epidemiologic data. *Clinical*  
29  
30 *chemistry* 2009;55(1):165-9. doi: 10.1373/clinchem.2008.106260.  
31  
32
- 33 22. Lee AH, Fung WK, Fu B. Analyzing hospital length of stay: mean or median regression?  
34  
35 *Medical care* 2003;41(5):681-6. doi: 10.1097/01.Mlr.0000062550.23101.6f.  
36  
37
- 38 23. Holland LL, Smith LL, Blick KE. Reducing laboratory turnaround time outliers can  
39  
40 reduce emergency department patient length of stay: an 11-hospital study. *American*  
41  
42 *journal of clinical pathology* 2005;124(5):672-74.  
43  
44
- 45 24. Kaushik N, Khangulov VS, O'Hara M, et al. Reduction in laboratory turnaround time  
46  
47 decreases emergency room length of stay. *Open access emergency medicine: OAEM*  
48  
49 2018;10:37.  
50
- 51 25. Kocher KE, Meurer WJ, Desmond JS, et al. Effect of testing and treatment on emergency  
52  
53 department length of stay using a national database. *Academic emergency medicine :*  
54  
55 *official journal of the Society for Academic Emergency Medicine* 2012;19(5):525-34.  
56  
57 doi: 10.1111/j.1553-2712.2012.01353.x.  
58  
59  
60

- 1  
2  
3 26. Wiler JL, Gentle C, Halfpenny JM, et al. Optimizing emergency department front-end  
4 operations. *Annals of emergency medicine* 2010;55(2):142-60.e1. doi:  
5  
6 10.1016/j.annemergmed.2009.05.021.  
7  
8  
9  
10 27. Oredsson S, Jonsson H, Rognes J, et al. A systematic review of triage-related  
11 interventions to improve patient flow in emergency departments. *Scandinavian*  
12 *journal of trauma, resuscitation and emergency medicine* 2011;19:43. doi:  
13  
14 10.1186/1757-7241-19-43.  
15  
16  
17  
18 28. Barksdale AN, Hackman JL, Williams K, et al. ED triage pain protocol reduces time to  
19 receiving analgesics in patients with painful conditions. *Am J Emerg Med*  
20  
21 2016;34(12):2362-66. doi: 10.1016/j.ajem.2016.08.051.  
22  
23  
24  
25 29. Abanses JC, Dowd MD, Simon SD, et al. Impact of rapid influenza testing at triage on  
26 management of febrile infants and young children. *Pediatric emergency care*  
27  
28 2006;22(3):145-9.  
29  
30  
31  
32 30. Asplin BR, Magid DJ, Rhodes KV, et al. A conceptual model of emergency department  
33 crowding. *Annals of emergency medicine* 2003;42(2):173-80. doi:  
34  
35 10.1067/mem.2003.302.  
36  
37  
38  
39 31. Doupe M, Chateau D, Derksen S, et al. Factors affecting emergency department waiting  
40 room times in Winnipeg: Manitoba Centre for Health Policy, University of Manitoba  
41  
42 2017.  
43  
44  
45  
46 32. Bashkin O, Caspi S, Haligoa R, et al. Organizational factors affecting length of stay in the  
47 emergency department: initial observational study. *Israel journal of health policy*  
48  
49 *research* 2015;4:38. doi: 10.1186/s13584-015-0035-6.  
50  
51  
52  
53 33. Yoon P, Steiner I, Reinhardt G. Analysis of factors influencing length of stay in the  
54 emergency department. *Cjem* 2003;5(3):155-61.  
55  
56  
57  
58  
59  
60

- 1  
2  
3 34. Forero R, McCarthy S, Hillman K. Access block and emergency department  
4  
5 overcrowding. *Critical care (London, England)* 2011;15(2):216. doi: 10.1186/cc9998.  
6  
7  
8 35. Fatovich DM, Nagree Y, Sprivulis P. Access block causes emergency department  
9  
10 overcrowding and ambulance diversion in Perth, Western Australia. *Emergency*  
11  
12 *Medicine Journal* 2005;22(5):351-54. doi: 10.1136/emj.2004.018002.  
13  
14  
15  
16  
17  
18  
19  
20  
21  
22  
23  
24  
25  
26  
27  
28  
29  
30  
31  
32  
33  
34  
35  
36  
37  
38  
39  
40  
41  
42  
43  
44  
45  
46  
47  
48  
49  
50  
51  
52  
53  
54  
55  
56  
57  
58  
59  
60

For peer review only

### Figure's Legend

**Figure 1: The time to RMDT by study EDs:** Boxes represent the IQR (25<sup>th</sup> and 75<sup>th</sup> percentiles) with the median (50<sup>th</sup> percentile) value within the boxes, the mean value is represented as a '+' and the capped bars represent the 10<sup>th</sup> and 90<sup>th</sup> percentiles. The broken line indicates the overall median time to RMDT.

For peer review only



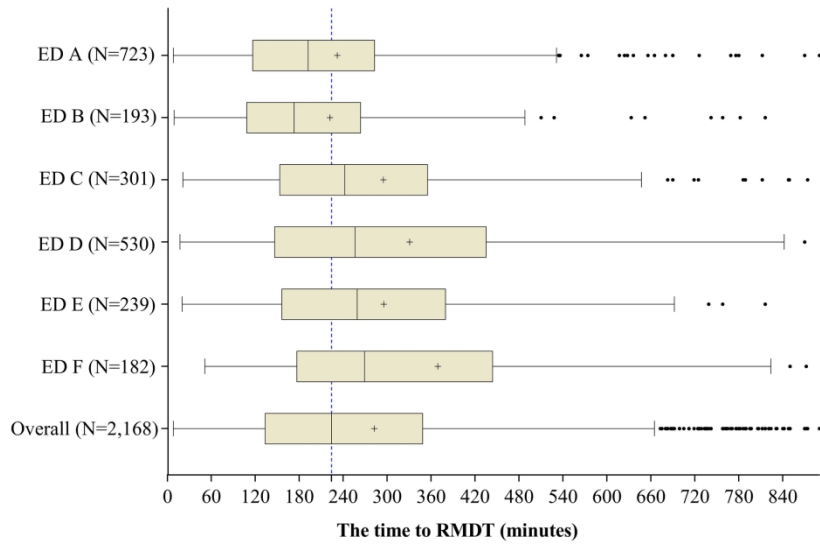

Figure 1: The time to RMDT by study EDs: Boxes represent the IQR (25th and 75th percentiles) with the median (50th percentile) value within the boxes, the mean value is represented as a '+' and the capped bars represent the 10th and 90th percentiles. The broken line indicates the overall median time to RMDT.

214x124mm (300 x 300 DPI)

## Supplementary Data

Table S1: Univariate analysis showing variables associated with primary and secondary outcomes (N=2,168).

| Variables                                 | ED LOS<br>(min)                 | > 4-hr ED LOS                  | Patient with a pending RMDT<br>result |
|-------------------------------------------|---------------------------------|--------------------------------|---------------------------------------|
|                                           | Coef. (95% CI)                  | OR (95% CI)                    | OR (95% CI)                           |
| Female vs. Male                           | -75 (-119.6 to -30.4)           | 0.82 (0.63-1.07) <sup>NS</sup> | 1.26 (1.06-1.51)                      |
| Age (for every 10-year increase)          | 51.2 (40.5 to 61.9)             | 1.38 (1.3-1.46)                | 0.86 (0.82-0.90)                      |
| Triage                                    |                                 |                                |                                       |
| Semi-urgent vs. Urgent                    | -123 (-179.8 to -66.2)          | 0.43 (0.32-0.58)               | 1.66 (1.33-2.07)                      |
| Arrival time                              |                                 |                                |                                       |
| 0700hrs to 1900hrs vs. 1900hrs to 0700hrs | -188 (-233.6 to -142.4)         | 0.75 (0.56-1.01) <sup>NS</sup> | 0.97 (0.80-1.17) <sup>NS</sup>        |
| Arrival day of week                       |                                 |                                |                                       |
| Weekdays vs. Weekends                     | 8 (-39.8 to 55.8) <sup>NS</sup> | 1.06 (0.80-1.42) <sup>NS</sup> | 1.01 (0.83-1.22) <sup>NS</sup>        |
| Mode of arrival                           |                                 |                                |                                       |
| Ambulance vs. private/public transport    | 224 (180.6 to 267.4)            | 3.76 (2.85-4.98)               | 0.63 (0.53-0.76)                      |
| Study ED                                  |                                 |                                |                                       |

|                                               |                                    |                                |                                |
|-----------------------------------------------|------------------------------------|--------------------------------|--------------------------------|
| A                                             | Ref                                | Ref                            | Ref                            |
| B                                             | -169 (-257.7 to -80.3)             | 0.31 (0.20-0.48)               | 3.99 (2.81-5.67)               |
| C                                             | -55 (-130.1 to 20.1) <sup>NS</sup> | 0.60 (0.39-0.93)               | 6.14 (4.53-8.33)               |
| D                                             | 169 (106.4 to 231.6)               | 0.55 (0.38-0.79)               | 3.05 (2.32-3.99)               |
| E                                             | -90 (-171.6 to -8.4)               | 0.59 (0.37-0.93)               | 13.60 (9.63-19.20)             |
| F                                             | 162 (71.3 to 252.7)                | 0.75 (0.43-1.29) <sup>NS</sup> | 11.74 (8.10-17.02)             |
| Patient disposition                           |                                    |                                |                                |
| Discharged vs. Admitted                       | -325 (-380.3 to -269.7)            | 0.17 (0.13-0.22)               | 2.41 (1.97-2.94)               |
| Test order episode                            | 120.6 (109.1 to 132.0)             | 2.58 (2.23-2.99)               | 0.83 (0.79-0.88)               |
| No. of tests (for every 3 more tests ordered) | 167.6 (149.5 to 185.7)             | 3.3 (2.78-3.93)                | 0.85 (0.78-0.92)               |
| Test result                                   |                                    |                                |                                |
| Positive vs. Negative                         | -39 (-85.5 to 7.5) <sup>NS</sup>   | 0.71 (0.54-0.94)               | 1.12 (0.93-1.36) <sup>NS</sup> |

ED, Emergency Department; RMDT, Rapid Molecular Diagnostic Test; LOS, Length of Stay; NS, Not Significant.

**Table S2: Multivariate analysis showing the association between the timing of respiratory virus testing (every 30-min increase) with study outcomes by patient disposition and ED arrival time.**

| Variable            | N     | ED LOS<br>(min) <sup>†</sup> | > 4-hr ED LOS <sup>††</sup> | Patient with a pending RMDT<br>result <sup>†††</sup> |
|---------------------|-------|------------------------------|-----------------------------|------------------------------------------------------|
|                     |       | Coef. (95% CI)               | OR (95% CI)                 | OR (95% CI)                                          |
| Patient disposition |       |                              |                             |                                                      |
| Discharged          | 545   | 28.0 (25.6-30.4)             | 1.68 (1.48-1.91)            | 1.09 (1.03-1.14)                                     |
| Admitted            | 1,567 | 22.3 (19.4-25.2)             | 1.44 (1.32-1.58)            | 1.04 (1.02-1.05)                                     |
| ED arrival time     |       |                              |                             |                                                      |
| 0700hrs to 1900hrs  | 1,528 | 26.6 (24.3-29.0)             | 1.49 (1.37-1.62)            | 1.03 (1.01-1.04)                                     |
| 1900hrs to 0700hrs  | 640   | 17.8 (13.4-22.0)             | 1.58 (1.37-1.81)            | 1.06 (1.03-1.09)                                     |

All analyses were significant with a *P-value* of <0.001. ED, Emergency Department; RMDT, Rapid Molecular Diagnostic Test; LOS, Length of Stay; <sup>†</sup>Adjusted for gender, age, triage category, mode of arrival, study ED, test order episode; <sup>††</sup>Adjusted for age, arrival day of week, mode of arrival, study ED and test order episode; <sup>†††</sup>Adjusted for gender, age, triage category, mode of arrival, study ED and test order episode.

**The RECORD statement – checklist of items, extended from the STROBE statement, that should be reported in observational studies using routinely collected health data.**

|                           | Item No. | STROBE items                                                                                                                                                                               | Location in manuscript where items are reported | RECORD items                                                                                                                                                                                                                                                                                                                                                                                                                                | Location in manuscript where items are reported                                    |
|---------------------------|----------|--------------------------------------------------------------------------------------------------------------------------------------------------------------------------------------------|-------------------------------------------------|---------------------------------------------------------------------------------------------------------------------------------------------------------------------------------------------------------------------------------------------------------------------------------------------------------------------------------------------------------------------------------------------------------------------------------------------|------------------------------------------------------------------------------------|
| <b>Title and abstract</b> |          |                                                                                                                                                                                            |                                                 |                                                                                                                                                                                                                                                                                                                                                                                                                                             |                                                                                    |
|                           | 1        | (a) Indicate the study's design with a commonly used term in the title or the abstract (b) Provide in the abstract an informative and balanced summary of what was done and what was found | a=page 1<br>b=page 2                            | RECORD 1.1: The type of data used should be specified in the title or abstract. When possible, the name of the databases used should be included.<br><br>RECORD 1.2: If applicable, the geographic region and timeframe within which the study took place should be reported in the title or abstract.<br><br>RECORD 1.3: If linkage between databases was conducted for the study, this should be clearly stated in the title or abstract. | 1.1=page 2 ('Setting')<br><br>1.2=page 2 ('Setting')<br><br>1.3=page 2 ('Setting') |
| <b>Introduction</b>       |          |                                                                                                                                                                                            |                                                 |                                                                                                                                                                                                                                                                                                                                                                                                                                             |                                                                                    |
| Background rationale      | 2        | Explain the scientific background and rationale for the investigation being reported                                                                                                       | Page 4                                          |                                                                                                                                                                                                                                                                                                                                                                                                                                             |                                                                                    |
| Objectives                | 3        | State specific objectives, including any prespecified hypotheses                                                                                                                           | Pages 4 and 5                                   |                                                                                                                                                                                                                                                                                                                                                                                                                                             |                                                                                    |
| <b>Methods</b>            |          |                                                                                                                                                                                            |                                                 |                                                                                                                                                                                                                                                                                                                                                                                                                                             |                                                                                    |
| Study Design              | 4        | Present key elements of study design early in the paper                                                                                                                                    | Page 5                                          |                                                                                                                                                                                                                                                                                                                                                                                                                                             |                                                                                    |
| Setting                   | 5        | Describe the setting, locations, and relevant dates, including periods of recruitment, exposure, follow-up, and data collection                                                            | Page 5                                          |                                                                                                                                                                                                                                                                                                                                                                                                                                             |                                                                                    |

|                              |   |                                                                                                                                                                                                                                                                                                                                                                                                                                                                                                                                                                                                                                                                                                                              |         |                                                                                                                                                                                                                                                                                                                                                                                                                                                                                                                                                                                                                                                                                                      |                                                                                                                                                                         |
|------------------------------|---|------------------------------------------------------------------------------------------------------------------------------------------------------------------------------------------------------------------------------------------------------------------------------------------------------------------------------------------------------------------------------------------------------------------------------------------------------------------------------------------------------------------------------------------------------------------------------------------------------------------------------------------------------------------------------------------------------------------------------|---------|------------------------------------------------------------------------------------------------------------------------------------------------------------------------------------------------------------------------------------------------------------------------------------------------------------------------------------------------------------------------------------------------------------------------------------------------------------------------------------------------------------------------------------------------------------------------------------------------------------------------------------------------------------------------------------------------------|-------------------------------------------------------------------------------------------------------------------------------------------------------------------------|
| Participants                 | 6 | <p>(a) <i>Cohort study</i> - Give the eligibility criteria, and the sources and methods of selection of participants. Describe methods of follow-up</p> <p><i>Case-control study</i> - Give the eligibility criteria, and the sources and methods of case ascertainment and control selection. Give the rationale for the choice of cases and controls</p> <p><i>Cross-sectional study</i> - Give the eligibility criteria, and the sources and methods of selection of participants</p> <p>(b) <i>Cohort study</i> - For matched studies, give matching criteria and number of exposed and unexposed</p> <p><i>Case-control study</i> - For matched studies, give matching criteria and the number of controls per case</p> | Page 5. | <p>RECORD 6.1: The methods of study population selection (such as codes or algorithms used to identify subjects) should be listed in detail. If this is not possible, an explanation should be provided.</p> <p>RECORD 6.2: Any validation studies of the codes or algorithms used to select the population should be referenced. If validation was conducted for this study and not published elsewhere, detailed methods and results should be provided.</p> <p>RECORD 6.3: If the study involved linkage of databases, consider use of a flow diagram or other graphical display to demonstrate the data linkage process, including the number of individuals with linked data at each stage.</p> | <p>The study was retrospective observational study as detailed in Page 5</p> <p>Not applicable</p> <p>Separate reference was provided regarding the linkage process</p> |
| Variables                    | 7 | Clearly define all outcomes, exposures, predictors, potential confounders, and effect modifiers. Give diagnostic criteria, if applicable.                                                                                                                                                                                                                                                                                                                                                                                                                                                                                                                                                                                    | Page 6  | RECORD 7.1: A complete list of codes and algorithms used to classify exposures, outcomes, confounders, and effect modifiers should be provided. If these cannot be reported, an explanation should be provided.                                                                                                                                                                                                                                                                                                                                                                                                                                                                                      |                                                                                                                                                                         |
| Data sources/<br>measurement | 8 | For each variable of interest, give sources of data and details of methods of assessment (measurement). Describe comparability of assessment methods if there is more than one group                                                                                                                                                                                                                                                                                                                                                                                                                                                                                                                                         | Page 5  |                                                                                                                                                                                                                                                                                                                                                                                                                                                                                                                                                                                                                                                                                                      |                                                                                                                                                                         |

|                        |    |                                                                                                                                                                                                                                                                                                                                                                                                                                                                                                                                                                                                     |                                                                                  |  |  |
|------------------------|----|-----------------------------------------------------------------------------------------------------------------------------------------------------------------------------------------------------------------------------------------------------------------------------------------------------------------------------------------------------------------------------------------------------------------------------------------------------------------------------------------------------------------------------------------------------------------------------------------------------|----------------------------------------------------------------------------------|--|--|
| Bias                   | 9  | Describe any efforts to address potential sources of bias                                                                                                                                                                                                                                                                                                                                                                                                                                                                                                                                           | Not described directly but effort was made to describe potential confounders     |  |  |
| Study size             | 10 | Explain how the study size was arrived at                                                                                                                                                                                                                                                                                                                                                                                                                                                                                                                                                           | Page 5 –the study included all participants who fulfilled the inclusion criteria |  |  |
| Quantitative variables | 11 | Explain how quantitative variables were handled in the analyses. If applicable, describe which groupings were chosen, and why                                                                                                                                                                                                                                                                                                                                                                                                                                                                       | Pages 5 and 6                                                                    |  |  |
| Statistical methods    | 12 | <p>(a) Describe all statistical methods, including those used to control for confounding</p> <p>(b) Describe any methods used to examine subgroups and interactions</p> <p>(c) Explain how missing data were addressed</p> <p>(d) <i>Cohort study</i> - If applicable, explain how loss to follow-up was addressed</p> <p><i>Case-control study</i> - If applicable, explain how matching of cases and controls was addressed</p> <p><i>Cross-sectional study</i> - If applicable, describe analytical methods taking account of sampling strategy</p> <p>(e) Describe any sensitivity analyses</p> | Pages 5 and 6                                                                    |  |  |

|                                                                                        |                                  |                                                                                     |                                                                                                                                                                                                                                                                                                                        |                                                                                                                                                                                                                                                              |                                                                                                                                                                                                                                                                                                                    |
|----------------------------------------------------------------------------------------|----------------------------------|-------------------------------------------------------------------------------------|------------------------------------------------------------------------------------------------------------------------------------------------------------------------------------------------------------------------------------------------------------------------------------------------------------------------|--------------------------------------------------------------------------------------------------------------------------------------------------------------------------------------------------------------------------------------------------------------|--------------------------------------------------------------------------------------------------------------------------------------------------------------------------------------------------------------------------------------------------------------------------------------------------------------------|
| 1<br>2<br>3<br>4<br>5<br>6<br>7<br>8<br>9                                              | Data access and cleaning methods | .. Separate reference was provided regarding the data cleaning and linkage process. |                                                                                                                                                                                                                                                                                                                        | RECORD 12.1: Authors should describe the extent to which the investigators had access to the database population used to create the study population.<br><br>RECORD 12.2: Authors should provide information on the data cleaning methods used in the study. |                                                                                                                                                                                                                                                                                                                    |
| 10<br>11<br>12<br>13<br>14<br>15<br>16<br>17<br>18                                     | Linkage                          | .. Separate reference was provided regarding the data cleaning and linkage process. |                                                                                                                                                                                                                                                                                                                        | RECORD 12.3: State whether the study included person-level, institutional-level, or other data linkage across two or more databases. The methods of linkage and methods of linkage quality evaluation should be provided.                                    |                                                                                                                                                                                                                                                                                                                    |
| 19                                                                                     | <b>Results</b>                   |                                                                                     |                                                                                                                                                                                                                                                                                                                        |                                                                                                                                                                                                                                                              |                                                                                                                                                                                                                                                                                                                    |
| 20<br>21<br>22<br>23<br>24<br>25<br>26<br>27<br>28<br>29<br>30<br>31<br>32             | Participants                     | 13                                                                                  | (a) Report the numbers of individuals at each stage of the study ( <i>e.g.</i> , numbers potentially eligible, examined for eligibility, confirmed eligible, included in the study, completing follow-up, and analysed)<br>(b) Give reasons for non-participation at each stage.<br>(c) Consider use of a flow diagram | Page 7                                                                                                                                                                                                                                                       | RECORD 13.1: Describe in detail the selection of the persons included in the study ( <i>i.e.</i> , study population selection) including filtering based on data quality, data availability and linkage. The selection of included persons can be described in the text and/or by means of the study flow diagram. |
| 33<br>34<br>35<br>36<br>37<br>38<br>39<br>40<br>41<br>42<br>43<br>44<br>45<br>46<br>47 | Descriptive data                 | 14                                                                                  | (a) Give characteristics of study participants ( <i>e.g.</i> , demographic, clinical, social) and information on exposures and potential confounders<br>(b) Indicate the number of participants with missing data for each variable of interest                                                                        | Pages 7 and 8                                                                                                                                                                                                                                                |                                                                                                                                                                                                                                                                                                                    |



|                   |    |                                                                                                                                                                                                                                                                                                                                                                                                                 |                    |                                                                                                                                             |  |
|-------------------|----|-----------------------------------------------------------------------------------------------------------------------------------------------------------------------------------------------------------------------------------------------------------------------------------------------------------------------------------------------------------------------------------------------------------------|--------------------|---------------------------------------------------------------------------------------------------------------------------------------------|--|
|                   |    | (c) <i>Cohort study</i> - summarise follow-up time (e.g., average and total amount)                                                                                                                                                                                                                                                                                                                             |                    |                                                                                                                                             |  |
| Outcome data      | 15 | <i>Cohort study</i> - Report numbers of outcome events or summary measures over time<br><i>Case-control study</i> - Report numbers in each exposure category, or summary measures of exposure<br><i>Cross-sectional study</i> - Report numbers of outcome events or summary measures                                                                                                                            | Pages 9 and 10     |                                                                                                                                             |  |
| Main results      | 16 | (a) Give unadjusted estimates and, if applicable, confounder-adjusted estimates and their precision (e.g., 95% confidence interval). Make clear which confounders were adjusted for and why they were included<br>(b) Report category boundaries when continuous variables were categorized<br>(c) If relevant, consider translating estimates of relative risk into absolute risk for a meaningful time period | Page 10-12         |                                                                                                                                             |  |
| Other analyses    | 17 | Report other analyses done— e.g., analyses of subgroups and interactions, and sensitivity analyses                                                                                                                                                                                                                                                                                                              | Supplementary data |                                                                                                                                             |  |
| <b>Discussion</b> |    |                                                                                                                                                                                                                                                                                                                                                                                                                 |                    |                                                                                                                                             |  |
| Key results       | 18 | Summarise key results with reference to study objectives                                                                                                                                                                                                                                                                                                                                                        | Page 13            |                                                                                                                                             |  |
| Limitations       | 19 | Discuss limitations of the study, taking into account sources of potential bias or imprecision.                                                                                                                                                                                                                                                                                                                 | Pages 14 and 15    | RECORD 19.1: Discuss the implications of using data that were not created or collected to answer the specific research question(s). Include |  |

|                                                           |    |                                                                                                                                                                            |                 |                                                                                                                                                              |  |
|-----------------------------------------------------------|----|----------------------------------------------------------------------------------------------------------------------------------------------------------------------------|-----------------|--------------------------------------------------------------------------------------------------------------------------------------------------------------|--|
|                                                           |    | Discuss both direction and magnitude of any potential bias                                                                                                                 |                 | discussion of misclassification bias, unmeasured confounding, missing data, and changing eligibility over time, as they pertain to the study being reported. |  |
| Interpretation                                            | 20 | Give a cautious overall interpretation of results considering objectives, limitations, multiplicity of analyses, results from similar studies, and other relevant evidence | Pages 13 and 14 |                                                                                                                                                              |  |
| Generalisability                                          | 21 | Discuss the generalisability (external validity) of the study results                                                                                                      | Page 14         |                                                                                                                                                              |  |
| <b>Other Information</b>                                  |    |                                                                                                                                                                            |                 |                                                                                                                                                              |  |
| Funding                                                   | 22 | Give the source of funding and the role of the funders for the present study and, if applicable, for the original study on which the present article is based              | Page 16         |                                                                                                                                                              |  |
| Accessibility of protocol, raw data, and programming code |    | ..                                                                                                                                                                         | NA              | RECORD 22.1: Authors should provide information on how to access any supplemental information such as the study protocol, raw data, or programming code.     |  |

\*Reference: Benchimol EI, Smeeth L, Guttman A, Harron K, Moher D, Petersen I, Sørensen HT, von Elm E, Langan SM, the RECORD Working Committee. The REporting of studies Conducted using Observational Routinely-collected health Data (RECORD) Statement. *PLoS Medicine* 2015; in press.

\*Checklist is protected under Creative Commons Attribution ([CC BY](https://creativecommons.org/licenses/by/4.0/)) license.

# BMJ Open

## The timing of respiratory virus molecular testing in emergency departments and its association with patient care outcomes: A retrospective observational study across six Australian hospitals

|                                 |                                                                                                                                                                                                                                                                                                                                                                                                                                                                                                                                                                                                                                                                                                                                                                                                                                                                                                                                                                                                       |
|---------------------------------|-------------------------------------------------------------------------------------------------------------------------------------------------------------------------------------------------------------------------------------------------------------------------------------------------------------------------------------------------------------------------------------------------------------------------------------------------------------------------------------------------------------------------------------------------------------------------------------------------------------------------------------------------------------------------------------------------------------------------------------------------------------------------------------------------------------------------------------------------------------------------------------------------------------------------------------------------------------------------------------------------------|
| Journal:                        | <i>BMJ Open</i>                                                                                                                                                                                                                                                                                                                                                                                                                                                                                                                                                                                                                                                                                                                                                                                                                                                                                                                                                                                       |
| Manuscript ID                   | bmjopen-2019-030104.R1                                                                                                                                                                                                                                                                                                                                                                                                                                                                                                                                                                                                                                                                                                                                                                                                                                                                                                                                                                                |
| Article Type:                   | Research                                                                                                                                                                                                                                                                                                                                                                                                                                                                                                                                                                                                                                                                                                                                                                                                                                                                                                                                                                                              |
| Date Submitted by the Author:   | 01-Jun-2019                                                                                                                                                                                                                                                                                                                                                                                                                                                                                                                                                                                                                                                                                                                                                                                                                                                                                                                                                                                           |
| Complete List of Authors:       | Wabe, Nasir; Macquarie University, Centre for Health Systems and Safety Research, Australian Institute of Health Innovation<br>Li, Ling; Macquarie University, Centre for Health Systems and Safety Research, Australian Institute of Health Innovation<br>Dahm, Maria; Macquarie University, Centre for Health Systems and Safety Research, Australian Institute of Health Innovation<br>Lindeman, Robert; NSW Health Pathology<br>Yimsung, Ruth; NSW Health Pathology<br>Clezy, Kate; Prince of Wales Hospital, Infectious Diseases Department<br>Thomas, Judith; Macquarie University, Centre for Health Systems and Safety Research, Australian Institute of Health Innovation<br>Varndell, Wayne ; Prince of Wales Hospital<br>Westbrook, Johanna; Macquarie University, Centre for Health Systems and Safety Research, Australian Institute of Health Innovation<br>Georgiou, A; Macquarie University, Centre for Health Systems and Safety Research, Australian Institute of Health Innovation |
| <b>Primary Subject Heading</b>: | Infectious diseases                                                                                                                                                                                                                                                                                                                                                                                                                                                                                                                                                                                                                                                                                                                                                                                                                                                                                                                                                                                   |
| Secondary Subject Heading:      | Emergency medicine, Diagnostics                                                                                                                                                                                                                                                                                                                                                                                                                                                                                                                                                                                                                                                                                                                                                                                                                                                                                                                                                                       |
| Keywords:                       | Diagnostic microbiology < INFECTIOUS DISEASES, Infection control < INFECTIOUS DISEASES, Molecular diagnostics < INFECTIOUS DISEASES                                                                                                                                                                                                                                                                                                                                                                                                                                                                                                                                                                                                                                                                                                                                                                                                                                                                   |
|                                 |                                                                                                                                                                                                                                                                                                                                                                                                                                                                                                                                                                                                                                                                                                                                                                                                                                                                                                                                                                                                       |

SCHOLARONE™  
Manuscripts

1  
2  
3 **The timing of respiratory virus molecular testing in emergency departments and its**  
4 **association with patient care outcomes: A retrospective observational study across six**  
5 **Australian hospitals**  
6  
7  
8  
9

10 **Authors:** Nasir Wabe<sup>1\*</sup>, Ling Li<sup>1</sup>, Mary R Dahm<sup>1</sup>, Robert Lindeman<sup>2</sup>, Ruth Yimsung<sup>2</sup>, Kate  
11 Clezy<sup>3</sup>, Judith Thomas<sup>1</sup>, Wayne Varndell<sup>4,5</sup>, Johanna I Westbrook<sup>1</sup>, Andrew Georgiou<sup>1</sup>  
12  
13  
14  
15

16 **Authors Affiliations:**  
17  
18

19 <sup>1</sup>Centre for Health Systems and Safety Research, Australian Institute of Health Innovation,  
20 Macquarie University, North Ryde NSW 2109, Australia;  
21  
22

23 <sup>2</sup>NSW Health Pathology, Chatswood NSW 2067, Australia;  
24  
25

26 <sup>3</sup>Infectious Diseases Department, Prince of Wales Hospital, Randwick NSW 2031, Australia;  
27  
28

29 <sup>4</sup>Emergency Department, Prince of Wales Hospital, Randwick NSW 2031, Australia;  
30  
31

32 <sup>5</sup>Faculty of Health, University of Technology Sydney, Australia  
33  
34

35 **\*Corresponding Author**  
36  
37

38 **Address:** Centre for Health Systems and Safety Research, Australian Institute of Health  
39 Innovation, Macquarie University, North Ryde NSW 2109, Australia  
40  
41

42 **T:** +61 (2) 9850 2442 | **M:** + 61 470 771 915  
43  
44

45 **F:** +61 (2) 9850 2499 | **E:** [nasir.wabe@mq.edu.au](mailto:nasir.wabe@mq.edu.au)  
46  
47

48 **Running Title:** The timing of respiratory virus testing and patient outcomes in ED  
49  
50

51 **Key words:** Influenza, timing of testing, rapid PCR, molecular diagnostics, respiratory virus  
52  
53

54 **Word count:** 2,624  
55  
56

57 **Word count abstract:** 278  
58  
59

60 **Total number of figures and table:** 4 tables and 1 figure

## Abstract

**Objective:** A rapid molecular diagnostic test (RMDT) offers a fast and accurate detection of respiratory viruses, but its impact on the timeliness of care in the emergency department (ED) may depend on the timing of the test. The aim of the study was to determine if the timing of respiratory virus testing using a RMDT in the ED had an association with patient care outcomes.

**Design:** Retrospective observational study.

**Setting:** Linked ED and laboratory data from six EDs in New South Wales, Australia.

**Participants:** Adult patients presenting to EDs during the 2017 influenza season and tested for respiratory viruses using a RMDT. The timing of respiratory virus testing was defined as the time from a patient's ED arrival to time of sample receipt at the hospital laboratory.

**Outcome measures:** ED length of stay (LOS), >4-hour ED LOS and having a pending RMDT result at ED disposition.

**Results:** A total of 2168 patients were included. The median timing of respiratory virus testing was 224 minutes (inter-quartile range, 133-349). Every 30-minute increase in the timing of respiratory virus testing was associated with a 24.0-minute increase in the median ED LOS (95% confidence interval [CI], 21.8-26.1;  $P < 0.001$ ), a 51% increase in the likelihood of staying >4 hours in ED (odds ratio [OR], 1.51; 95% CI, 1.41-1.63;  $P < 0.001$ ) and a 4% increase in the likelihood of having a pending RMDT result at ED disposition (OR, 1.04; 95% CI, 1.02-1.05;  $P < 0.001$ ) after adjustment for confounders.

**Conclusion:** The timing of respiratory virus molecular testing in EDs was significantly associated with a range of outcome indicators. Results suggest the potential to maximise the benefits of RMDT by introducing an early diagnostic protocol such as triage-initiated testing.

### Strengths and limitations of this study

- This is the first study to investigate the relationship between the timing of respiratory virus molecular testing and outcomes of patients presenting to ED with respiratory infections.
- This is a large multicentre study that involved six hospitals, enhancing the generalizability of our findings.
- Our findings may not be applicable to paediatric populations as this study did not include patients aged  $\leq 18$  years.
- Being an observational study, our findings do not imply a causal relationship.
- Our analyses were not adjusted for other relevant factors (e.g. access block) which may have confounded the findings of this study.

## Introduction

The accurate diagnosis of the cause of respiratory infections has over recent years depended on a molecular method using a multiplex polymerase chain reaction (PCR) panel testing. Multiplex PCR provides accurate diagnoses, but has been traditionally performed in a central laboratory with a lengthy test turnaround time (TAT), and with major repercussions for the efficiency of emergency department (ED) workflows and care processes.

ED overcrowding has been recognized as a growing problem in Australia and worldwide, contributing to deficits in the performance of the health system.<sup>1-3</sup> Delay in laboratory test results is often considered as one of many factors contributing to ED overcrowding and prolonged ED length of stay (LOS).<sup>4-6</sup> Fast result availability through the use of rapid diagnostic tests can potentially improve patient flow and lessen the burden of ED overcrowding.<sup>7,8</sup> Optimising patient flow is of particular importance given the 4-hour ED LOS target introduced in Australia in 2011 to improve the quality and timeliness of care across EDs.<sup>9</sup>

Diagnostic kits for the rapid diagnosis of respiratory viruses using a molecular PCR-based technology are now available for use in hospital-based laboratories. Existing evidence shows that RMDT in ED is associated with a significant decrease in hospital admissions<sup>8,10</sup>, shorter TAT<sup>8</sup> and reductions in hospital resource utilisation.<sup>11-13</sup> However, evidence of the association between RMDT and ED LOS have been inconsistent.<sup>8,14,15</sup> Our previous study did not detect a significant association between RMDT use and ED LOS.<sup>16</sup> We hypothesised that this may be due to the fact that RMDT ordering took place a median of three hrs after a patient's ED arrival<sup>16</sup> suggesting that the impact of RMDT on ED LOS and other timeliness of care processes may depend on the timing of the test.

The aim of the study was to determine if the timing of respiratory virus testing using RMDT in ED is associated with indicators related to timeliness of patient care including ED LOS,

meeting the 4-hr ED LOS Australian emergency access target; having a pending RMDT result at ED disposition.

## Method

### Setting

A retrospective observational study was conducted across six public hospitals in New South Wales (NSW), Australia. All study sites provide 24-hour EDs: three principal referral hospitals (EDs A, B and D) with 76,228, 54,443 and 61,348 annual ED presentations respectively, two acute group A hospitals (ED C and ED F) with 50,025 and 38,039 annual ED presentations respectively and one public acute group A hospital (ED E) with 29,479 annual ED presentations (2016 data).<sup>17</sup>

### Population

The study period was the 2017 influenza season, between 1 July and 31 October. The inclusion criteria were patients presenting to EDs with symptoms of respiratory infection and aged  $\geq 18$  years; Australasian triage scale categories of 3 (potentially life-threatening), 4 (potentially serious) or 5 (less urgent) and tested for respiratory viruses at a hospital-based laboratory using a RMDT. The RMDT used in this study was a Cepheid Xpert® Flu/RSV XC (Cepheid, Sunnyvale, CA)<sup>16 18</sup>. The Cepheid Xpert® Flu/RSV XC assay demonstrated a high sensitivity and specificity for rapid detection of influenza A, influenza B and RSV.<sup>19</sup>

Patients with triage categories of 1 (immediately life-threatening) or 2 (imminently life-threatening) were excluded from the current analysis as patients required urgent medical assessment and treatment. Relevant patient presentation characteristics and laboratory test data were obtained by linking the ED and laboratory information system datasets.<sup>6</sup>

### Outcome measures



1  
2  
3 The primary outcome was ED LOS. ED LOS was defined as the length of time between ED  
4 arrival and patient disposition. The secondary outcomes included >4-hour ED LOS and having  
5 a pending RMDT result at ED disposition. A pending test result was defined as the  
6 unavailability of a verified RMDT result at the time of patient disposition from the ED.<sup>20</sup>  
7  
8  
9  
10  
11  
12

### 13 **Statistical analysis**

14  
15  
16 Descriptive statistics including medians with inter-quartile ranges (IQR) were reported. The  
17 RMDT TAT was defined as the time of sample receipt at the hospital laboratory to time of  
18 availability of RMDT result. The exploratory variable was the timing of respiratory virus  
19 testing using a RMDT, defined as the time from a patient's ED arrival to time of sample receipt  
20 at the hospital laboratory. For result interpretation purposes, the relationship between the  
21 timing of the RMDT and study outcomes were estimated for every 30-minute increase in the  
22 timing of the test.  
23  
24  
25  
26  
27  
28  
29  
30  
31  
32

33 The association between the timing of the RMDT and ED LOS was assessed using a median  
34 regression. As the ED LOS data were highly skewed, commonly used approaches such as  
35 ordinary least squares regression which models the conditional mean of the outcome variable  
36 was not appropriate methods.<sup>21</sup> Median regression is a special type of quantile regression which  
37 estimates the median of the outcome variable conditional on the values of the predictor  
38 variables.<sup>22</sup> It is robust to extreme values and therefore well suited for modelling such data.<sup>23</sup>  
39  
40  
41  
42  
43  
44  
45  
46

47 Binary logistic regression was used to assess the association between the timing of the RMDT  
48 and the secondary outcomes (e.g. >4-hour ED LOS, *yes/no*). The strength of the associations  
49 was measured using odds ratio (OR) with a 95% confidence interval (CI).  
50  
51  
52  
53

54 For all outcomes, the findings were reported for the overall sample and by study ED. Sub-  
55 group analyses by patient disposition and ED arrival time were also conducted. The baseline  
56 covariates included age, gender, triage category, arrival time, arrival day of week, mode of  
57  
58  
59  
60

1  
2  
3 arrival, patient disposition, overall number of tests ordered and number of test order episodes  
4  
5 (tests ordered at one point in time during the ED stay). All analyses were adjusted for potential  
6  
7 confounders – any variable having a significant association with a given outcome in a  
8  
9 univariate analysis ( $P < 0.05$ ) was selected for the multivariate model. P-values were 2-tailed  
10  
11 and  $P < 0.05$  was considered statistically significant. Analyses were conducted using Stata  
12  
13 version 15 (StataCorp LP, College Station, TX).  
14  
15

### 16 17 **Patient and public involvement**

18  
19 This study was conducted without patient and public involvement as it was a retrospective  
20  
21 study conducted using pre-existing administrative data. The patients were not invited to  
22  
23 comment on the study design and were not consulted to develop outcomes or interpret the  
24  
25 results. Patients were not invited to contribute to the writing or editing of this document for  
26  
27 readability or accuracy.  
28  
29  
30  
31

### 32 33 **Results**

#### 34 35 **Baseline characteristics**

36  
37 A total of 2,168 patients were included in the study. Table 1 presents baseline characteristics.  
38  
39 The median patient age was 74 years and 55.2% (n=1,196) were female (Table 1). Overall,  
40  
41 there were 16,321 pathology tests ordered (i.e. RMDT and other tests combined) with medians  
42  
43 of 3 test order episodes during the ED stay and 7 tests per patient. Analysis of RMDT results  
44  
45 showed that 28.9% (n=626) were positive for either influenza A/B (n=617) or RSV (n=9). No  
46  
47 patients tested positive for both influenza and RSV. The overall median TAT of RMDT was  
48  
49 183 minutes but this ranged from 104 minutes at ED A to 622 minutes at ED F.  
50  
51  
52  
53  
54

55  
56 **Table 1: Baseline characteristics.**

| Variables | Result (N=2,168) |
|-----------|------------------|
|-----------|------------------|

|                              |              |
|------------------------------|--------------|
| Gender, n (%)                |              |
| Male                         | 972 (44.8)   |
| Female                       | 1,196 (55.2) |
| Age (years), median (IQR)    | 74 (56-84)   |
| Triage scale, n (%)          |              |
| Category 3                   | 1,777 (82.0) |
| Category 4/5                 | 391(18.0)    |
| Arrival time, n (%)          |              |
| 0700hrs to 1900hrs           | 1,528 (70.5) |
| 1900hrs to 0700hrs           | 640 (29.5)   |
| Arrival day of week, n (%)   |              |
| Monday                       | 356 (16.4)   |
| Tuesday                      | 294 (13.6)   |
| Wednesday                    | 327 (15.1)   |
| Thursday                     | 300 (13.8)   |
| Friday                       | 308 (14.2)   |
| Saturday                     | 257 (11.9)   |
| Sunday                       | 326 (15.0)   |
| Mode of arrival, n (%)       |              |
| Private/public transport     | 906 (41.8)   |
| State ambulance <sup>1</sup> | 1,262 (58.2) |
| Study ED, n (%)              |              |
| A                            | 723 (33.4)   |
| B                            | 193 (8.9)    |

|                                     |              |
|-------------------------------------|--------------|
| C                                   | 301 (13.9)   |
| D                                   | 530 (24.5)   |
| E                                   | 239 (11.0)   |
| F                                   | 182 (8.4)    |
| Patient disposition, n (%)          |              |
| Admitted                            | 1,567 (72.3) |
| Discharged                          | 545 (25.1)   |
| Other <sup>2</sup>                  | 56 (2.6)     |
| Test order episode, median (IQR)    | 3 (2-4)      |
| Overall tests ordered, median (IQR) | 7 (5-9)      |
| Test result, n (%)                  |              |
| Positive                            | 626 (28.9)   |
| Negative                            | 1,542 (71.1) |

ED, Emergency Department; <sup>1</sup>Fifteen patients arriving by either wheelchair, correctional services vehicle, helicopter rescue service or walked-in were combined with 'State ambulance'; <sup>2</sup>Transferred to another hospital or left ED at own risk.

### The timing of respiratory virus testing

The median time from ED presentation to respiratory virus testing using the RMDT for all samples was 224 minutes (IQR, 133-349). There was considerable variation in the median time to RMDT across EDs which ranged from 173 minutes (IQR, 108-264) at ED B to 269 minutes (IQR, 178-444) at ED F (Figure 1).

### Study outcomes

The overall median ED LOS was 533 minutes. ED B had the shortest and ED D had the longest median ED LOS. Overall, 88% (n=1,907) of patients stayed >4 hours in ED (range across EDs:

78.2% at ED B to 92.0% at ED A). RMDT results were pending for 38% (n=824) of patients at the time of ED disposition (range across EDs: 15.1% at ED A to 70.7% at ED E) (Table 2).

**Table 2: Summary of study outcomes.**

| ED      | N     | Primary outcome                  | Secondary outcomes       |                                              |
|---------|-------|----------------------------------|--------------------------|----------------------------------------------|
|         |       | ED LOS (minute),<br>Median (IQR) | >4-hour ED LOS,<br>N (%) | Patient with a pending<br>RMDT result, N (%) |
| A       | 723   | 545 (358-953)                    | 665 (92.0)               | 109 (15.1)                                   |
| B       | 193   | 376 (257-549)                    | 151 (78.2)               | 80 (41.5)                                    |
| C       | 301   | 490 (342-859)                    | 263 (87.4)               | 157 (52.2)                                   |
| D       | 530   | 714 (366-1172)                   | 457 (86.2)               | 186 (35.1)                                   |
| E       | 239   | 455 (336-657)                    | 208 (87.0)               | 169 (70.7)                                   |
| F       | 182   | 700 (389-1177)                   | 163 (89.6)               | 123 (67.6)                                   |
| Overall | 2,168 | 533 (338.5-975)                  | 1,907 (88.0)             | 824 (38.0)                                   |

ED, Emergency Department; LOS, Length of Stay.

### **The association between the timing of respiratory virus testing and primary outcome**

The results of univariate analysis describing the association between baseline characteristics and each study outcome are presented in *Supplementary Table 1*. All baseline variables except arrival day of week and test result were significantly associated with ED LOS (Table S1).

The timing of respiratory virus testing was strongly associated with ED LOS. After adjustment for potential confounders, every 30-minute increase in the time to RMDT was associated with a 24.0-minute increase in the median ED LOS (95% CI, 21.8-26.1;  $P<0.001$ ). There were no major differences, in this association, by ED (Table 3).

**Table 3: Median regression showing association between the timing of respiratory virus testing (every 30-minute increase) and ED LOS (minutes).**

| ED      | N     | Unadjusted       | Adjusted <sup>†</sup> |
|---------|-------|------------------|-----------------------|
|         |       | Coef. (95% CI)   | Coef. (95% CI)        |
| A       | 723   | 26.4 (22.2-30.5) | 21.6 (16.5-26.7)      |
| B       | 193   | 32.4 (27.1-37.7) | 26.4 (20.0-32.8)      |
| C       | 301   | 30.9 (26.4-35.4) | 26.7 (22.3-31.2)      |
| D       | 530   | 31.7 (26.1-37.3) | 21.7 (17.7-25.8)      |
| E       | 239   | 25.8 (21.0-30.7) | 26.3 (21.5-31.0)      |
| F       | 182   | 28.0 (19.8-36.1) | 23.2 (14.6-31.8)      |
| Overall | 2,168 | 29.4 (27.5-31.2) | 24.0 (21.8-26.1)      |

All analyses were highly significant with a *P*-value of <0.001. The coefficient indicates the median change in a given outcome (e.g. ED LOS) for every 30-minute increase in the timing of the RMDT. <sup>†</sup>Adjusted for gender, age, triage category, ED arrival time, mode of arrival, study ED, patient disposition, test order episode. ED, Emergency Department; LOS, Length of Stay.

A subgroup analysis by patient disposition and ED arrival time is shown in *Supplementary Table 2*. The association was more pronounced among patients who were subsequently discharged than for admitted patients and among patients who arrived to EDs between 0700hrs to 1900hrs than for patients arriving between 1900hrs to 0700hrs (Table S2).

### **The association between the timing of respiratory virus testing and secondary outcomes**

The median time to RMDT was 113 minutes (IQR, 76-152) for patients with  $\leq 4$  hours ED LOS (n=261) and 250 minutes (IQR, 153-370) for patients staying >4 hours in ED (n=1,907). The median time to RMDT was 211 minutes (IQR, 122-336) for patients who received RMDT results before disposition (n=1,344) and 247 minutes (IQR, 151-364) for patients with pending RMDT results at disposition (n=824). Of the patients with pending RMDT results, the results of 30.3% (n=250) eventually came back positive for either influenza A/B or RSV.

The results of binary logistic regression are presented in Table 4 and show associations between the time to RMDT and secondary outcomes. The time to RMDT was positively associated with

both secondary outcomes. In the adjusted model, for every 30-minute increase in time to RMDT, the likelihood of staying >4 hours in ED (*versus* having  $\leq$ 4 hours ED LOS) increased by a factor of 1.51 (OR, 1.51; 95% CI, 1.41-1.63;  $P<0.001$ ). This is equivalent to a 51% increase in the likelihood of staying >4 hours in ED.

The association between the timing of the RMDT and having a pending test result at ED disposition was not as striking as with other outcomes. In the total sample, for every 30-minute increase in the time to RMDT, the likelihood of experiencing a pending RMDT result at ED disposition increased by a factor of 1.04 – a 4% increase – (OR, 1.04; 95% CI, 1.02-1.05;  $P<0.001$ ) after adjustment for potential confounders. When the analysis was conducted separately by study EDs, the association was not statistically significant for EDs C, D and E (Table 4).

**Table 4: Binary logistic regression showing association between the timing of respiratory virus testing (every 30- minute increase) and secondary outcomes.**

| ED      | N     | > 4-hr ED LOS    |                       | Patient with a pending RMDT result |                                |
|---------|-------|------------------|-----------------------|------------------------------------|--------------------------------|
|         |       | Unadjusted       | Adjusted <sup>†</sup> | Unadjusted                         | Adjusted <sup>††</sup>         |
|         |       | OR (95% CI)      | OR (95% CI)           | OR (95% CI)                        | OR (95% CI)                    |
| A       | 723   | 1.58 (1.37-1.82) | 1.51 (1.28-1.79)      | 1.04 (1.01-1.07)                   | 1.06 (1.03-1.10)               |
| B       | 193   | 1.74 (1.41-2.14) | 1.70 (1.34-2.17)      | 1.06 (1.01-1.12)                   | 1.16 (1.07-1.25)               |
| C       | 301   | 1.51 (1.29-1.76) | 1.48 (1.25-1.75)      | 0.99 (0.96-1.02) <sup>NS</sup>     | 1.02 (0.99-1.06) <sup>NS</sup> |
| D       | 530   | 1.69 (1.48-1.93) | 1.64 (1.41-1.90)      | 0.99 (0.97-1.01) <sup>NS</sup>     | 1.02 (1.00-1.05) <sup>NS</sup> |
| E       | 239   | 1.40 (1.21-1.61) | 1.39 (1.19-1.63)      | 1.00 (0.96-1.04) <sup>NS</sup>     | 1.02 (0.97-1.07) <sup>NS</sup> |
| F       | 182   | 1.63 (1.28-2.07) | 1.90 (1.24-2.91)      | 1.01 (0.98-1.05) <sup>NS</sup>     | 1.05 (1.00-1.09)               |
| Overall | 2,168 | 1.54 (1.45-1.64) | 1.51 (1.41-1.63)      | 1.02 (1.01-1.03)                   | 1.04 (1.02-1.05)               |

1  
2  
3 All analyses, except those marked 'NS', were significant with a *P-value* of <0.05. The coefficient indicates the  
4 likelihood of a given outcome for every 30-minute increase in the timing of the RMDT. †Adjusted for age, triage  
5 category, mode of arrival, study ED, patient disposition, test order episode and test result. ††Adjusted for gender,  
6 age, triage category, mode of arrival, study ED, patient disposition, test order episode. ED, Emergency  
7 Department; NS, Not Significant.  
8  
9  
10  
11

## 12 **Discussion**

### 13 ***Key findings***

14  
15  
16  
17  
18 The major finding of this study is that for every 30-minute increase in the time from ED arrival  
19 until respiratory virus testing there was a 24.0-minute increase in the median ED LOS.  
20  
21 Moreover, an increase in the timing of respiratory virus testing was associated with a greater  
22 likelihood of experiencing an ED LOS greater than four hours and having a pending RMDT  
23 result at the time of disposition from the ED.  
24  
25  
26  
27  
28  
29

### 30 ***Interpretation and comparison with existing literature***

31  
32  
33 Previous studies have also reported a significant association between ED LOS and the time  
34 taken to obtain the results from laboratory testing in EDs.<sup>6 24-26</sup> However, unlike our study, the  
35 previous studies have been conducted in a context of broader patient populations visiting ED  
36 and, therefore, direct comparisons with other studies are not possible. For example, Li *et al.*  
37 conducted a retrospective study that included 123,455 ED presentations for all conditions  
38 across four EDs in NSW, Australia. That study assessed the relationship between ED LOS and  
39 TAT and found a 17-minute increase in ED LOS for each 30-minute increase in TAT.<sup>6</sup> In a  
40 recent large US study, Kaushik *et al.* evaluated the impact of reducing laboratory TAT on ED  
41 LOS using data from 486 hospitals with 4,483,169 ED presentations.<sup>25</sup> In that study, a 1-minute  
42 decrease in TAT was associated with a 0.50-minute decrease in ED LOS.<sup>25</sup> In another US  
43 study, Kocher *et al.* investigated the effect of diagnostic testing and treatment patterns on ED  
44 LOS using data from a large national study that included approximately 360 million ED  
45  
46  
47  
48  
49  
50  
51  
52  
53  
54  
55  
56  
57  
58  
59  
60



1  
2  
3 presentations.<sup>26</sup> They found that, the ordering of a blood test was the most time consuming  
4 testing modality resulting in an adjusted marginal effect of a 72-minute increase in ED LOS  
5 and the likelihood of experiencing a >4-hour ED LOS increased by a factor of 2.29.<sup>26</sup>  
6  
7

8  
9  
10 The present study revealed a direct relationship between the timing of respiratory virus testing  
11 and a range of indicators of timeliness of patient care in ED. Delays in the ordering of RMDT  
12 had a negative impact on our selected ED outcomes. Our results suggest that earlier initiative  
13 of RMDT may result in reduced ED LOS. More systemic or procedural changes in the way  
14 healthcare is delivered (e.g. introduction of an early diagnostic testing protocol such as a triage-  
15 initiated testing) may be needed in order to maximise its benefits. Triage-based testing  
16 protocols have been shown to reduce wait times and ED LOS, decrease costs, reduces time to  
17 receiving medications and improve patient satisfaction in other conditions.<sup>27-29</sup> In an  
18 randomized controlled trial conducted in the US that including more than 1000 ED patients  
19 aged <3years, influenza testing at triage using a non-molecular antigen-based method led to  
20 significantly shorter ED LOS.<sup>30</sup> Future research should assess the potential impact of triage-  
21 initiated ordering of RMDT for patients presenting to ED with suspected respiratory viral  
22 infection on patient outcomes including the effect on ED LOS.  
23  
24  
25  
26  
27  
28  
29  
30  
31  
32  
33  
34  
35  
36  
37  
38  
39  
40

#### 41 ***Implications of the study***

42  
43  
44 The current study showed that a delay in respiratory virus testing was associated with an  
45 increased likelihood of having a pending test result at ED disposition. The test results of 30.3%  
46 of patients with pending test results eventually came back positive for either influenza A/B or  
47 RSV. This finding has significant patient safety implications. Pending test results at discharge  
48 are less likely to be followed-up and may lead to missed or delayed diagnosis and increased  
49 hospital representations.<sup>31 32</sup> From an infection transmission perspective, patients who were  
50  
51  
52  
53  
54  
55  
56  
57  
58  
59  
60

1  
2  
3 discharged with pending results could potentially spread the infection, especially if appropriate  
4 management was not provided.  
5  
6  
7

### 8 ***Strengths and weaknesses of the study***

9  
10  
11 Our study has some strengths. To the best of our knowledge, this is the first study to explore  
12 the relationship between the timing of respiratory virus molecular testing and ED outcomes  
13 among patients presenting with respiratory infections. Another strength of the study was that it  
14 is a multicentre study that involved six hospitals with a large sample size, enhancing the  
15 external validity (generalizability) of our findings.  
16  
17  
18  
19  
20  
21  
22

23 The findings of the current study should be interpreted in the context of the following  
24 methodological limitations. Firstly, this study was conducted among adult patients (age>18  
25 years). Given the impact of RMDT on ED LOS can be different among patients aged≤18 years  
26 <sup>33</sup>, our findings may not be applicable to paediatric populations. Secondly, being an  
27 observational study, the findings of the current study do not imply a causal relationship.  
28 Thirdly, our analyses were not adjusted for other factors which may have confounded the  
29 findings of this study. The input-throughput-output model <sup>34</sup> is commonly used in studies  
30 assessing factors affecting LOS and ED overcrowding.<sup>26 35 36</sup> Input factors are characteristics  
31 that contribute to the demand for ED services (e.g. patient demographics and ED presentation  
32 characteristics).<sup>34</sup> Throughput factors are characteristics related to ED care such as diagnostic  
33 evaluations and treatment.<sup>26 34</sup> Output factors are organisational or hospital capacity-related  
34 characteristics (e.g. access block).<sup>34 36</sup> Whilst our multivariable models were adjusted for a  
35 number of input variables, our current analysis did not consider the effect of several throughput  
36 and output/organisational factors due to lack of data. Previous studies have shown that  
37 throughput factors such as diagnostic imaging <sup>26</sup>, clinical assessment <sup>37</sup> and treatment  
38  
39  
40  
41  
42  
43  
44  
45  
46  
47  
48  
49  
50  
51  
52  
53  
54  
55  
56  
57  
58  
59  
60

(administering a medication or performing a procedure)<sup>26</sup> and output/organisational factors<sup>36</sup>  
<sup>38 39</sup> are important factors influencing ED LOS.

## Conclusion

The timing of respiratory virus molecular testing in EDs was significantly associated with a range of outcome indicators. Results suggest the potential to maximise the benefits of RMDT by introducing an early diagnostic protocol such as a triage-initiated testing which warrants investigations in future studies.

**Patient consent for publication:** Not required.

**Contributors:** AG, LL, MRD, RL, JT and JIW conceived the study and obtained research funding. NW, LL, MRD, RL, RY, KC, JT, WV, JIW and AG have made substantial contributions to the design of the study. NW and LL conducted data extraction, cleaning, linkage and analysis. NW, LL, MRD, RL, KC, JT, JIW and AG involved in the interpretation of the results with input from RY and WV. NW, LL, MRD, JT and AG contributed to the drafting of the manuscript with input from RL, RY, KC and WV. All authors involved in the critical revision of the manuscript for important intellectual content as well as approved the final version to be published.

**Funding:** This work was supported by National Health and Medical Research Council of Australia Partnership Project Grant [grant number, APP1111925].

**Ethical approval:** Ethics approval was granted by the Human Research Ethics Committee of the South Eastern Sydney Local Health District (HREC/16/POWH/412).

**Conflicts of interests:** None declared.

**Data sharing statement:** The data that underline the results reported in this articles are available from the data custodians (South Eastern Sydney and Illawarra Shoalhaven Local

1  
2  
3 Health District), but restrictions apply to the availability of these data, which were used under  
4 license for the current study, and so are not publicly available. The de-identified data however  
5  
6  
7 may be obtained from the corresponding author upon reasonable request and with permission  
8  
9  
10 of the data custodians.  
11

## 12 13 **References**

- 14  
15  
16 1. Wickman L, Svensson P, Djarv T. Effect of crowding on length of stay for common chief  
17  
18 complaints in the emergency department: A STROBE cohort study. *Medicine*  
19  
20 2017;96(44):e8457. doi: 10.1097/md.00000000000008457 [published Online First:  
21  
22 2017/11/03]  
23  
24
- 25 2. Sikka R, Mehta S, Kaucky C, et al. ED crowding is associated with an increased time to  
26  
27 pneumonia treatment. *Am J Emerg Med* 2010;28(7):809-12. doi:  
28  
29 10.1016/j.ajem.2009.06.023 [published Online First: 2010/09/15]  
30  
31
- 32 3. Morley C, Unwin M, Peterson GM, et al. Emergency department crowding: A systematic  
33  
34 review of causes, consequences and solutions. *PLoS One* 2018;13(8):e0203316. doi:  
35  
36 10.1371/journal.pone.0203316 [published Online First: 2018/08/31]  
37  
38
- 39 4. Lewandrowski K. POC testing in the emergency department: Strategies to improve clinical  
40  
41 and operational outcomes. Radiometer Medical ApS, 2700 Brønshøj, Denmark.:  
42  
43 acute-care-testing.org.; 2011 [Available from: [https://acute-care-testing.org/-](https://acute-care-testing.org/-/media/acute-care-testing/files/pdf/poc-testing-in-the-emergency-department-strategies-to-improve-clinical-and-operational-outcomes.pdf)  
44  
45 [/media/acute-care-testing/files/pdf/poc-testing-in-the-emergency-department-strategies-](https://acute-care-testing.org/-/media/acute-care-testing/files/pdf/poc-testing-in-the-emergency-department-strategies-to-improve-clinical-and-operational-outcomes.pdf)  
46  
47 [to-improve-clinical-and-operational-outcomes.pdf](https://acute-care-testing.org/-/media/acute-care-testing/files/pdf/poc-testing-in-the-emergency-department-strategies-to-improve-clinical-and-operational-outcomes.pdf). accessed 30 January 2019.  
48  
49
- 50 5. Pines JM, Hilton JA, Weber EJ, et al. International perspectives on emergency department  
51  
52 crowding. *Academic emergency medicine : official journal of the Society for*  
53  
54 *Academic Emergency Medicine* 2011;18(12):1358-70. doi: 10.1111/j.1553-  
55  
56 2712.2011.01235.x [published Online First: 2011/12/16]  
57  
58  
59  
60

- 1  
2  
3 6. Li L, Georgiou A, Vecellio E, et al. The effect of laboratory testing on emergency  
4  
5 department length of stay: a multihospital longitudinal study applying a cross-  
6  
7 classified random-effect modeling approach. *Academic emergency medicine : official*  
8  
9 *journal of the Society for Academic Emergency Medicine* 2015;22(1):38-46. doi:  
10  
11 10.1111/acem.12565 [published Online First: 2015/01/08]  
12  
13
- 14  
15 7. Rooney KD, Schilling UM. Point-of-care testing in the overcrowded emergency  
16  
17 department—can it make a difference? *Critical Care* 2014;18(6):692.  
18
- 19  
20 8. Rappo U, Schuetz AN, Jenkins SG, et al. Impact of Early Detection of Respiratory Viruses  
21  
22 by Multiplex PCR Assay on Clinical Outcomes in Adult Patients. *Journal of clinical*  
23  
24 *microbiology* 2016;54(8):2096-103. doi: 10.1128/jcm.00549-16 [published Online  
25  
26 First: 2016/05/27]  
27
- 28  
29 9. Sullivan C, Staib A, Khanna S, et al. The National Emergency Access Target (NEAT) and  
30  
31 the 4-hour rule: time to review the target. *The Medical journal of Australia*  
32  
33 2016;204(9):354.  
34
- 35  
36 10. Linehan E, Brennan M, O'Rourke S, et al. Impact of introduction of xpert flu assay for  
37  
38 influenza PCR testing on obstetric patients: a quality improvement project. *The*  
39  
40 *journal of maternal-fetal & neonatal medicine : the official journal of the European*  
41  
42 *Association of Perinatal Medicine, the Federation of Asia and Oceania Perinatal*  
43  
44 *Societies, the International Society of Perinatal Obstet* 2018;31(8):1016-20. doi:  
45  
46 10.1080/14767058.2017.1306048 [published Online First: 2017/03/14]  
47  
48
- 49  
50 11. Ko F, Drews SJ. The impact of commercial rapid respiratory virus diagnostic tests on  
51  
52 patient outcomes and health system utilization. *Expert Review of Molecular*  
53  
54 *Diagnostics* 2017;17(10):917-31. doi: 10.1080/14737159.2017.1372195  
55
- 56  
57 12. Poehling KA, Zhu Y, Tang YW, et al. Accuracy and impact of a point-of-care rapid  
58  
59 influenza test in young children with respiratory illnesses. *Archives of pediatrics &*  
60

- 1  
2  
3 *adolescent medicine* 2006;160(7):713-8. doi: 10.1001/archpedi.160.7.713 [published  
4  
5 Online First: 2006/07/05]  
6  
7
- 8 13. Blaschke AJ, Shapiro DJ, Pavia AT, et al. A National Study of the Impact of Rapid  
9  
10 Influenza Testing on Clinical Care in the Emergency Department. *Journal of the*  
11  
12 *Pediatric Infectious Diseases Society* 2014;3(2):112-8. doi: 10.1093/jpids/pit071  
13  
14 [published Online First: 2014/05/30]  
15  
16
- 17 14. Jeong HW, Heo JY, Park JS, et al. Effect of the influenza virus rapid antigen test on a  
18  
19 physician's decision to prescribe antibiotics and on patient length of stay in the  
20  
21 emergency department. *PLoS One* 2014;9(11):e110978. doi:  
22  
23 10.1371/journal.pone.0110978 [published Online First: 2014/11/07]  
24  
25
- 26 15. Doan Q, Enarson P, Kisson N, et al. Rapid viral diagnosis for acute febrile respiratory  
27  
28 illness in children in the Emergency Department. *The Cochrane database of*  
29  
30 *systematic reviews* 2014(9):Cd006452. doi: 10.1002/14651858.CD006452.pub4  
31  
32 [published Online First: 2014/09/16]  
33  
34
- 35 16. Wabe N, Li L, Lindeman R, et al. The impact of rapid molecular diagnostic testing for  
36  
37 respiratory viruses on outcomes for emergency department patients. *The Medical*  
38  
39 *journal of Australia* 2019;210(7):316-20. doi: 10.5694/mja2.50049 [published Online  
40  
41 First: 2019/03/07]  
42  
43
- 44 17. Dahm MR, Georgiou A, Westbrook JI, et al. Delivering safe and effective test-result  
45  
46 communication, management and follow-up: a mixed-methods study protocol. *BMJ*  
47  
48 *open* 2018;8(2):e020235. doi: 10.1136/bmjopen-2017-020235 [published Online  
49  
50 First: 2018/02/17]  
51  
52
- 53 18. Wabe N, Li L, Lindeman R, et al. Impact of Rapid Molecular Diagnostic Testing of  
54  
55 Respiratory Viruses on Outcomes of Adults Hospitalized with Respiratory Illness: a  
56  
57  
58  
59  
60

- 1  
2  
3 Multicenter Quasi-experimental Study. *Journal of clinical microbiology*  
4  
5 2019;57(4):e01727-18. doi: 10.1128/JCM.01727-18  
6  
7
- 8 19. Arbefeville S, Thonen-Kerr E, Ferrieri P. Prospective and Retrospective Evaluation of the  
9  
10 Performance of the FDA-Approved Cepheid Xpert Flu/RSV XC Assay. *Lab Med*  
11  
12 2017;48(4):e53-e56. doi: 10.1093/labmed/lmx038 [published Online First:  
13  
14 2017/10/17]  
15  
16
- 17 20. Wabe N, Li L, Sezgin G, et al. Pending Laboratory Test Results at the Time of Discharge:  
18  
19 A 3-Year Retrospective Comparison of Paper Versus Electronic Test Ordering in  
20  
21 Three Emergency Departments. *Studies in health technology and informatics*  
22  
23 2018;252:164-69. [published Online First: 2018/07/25]  
24  
25
- 26 21. Le Cook B, Manning WG. Thinking beyond the mean: a practical guide for using quantile  
27  
28 regression methods for health services research. *Shanghai archives of psychiatry*  
29  
30 2013;25(1):55-9. doi: 10.3969/j.issn.1002-0829.2013.01.011 [published Online First:  
31  
32 2013/02/01]  
33  
34
- 35 22. McGreevy KM, Lipsitz SR, Linder JA, et al. Using median regression to obtain adjusted  
36  
37 estimates of central tendency for skewed laboratory and epidemiologic data. *Clinical*  
38  
39 *chemistry* 2009;55(1):165-9. doi: 10.1373/clinchem.2008.106260 [published Online  
40  
41 First: 2008/11/26]  
42  
43
- 44 23. Lee AH, Fung WK, Fu B. Analyzing hospital length of stay: mean or median regression?  
45  
46 *Medical care* 2003;41(5):681-6. doi: 10.1097/01.Mlr.0000062550.23101.6f  
47  
48 [published Online First: 2003/04/30]  
49  
50
- 51 24. Holland LL, Smith LL, Blick KE. Reducing laboratory turnaround time outliers can  
52  
53 reduce emergency department patient length of stay: an 11-hospital study. *American*  
54  
55 *journal of clinical pathology* 2005;124(5):672-74.  
56  
57  
58  
59  
60

- 1  
2  
3 25. Kaushik N, Khangulov VS, O'Hara M, et al. Reduction in laboratory turnaround time  
4  
5 decreases emergency room length of stay. *Open access emergency medicine: OAEM*  
6  
7 2018;10:37.  
8  
9
- 10 26. Kocher KE, Meurer WJ, Desmond JS, et al. Effect of testing and treatment on emergency  
11  
12 department length of stay using a national database. *Academic emergency medicine :  
13  
14 official journal of the Society for Academic Emergency Medicine* 2012;19(5):525-34.  
15  
16 doi: 10.1111/j.1553-2712.2012.01353.x [published Online First: 2012/05/19]  
17  
18
- 19 27. Wiler JL, Gentle C, Halfpenny JM, et al. Optimizing emergency department front-end  
20  
21 operations. *Annals of emergency medicine* 2010;55(2):142-60.e1. doi:  
22  
23 10.1016/j.annemergmed.2009.05.021 [published Online First: 2009/06/27]  
24  
25
- 26 28. Oredsson S, Jonsson H, Rognes J, et al. A systematic review of triage-related  
27  
28 interventions to improve patient flow in emergency departments. *Scandinavian  
29  
30 journal of trauma, resuscitation and emergency medicine* 2011;19:43. doi:  
31  
32 10.1186/1757-7241-19-43 [published Online First: 2011/07/21]  
33  
34
- 35 29. Barksdale AN, Hackman JL, Williams K, et al. ED triage pain protocol reduces time to  
36  
37 receiving analgesics in patients with painful conditions. *Am J Emerg Med*  
38  
39 2016;34(12):2362-66. doi: 10.1016/j.ajem.2016.08.051 [published Online First:  
40  
41 2016/09/25]  
42  
43
- 44 30. Abanses JC, Dowd MD, Simon SD, et al. Impact of rapid influenza testing at triage on  
45  
46 management of febrile infants and young children. *Pediatric emergency care*  
47  
48 2006;22(3):145-9. [published Online First: 2006/04/22]  
49  
50
- 51 31. Callen J, Georgiou A, Li J, et al. The safety implications of missed test results for  
52  
53 hospitalised patients: a systematic review. *BMJ quality & safety* 2011;20(2):194-9.  
54  
55 doi: 10.1136/bmjqs.2010.044339 [published Online First: 2011/02/09]  
56  
57  
58  
59  
60



- 1  
2  
3 32. Roy CL, Poon EG, Karson AS, et al. Patient safety concerns arising from test results that  
4 return after hospital discharge. *Annals of internal medicine* 2005;143(2):121-8.  
5  
6 [published Online First: 2005/07/20]  
7  
8  
9  
10 33. Wabe N, Li L, Lindeman R, et al. Association of rapid molecular diagnostic testing of  
11 respiratory viruses with emergency department patient and laboratory outcomes: A  
12 before-after study. *Medical Journal of Australia* 2018;In press (accepted 12  
13 November 2018)  
14  
15  
16  
17  
18  
19 34. Asplin BR, Magid DJ, Rhodes KV, et al. A conceptual model of emergency department  
20 crowding. *Annals of emergency medicine* 2003;42(2):173-80. doi:  
21 10.1067/mem.2003.302 [published Online First: 2003/07/29]  
22  
23  
24  
25  
26 35. Doupe M, Chateau D, Derksen S, et al. Factors affecting emergency department waiting  
27 room times in Winnipeg: Manitoba Centre for Health Policy, University of Manitoba  
28 2017.  
29  
30  
31  
32  
33 36. Bashkin O, Caspi S, Haligoa R, et al. Organizational factors affecting length of stay in the  
34 emergency department: initial observational study. *Israel journal of health policy  
35 research* 2015;4:38. doi: 10.1186/s13584-015-0035-6 [published Online First:  
36 2015/10/17]  
37  
38  
39  
40  
41  
42 37. Yoon P, Steiner I, Reinhardt G. Analysis of factors influencing length of stay in the  
43 emergency department. *Cjem* 2003;5(3):155-61. [published Online First: 2007/05/03]  
44  
45  
46  
47 38. Forero R, McCarthy S, Hillman K. Access block and emergency department  
48 overcrowding. *Critical care (London, England)* 2011;15(2):216. doi: 10.1186/cc9998  
49 [published Online First: 2011/04/05]  
50  
51  
52  
53 39. Fatovich DM, Nagree Y, Sprivulis P. Access block causes emergency department  
54 overcrowding and ambulance diversion in Perth, Western Australia. *Emergency  
55 Medicine Journal* 2005;22(5):351-54. doi: 10.1136/emj.2004.018002  
56  
57  
58  
59  
60

### Figure's Legend

**Figure 1: The time to RMDT by study EDs:** Boxes represent the IQR (25<sup>th</sup> and 75<sup>th</sup> percentiles) with the median (50<sup>th</sup> percentile) value within the boxes, the mean value is represented as a '+' and the capped bars represent the 10<sup>th</sup> and 90<sup>th</sup> percentiles. The broken line indicates the overall median time to RMDT.

For peer review only

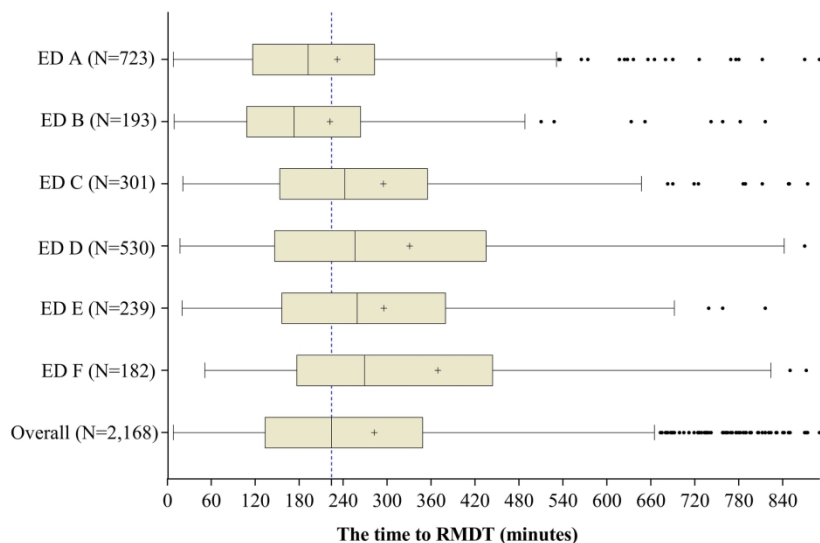

Figure 1: The time to RMDT by study EDs: Boxes represent the IQR (25th and 75th percentiles) with the median (50th percentile) value within the boxes, the mean value is represented as a '+' and the capped bars represent the 10th and 90th percentiles. The broken line indicates the overall median time to RMDT.

214x124mm (300 x 300 DPI)

## Supplementary Data

Table S1: Univariate analysis showing variables associated with primary and secondary outcomes (N=2,168).

| Variables                                 | ED LOS<br>(min)                 | > 4-hr ED LOS                  | Patient with a pending RMDT<br>result |
|-------------------------------------------|---------------------------------|--------------------------------|---------------------------------------|
|                                           | Coef. (95% CI)                  | OR (95% CI)                    | OR (95% CI)                           |
| Female vs. Male                           | -75 (-119.6 to -30.4)           | 0.82 (0.63-1.07) <sup>NS</sup> | 1.26 (1.06-1.51)                      |
| Age (for every 10-year increase)          | 51.2 (40.5 to 61.9)             | 1.38 (1.3-1.46)                | 0.86 (0.82-0.90)                      |
| Triage                                    |                                 |                                |                                       |
| Semi-urgent vs. Urgent                    | -123 (-179.8 to -66.2)          | 0.43 (0.32-0.58)               | 1.66 (1.33-2.07)                      |
| Arrival time                              |                                 |                                |                                       |
| 0700hrs to 1900hrs vs. 1900hrs to 0700hrs | -188 (-233.6 to -142.4)         | 0.75 (0.56-1.01) <sup>NS</sup> | 0.97 (0.80-1.17) <sup>NS</sup>        |
| Arrival day of week                       |                                 |                                |                                       |
| Weekdays vs. Weekends                     | 8 (-39.8 to 55.8) <sup>NS</sup> | 1.06 (0.80-1.42) <sup>NS</sup> | 1.01 (0.83-1.22) <sup>NS</sup>        |
| Mode of arrival                           |                                 |                                |                                       |
| Ambulance vs. private/public transport    | 224 (180.6 to 267.4)            | 3.76 (2.85-4.98)               | 0.63 (0.53-0.76)                      |
| Study ED                                  |                                 |                                |                                       |

|                                               |                                    |                                |                                |
|-----------------------------------------------|------------------------------------|--------------------------------|--------------------------------|
| A                                             | Ref                                | Ref                            | Ref                            |
| B                                             | -169 (-257.7 to -80.3)             | 0.31 (0.20-0.48)               | 3.99 (2.81-5.67)               |
| C                                             | -55 (-130.1 to 20.1) <sup>NS</sup> | 0.60 (0.39-0.93)               | 6.14 (4.53-8.33)               |
| D                                             | 169 (106.4 to 231.6)               | 0.55 (0.38-0.79)               | 3.05 (2.32-3.99)               |
| E                                             | -90 (-171.6 to -8.4)               | 0.59 (0.37-0.93)               | 13.60 (9.63-19.20)             |
| F                                             | 162 (71.3 to 252.7)                | 0.75 (0.43-1.29) <sup>NS</sup> | 11.74 (8.10-17.02)             |
| Patient disposition                           |                                    |                                |                                |
| Discharged vs. Admitted                       | -325 (-380.3 to -269.7)            | 0.17 (0.13-0.22)               | 2.41 (1.97-2.94)               |
| Test order episode                            | 120.6 (109.1 to 132.0)             | 2.58 (2.23-2.99)               | 0.83 (0.79-0.88)               |
| No. of tests (for every 3 more tests ordered) | 167.6 (149.5 to 185.7)             | 3.3 (2.78-3.93)                | 0.85 (0.78-0.92)               |
| Test result                                   |                                    |                                |                                |
| Positive vs. Negative                         | -39 (-85.5 to 7.5) <sup>NS</sup>   | 0.71 (0.54-0.94)               | 1.12 (0.93-1.36) <sup>NS</sup> |

ED, Emergency Department; RMDT, Rapid Molecular Diagnostic Test; LOS, Length of Stay; NS, Not Significant.

**Table S2: Multivariate analysis showing the association between the timing of respiratory virus testing (every 30-min increase) with study outcomes by patient disposition and ED arrival time.**

| Variable            | N     | ED LOS<br>(min) <sup>†</sup> | > 4-hr ED LOS <sup>††</sup> | Patient with a pending RMDT<br>result <sup>†††</sup> |
|---------------------|-------|------------------------------|-----------------------------|------------------------------------------------------|
|                     |       | Coef. (95% CI)               | OR (95% CI)                 | OR (95% CI)                                          |
| Patient disposition |       |                              |                             |                                                      |
| Discharged          | 545   | 28.0 (25.6-30.4)             | 1.68 (1.48-1.91)            | 1.09 (1.03-1.14)                                     |
| Admitted            | 1,567 | 22.3 (19.4-25.2)             | 1.44 (1.32-1.58)            | 1.04 (1.02-1.05)                                     |
| ED arrival time     |       |                              |                             |                                                      |
| 0700hrs to 1900hrs  | 1,528 | 26.6 (24.3-29.0)             | 1.49 (1.37-1.62)            | 1.03 (1.01-1.04)                                     |
| 1900hrs to 0700hrs  | 640   | 17.8 (13.4-22.0)             | 1.58 (1.37-1.81)            | 1.06 (1.03-1.09)                                     |

All analyses were significant with a *P-value* of <0.001. ED, Emergency Department; RMDT, Rapid Molecular Diagnostic Test; LOS, Length of Stay; <sup>†</sup>Adjusted for gender, age, triage category, mode of arrival, study ED, test order episode; <sup>††</sup>Adjusted for age, arrival day of week, mode of arrival, study ED and test order episode; <sup>†††</sup>Adjusted for gender, age, triage category, mode of arrival, study ED and test order episode.

**The RECORD statement – checklist of items, extended from the STROBE statement, that should be reported in observational studies using routinely collected health data.**

|                           | Item No. | STROBE items                                                                                                                                                                               | Location in manuscript where items are reported | RECORD items                                                                                                                                                                                                                                                                                                                                                                                                                                | Location in manuscript where items are reported                                    |
|---------------------------|----------|--------------------------------------------------------------------------------------------------------------------------------------------------------------------------------------------|-------------------------------------------------|---------------------------------------------------------------------------------------------------------------------------------------------------------------------------------------------------------------------------------------------------------------------------------------------------------------------------------------------------------------------------------------------------------------------------------------------|------------------------------------------------------------------------------------|
| <b>Title and abstract</b> |          |                                                                                                                                                                                            |                                                 |                                                                                                                                                                                                                                                                                                                                                                                                                                             |                                                                                    |
|                           | 1        | (a) Indicate the study's design with a commonly used term in the title or the abstract (b) Provide in the abstract an informative and balanced summary of what was done and what was found | a=page 1<br>b=page 2                            | RECORD 1.1: The type of data used should be specified in the title or abstract. When possible, the name of the databases used should be included.<br><br>RECORD 1.2: If applicable, the geographic region and timeframe within which the study took place should be reported in the title or abstract.<br><br>RECORD 1.3: If linkage between databases was conducted for the study, this should be clearly stated in the title or abstract. | 1.1=page 2 ('Setting')<br><br>1.2=page 2 ('Setting')<br><br>1.3=page 2 ('Setting') |
| <b>Introduction</b>       |          |                                                                                                                                                                                            |                                                 |                                                                                                                                                                                                                                                                                                                                                                                                                                             |                                                                                    |
| Background rationale      | 2        | Explain the scientific background and rationale for the investigation being reported                                                                                                       | Page 4                                          |                                                                                                                                                                                                                                                                                                                                                                                                                                             |                                                                                    |
| Objectives                | 3        | State specific objectives, including any prespecified hypotheses                                                                                                                           | Pages 4 and 5                                   |                                                                                                                                                                                                                                                                                                                                                                                                                                             |                                                                                    |
| <b>Methods</b>            |          |                                                                                                                                                                                            |                                                 |                                                                                                                                                                                                                                                                                                                                                                                                                                             |                                                                                    |
| Study Design              | 4        | Present key elements of study design early in the paper                                                                                                                                    | Page 5                                          |                                                                                                                                                                                                                                                                                                                                                                                                                                             |                                                                                    |
| Setting                   | 5        | Describe the setting, locations, and relevant dates, including periods of recruitment, exposure, follow-up, and data collection                                                            | Page 5                                          |                                                                                                                                                                                                                                                                                                                                                                                                                                             |                                                                                    |

|                                                                                                                                                                                                            |          |                                                                                                                                                                                                                                                                                                                                                                                                                                                                                                                                                                                                                                                                                                                        |                |                                                                                                                                                                                                                                                                                                                                                                                                                                                                                                                                                                                                                                                                                                      |                                                                                                                                                                         |
|------------------------------------------------------------------------------------------------------------------------------------------------------------------------------------------------------------|----------|------------------------------------------------------------------------------------------------------------------------------------------------------------------------------------------------------------------------------------------------------------------------------------------------------------------------------------------------------------------------------------------------------------------------------------------------------------------------------------------------------------------------------------------------------------------------------------------------------------------------------------------------------------------------------------------------------------------------|----------------|------------------------------------------------------------------------------------------------------------------------------------------------------------------------------------------------------------------------------------------------------------------------------------------------------------------------------------------------------------------------------------------------------------------------------------------------------------------------------------------------------------------------------------------------------------------------------------------------------------------------------------------------------------------------------------------------------|-------------------------------------------------------------------------------------------------------------------------------------------------------------------------|
| <p>1<br/>2<br/>3<br/>4<br/>5<br/>6<br/>7<br/>8<br/>9<br/>10<br/>11<br/>12<br/>13<br/>14<br/>15<br/>16<br/>17<br/>18<br/>19<br/>20<br/>21<br/>22<br/>23<br/>24<br/>25<br/>26<br/>27</p> <p>Participants</p> | <p>6</p> | <p>(a) <i>Cohort study</i> - Give the eligibility criteria, and the sources and methods of selection of participants. Describe methods of follow-up<br/> <i>Case-control study</i> - Give the eligibility criteria, and the sources and methods of case ascertainment and control selection. Give the rationale for the choice of cases and controls<br/> <i>Cross-sectional study</i> - Give the eligibility criteria, and the sources and methods of selection of participants</p> <p>(b) <i>Cohort study</i> - For matched studies, give matching criteria and number of exposed and unexposed<br/> <i>Case-control study</i> - For matched studies, give matching criteria and the number of controls per case</p> | <p>Page 5.</p> | <p>RECORD 6.1: The methods of study population selection (such as codes or algorithms used to identify subjects) should be listed in detail. If this is not possible, an explanation should be provided.</p> <p>RECORD 6.2: Any validation studies of the codes or algorithms used to select the population should be referenced. If validation was conducted for this study and not published elsewhere, detailed methods and results should be provided.</p> <p>RECORD 6.3: If the study involved linkage of databases, consider use of a flow diagram or other graphical display to demonstrate the data linkage process, including the number of individuals with linked data at each stage.</p> | <p>The study was retrospective observational study as detailed in Page 5</p> <p>Not applicable</p> <p>Separate reference was provided regarding the linkage process</p> |
| <p>28<br/>29<br/>30<br/>31<br/>32<br/>33<br/>34</p> <p>Variables</p>                                                                                                                                       | <p>7</p> | <p>Clearly define all outcomes, exposures, predictors, potential confounders, and effect modifiers. Give diagnostic criteria, if applicable.</p>                                                                                                                                                                                                                                                                                                                                                                                                                                                                                                                                                                       | <p>Page 6</p>  | <p>RECORD 7.1: A complete list of codes and algorithms used to classify exposures, outcomes, confounders, and effect modifiers should be provided. If these cannot be reported, an explanation should be provided.</p>                                                                                                                                                                                                                                                                                                                                                                                                                                                                               |                                                                                                                                                                         |
| <p>35<br/>36<br/>37<br/>38<br/>39<br/>40<br/>41<br/>42</p> <p>Data sources/<br/>measurement</p>                                                                                                            | <p>8</p> | <p>For each variable of interest, give sources of data and details of methods of assessment (measurement). Describe comparability of assessment methods if there is more than one group</p>                                                                                                                                                                                                                                                                                                                                                                                                                                                                                                                            | <p>Page 5</p>  |                                                                                                                                                                                                                                                                                                                                                                                                                                                                                                                                                                                                                                                                                                      |                                                                                                                                                                         |



|                                                                                                                                                                                  |                        |    |                                                                                                                                                                                                                                                                                                                                                                                                                                                                                                                                                                      |                                                                                  |  |  |
|----------------------------------------------------------------------------------------------------------------------------------------------------------------------------------|------------------------|----|----------------------------------------------------------------------------------------------------------------------------------------------------------------------------------------------------------------------------------------------------------------------------------------------------------------------------------------------------------------------------------------------------------------------------------------------------------------------------------------------------------------------------------------------------------------------|----------------------------------------------------------------------------------|--|--|
| 1<br>2<br>3<br>4<br>5                                                                                                                                                            | Bias                   | 9  | Describe any efforts to address potential sources of bias                                                                                                                                                                                                                                                                                                                                                                                                                                                                                                            | Not described directly but effort was made to describe potential confounders     |  |  |
| 6<br>7<br>8<br>9<br>10<br>11                                                                                                                                                     | Study size             | 10 | Explain how the study size was arrived at                                                                                                                                                                                                                                                                                                                                                                                                                                                                                                                            | Page 5 –the study included all participants who fulfilled the inclusion criteria |  |  |
| 12<br>13<br>14<br>15<br>16<br>17                                                                                                                                                 | Quantitative variables | 11 | Explain how quantitative variables were handled in the analyses. If applicable, describe which groupings were chosen, and why                                                                                                                                                                                                                                                                                                                                                                                                                                        | Pages 5 and 6                                                                    |  |  |
| 18<br>19<br>20<br>21<br>22<br>23<br>24<br>25<br>26<br>27<br>28<br>29<br>30<br>31<br>32<br>33<br>34<br>35<br>36<br>37<br>38<br>39<br>40<br>41<br>42<br>43<br>44<br>45<br>46<br>47 | Statistical methods    | 12 | (a) Describe all statistical methods, including those used to control for confounding<br>(b) Describe any methods used to examine subgroups and interactions<br>(c) Explain how missing data were addressed<br>(d) <i>Cohort study</i> - If applicable, explain how loss to follow-up was addressed<br><i>Case-control study</i> - If applicable, explain how matching of cases and controls was addressed<br><i>Cross-sectional study</i> - If applicable, describe analytical methods taking account of sampling strategy<br>(e) Describe any sensitivity analyses | Pages 5 and 6                                                                    |  |  |

|                                                                                        |                                  |                                                                                     |                                                                                                                                                                                                                                                                                                                        |                                                                                                                                                                                                                                                              |                                                                                                                                                                                                                                                                                                                    |
|----------------------------------------------------------------------------------------|----------------------------------|-------------------------------------------------------------------------------------|------------------------------------------------------------------------------------------------------------------------------------------------------------------------------------------------------------------------------------------------------------------------------------------------------------------------|--------------------------------------------------------------------------------------------------------------------------------------------------------------------------------------------------------------------------------------------------------------|--------------------------------------------------------------------------------------------------------------------------------------------------------------------------------------------------------------------------------------------------------------------------------------------------------------------|
| 1<br>2<br>3<br>4<br>5<br>6<br>7<br>8<br>9                                              | Data access and cleaning methods | .. Separate reference was provided regarding the data cleaning and linkage process. |                                                                                                                                                                                                                                                                                                                        | RECORD 12.1: Authors should describe the extent to which the investigators had access to the database population used to create the study population.<br><br>RECORD 12.2: Authors should provide information on the data cleaning methods used in the study. |                                                                                                                                                                                                                                                                                                                    |
| 10<br>11<br>12<br>13<br>14<br>15<br>16<br>17<br>18                                     | Linkage                          | .. Separate reference was provided regarding the data cleaning and linkage process. |                                                                                                                                                                                                                                                                                                                        | RECORD 12.3: State whether the study included person-level, institutional-level, or other data linkage across two or more databases. The methods of linkage and methods of linkage quality evaluation should be provided.                                    |                                                                                                                                                                                                                                                                                                                    |
| 19                                                                                     | <b>Results</b>                   |                                                                                     |                                                                                                                                                                                                                                                                                                                        |                                                                                                                                                                                                                                                              |                                                                                                                                                                                                                                                                                                                    |
| 20<br>21<br>22<br>23<br>24<br>25<br>26<br>27<br>28<br>29<br>30<br>31<br>32             | Participants                     | 13                                                                                  | (a) Report the numbers of individuals at each stage of the study ( <i>e.g.</i> , numbers potentially eligible, examined for eligibility, confirmed eligible, included in the study, completing follow-up, and analysed)<br>(b) Give reasons for non-participation at each stage.<br>(c) Consider use of a flow diagram | Page 7                                                                                                                                                                                                                                                       | RECORD 13.1: Describe in detail the selection of the persons included in the study ( <i>i.e.</i> , study population selection) including filtering based on data quality, data availability and linkage. The selection of included persons can be described in the text and/or by means of the study flow diagram. |
| 33<br>34<br>35<br>36<br>37<br>38<br>39<br>40<br>41<br>42<br>43<br>44<br>45<br>46<br>47 | Descriptive data                 | 14                                                                                  | (a) Give characteristics of study participants ( <i>e.g.</i> , demographic, clinical, social) and information on exposures and potential confounders<br>(b) Indicate the number of participants with missing data for each variable of interest                                                                        | Pages 7 and 8                                                                                                                                                                                                                                                |                                                                                                                                                                                                                                                                                                                    |

|                   |    |                                                                                                                                                                                                                                                                                                                                                                                                                 |                    |                                                                                                                                             |  |
|-------------------|----|-----------------------------------------------------------------------------------------------------------------------------------------------------------------------------------------------------------------------------------------------------------------------------------------------------------------------------------------------------------------------------------------------------------------|--------------------|---------------------------------------------------------------------------------------------------------------------------------------------|--|
|                   |    | (c) <i>Cohort study</i> - summarise follow-up time (e.g., average and total amount)                                                                                                                                                                                                                                                                                                                             |                    |                                                                                                                                             |  |
| Outcome data      | 15 | <i>Cohort study</i> - Report numbers of outcome events or summary measures over time<br><i>Case-control study</i> - Report numbers in each exposure category, or summary measures of exposure<br><i>Cross-sectional study</i> - Report numbers of outcome events or summary measures                                                                                                                            | Pages 9 and 10     |                                                                                                                                             |  |
| Main results      | 16 | (a) Give unadjusted estimates and, if applicable, confounder-adjusted estimates and their precision (e.g., 95% confidence interval). Make clear which confounders were adjusted for and why they were included<br>(b) Report category boundaries when continuous variables were categorized<br>(c) If relevant, consider translating estimates of relative risk into absolute risk for a meaningful time period | Page 10-12         |                                                                                                                                             |  |
| Other analyses    | 17 | Report other analyses done— e.g., analyses of subgroups and interactions, and sensitivity analyses                                                                                                                                                                                                                                                                                                              | Supplementary data |                                                                                                                                             |  |
| <b>Discussion</b> |    |                                                                                                                                                                                                                                                                                                                                                                                                                 |                    |                                                                                                                                             |  |
| Key results       | 18 | Summarise key results with reference to study objectives                                                                                                                                                                                                                                                                                                                                                        | Page 13            |                                                                                                                                             |  |
| Limitations       | 19 | Discuss limitations of the study, taking into account sources of potential bias or imprecision.                                                                                                                                                                                                                                                                                                                 | Pages 14 and 15    | RECORD 19.1: Discuss the implications of using data that were not created or collected to answer the specific research question(s). Include |  |

|                                                           |    |                                                                                                                                                                            |                 |                                                                                                                                                              |  |
|-----------------------------------------------------------|----|----------------------------------------------------------------------------------------------------------------------------------------------------------------------------|-----------------|--------------------------------------------------------------------------------------------------------------------------------------------------------------|--|
|                                                           |    | Discuss both direction and magnitude of any potential bias                                                                                                                 |                 | discussion of misclassification bias, unmeasured confounding, missing data, and changing eligibility over time, as they pertain to the study being reported. |  |
| Interpretation                                            | 20 | Give a cautious overall interpretation of results considering objectives, limitations, multiplicity of analyses, results from similar studies, and other relevant evidence | Pages 13 and 14 |                                                                                                                                                              |  |
| Generalisability                                          | 21 | Discuss the generalisability (external validity) of the study results                                                                                                      | Page 14         |                                                                                                                                                              |  |
| <b>Other Information</b>                                  |    |                                                                                                                                                                            |                 |                                                                                                                                                              |  |
| Funding                                                   | 22 | Give the source of funding and the role of the funders for the present study and, if applicable, for the original study on which the present article is based              | Page 16         |                                                                                                                                                              |  |
| Accessibility of protocol, raw data, and programming code |    | ..                                                                                                                                                                         | NA              | RECORD 22.1: Authors should provide information on how to access any supplemental information such as the study protocol, raw data, or programming code.     |  |

\*Reference: Benchimol EI, Smeeth L, Guttman A, Harron K, Moher D, Petersen I, Sørensen HT, von Elm E, Langan SM, the RECORD Working Committee. The REporting of studies Conducted using Observational Routinely-collected health Data (RECORD) Statement. *PLoS Medicine* 2015; in press.

\*Checklist is protected under Creative Commons Attribution ([CC BY](https://creativecommons.org/licenses/by/4.0/)) license.

# BMJ Open

## The timing of respiratory virus molecular testing in emergency departments and its association with patient care outcomes: A retrospective observational study across six Australian hospitals

|                                 |                                                                                                                                                                                                                                                                                                                                                                                                                                                                                                                                                                                                                                                                                                                                                                                                                                                                                                                                                                                                       |
|---------------------------------|-------------------------------------------------------------------------------------------------------------------------------------------------------------------------------------------------------------------------------------------------------------------------------------------------------------------------------------------------------------------------------------------------------------------------------------------------------------------------------------------------------------------------------------------------------------------------------------------------------------------------------------------------------------------------------------------------------------------------------------------------------------------------------------------------------------------------------------------------------------------------------------------------------------------------------------------------------------------------------------------------------|
| Journal:                        | <i>BMJ Open</i>                                                                                                                                                                                                                                                                                                                                                                                                                                                                                                                                                                                                                                                                                                                                                                                                                                                                                                                                                                                       |
| Manuscript ID                   | bmjopen-2019-030104.R2                                                                                                                                                                                                                                                                                                                                                                                                                                                                                                                                                                                                                                                                                                                                                                                                                                                                                                                                                                                |
| Article Type:                   | Research                                                                                                                                                                                                                                                                                                                                                                                                                                                                                                                                                                                                                                                                                                                                                                                                                                                                                                                                                                                              |
| Date Submitted by the Author:   | 06-Jun-2019                                                                                                                                                                                                                                                                                                                                                                                                                                                                                                                                                                                                                                                                                                                                                                                                                                                                                                                                                                                           |
| Complete List of Authors:       | Wabe, Nasir; Macquarie University, Centre for Health Systems and Safety Research, Australian Institute of Health Innovation<br>Li, Ling; Macquarie University, Centre for Health Systems and Safety Research, Australian Institute of Health Innovation<br>Dahm, Maria; Macquarie University, Centre for Health Systems and Safety Research, Australian Institute of Health Innovation<br>Lindeman, Robert; NSW Health Pathology<br>Yimsung, Ruth; NSW Health Pathology<br>Clezy, Kate; Prince of Wales Hospital, Infectious Diseases Department<br>Thomas, Judith; Macquarie University, Centre for Health Systems and Safety Research, Australian Institute of Health Innovation<br>Varndell, Wayne ; Prince of Wales Hospital<br>Westbrook, Johanna; Macquarie University, Centre for Health Systems and Safety Research, Australian Institute of Health Innovation<br>Georgiou, A; Macquarie University, Centre for Health Systems and Safety Research, Australian Institute of Health Innovation |
| <b>Primary Subject Heading</b>: | Infectious diseases                                                                                                                                                                                                                                                                                                                                                                                                                                                                                                                                                                                                                                                                                                                                                                                                                                                                                                                                                                                   |
| Secondary Subject Heading:      | Emergency medicine, Diagnostics                                                                                                                                                                                                                                                                                                                                                                                                                                                                                                                                                                                                                                                                                                                                                                                                                                                                                                                                                                       |
| Keywords:                       | Diagnostic microbiology < INFECTIOUS DISEASES, Infection control < INFECTIOUS DISEASES, Molecular diagnostics < INFECTIOUS DISEASES                                                                                                                                                                                                                                                                                                                                                                                                                                                                                                                                                                                                                                                                                                                                                                                                                                                                   |
|                                 |                                                                                                                                                                                                                                                                                                                                                                                                                                                                                                                                                                                                                                                                                                                                                                                                                                                                                                                                                                                                       |

SCHOLARONE™  
Manuscripts

1  
2  
3 **The timing of respiratory virus molecular testing in emergency departments and its**  
4 **association with patient care outcomes: A retrospective observational study across six**  
5 **Australian hospitals**  
6  
7  
8  
9

10 **Authors:** Nasir Wabe<sup>1\*</sup>, Ling Li<sup>1</sup>, Mary R Dahm<sup>1</sup>, Robert Lindeman<sup>2</sup>, Ruth Yimsung<sup>2</sup>, Kate  
11 Clezy<sup>3</sup>, Judith Thomas<sup>1</sup>, Wayne Varndell<sup>4,5</sup>, Johanna I Westbrook<sup>1</sup>, Andrew Georgiou<sup>1</sup>  
12  
13  
14  
15

16 **Authors Affiliations:**  
17  
18

19 <sup>1</sup>Centre for Health Systems and Safety Research, Australian Institute of Health Innovation,  
20 Macquarie University, North Ryde NSW 2109, Australia;  
21  
22

23 <sup>2</sup>NSW Health Pathology, Chatswood NSW 2067, Australia;  
24  
25

26 <sup>3</sup>Infectious Diseases Department, Prince of Wales Hospital, Randwick NSW 2031, Australia;  
27  
28

29 <sup>4</sup>Emergency Department, Prince of Wales Hospital, Randwick NSW 2031, Australia;  
30  
31

32 <sup>5</sup>Faculty of Health, University of Technology Sydney, Australia  
33  
34

35 **\*Corresponding Author**  
36  
37

38 **Address:** Centre for Health Systems and Safety Research, Australian Institute of Health  
39 Innovation, Macquarie University, North Ryde NSW 2109, Australia  
40  
41

42 **T:** +61 (2) 9850 2442 | **M:** + 61 470 771 915  
43  
44

45 **F:** +61 (2) 9850 2499 | **E:** [nasir.wabe@mq.edu.au](mailto:nasir.wabe@mq.edu.au)  
46  
47

48 **Running Title:** The timing of respiratory virus testing and patient outcomes in ED  
49  
50

51 **Key words:** Influenza, timing of testing, rapid PCR, molecular diagnostics, respiratory virus  
52  
53

54 **Word count:** 2,654  
55  
56

57 **Word count abstract:** 278  
58  
59

60 **Total number of figures and table:** 4 tables and 1 figure

## Abstract

**Objective:** A rapid molecular diagnostic test (RMDT) offers a fast and accurate detection of respiratory viruses, but its impact on the timeliness of care in the emergency department (ED) may depend on the timing of the test. The aim of the study was to determine if the timing of respiratory virus testing using a RMDT in the ED had an association with patient care outcomes.

**Design:** Retrospective observational study.

**Setting:** Linked ED and laboratory data from six EDs in New South Wales, Australia.

**Participants:** Adult patients presenting to EDs during the 2017 influenza season and tested for respiratory viruses using a RMDT. The timing of respiratory virus testing was defined as the time from a patient's ED arrival to time of sample receipt at the hospital laboratory.

**Outcome measures:** ED length of stay (LOS), >4-hour ED LOS and having a pending RMDT result at ED disposition.

**Results:** A total of 2168 patients were included. The median timing of respiratory virus testing was 224 minutes (inter-quartile range, 133-349). Every 30-minute increase in the timing of respiratory virus testing was associated with a 24.0-minute increase in the median ED LOS (95% confidence interval [CI], 21.8-26.1;  $P < 0.001$ ), a 51% increase in the likelihood of staying >4 hours in ED (odds ratio [OR], 1.51; 95% CI, 1.41-1.63;  $P < 0.001$ ) and a 4% increase in the likelihood of having a pending RMDT result at ED disposition (OR, 1.04; 95% CI, 1.02-1.05;  $P < 0.001$ ) after adjustment for confounders.

**Conclusion:** The timing of respiratory virus molecular testing in EDs was significantly associated with a range of outcome indicators. Results suggest the potential to maximise the benefits of RMDT by introducing an early diagnostic protocol such as triage-initiated testing.

### Strengths and limitations of this study

- This is the first study to investigate the relationship between the timing of respiratory virus molecular testing and outcomes of patients presenting to ED with respiratory infections.
- This is a large multicentre study that involved six hospitals, enhancing the generalizability of our findings.
- Our findings may not be applicable to paediatric populations as this study did not include patients aged  $\leq 18$  years.
- Being an observational study, our findings do not imply a causal relationship.
- Our analyses were not adjusted for other relevant factors (e.g. access block) which may have confounded the findings of this study.



## Introduction

The accurate diagnosis of the cause of respiratory infections has over recent years depended on a molecular method using a multiplex polymerase chain reaction (PCR) panel testing. Multiplex PCR provides accurate diagnoses, but has been traditionally performed in a central laboratory with a lengthy test turnaround time (TAT), and with major repercussions for the efficiency of emergency department (ED) workflows and care processes.

ED overcrowding has been recognized as a growing problem in Australia and worldwide, contributing to deficits in the performance of the health system.<sup>1-3</sup> Delay in laboratory test results is often considered as one of many factors contributing to ED overcrowding and prolonged ED length of stay (LOS).<sup>4-6</sup> Fast result availability through the use of rapid diagnostic tests can potentially improve patient flow and lessen the burden of ED overcrowding.<sup>7,8</sup> Optimising patient flow is of particular importance given the 4-hour ED LOS target introduced in Australia in 2011 to improve the quality and timeliness of care across EDs.<sup>9</sup>

Diagnostic kits for the rapid diagnosis of respiratory viruses using a molecular PCR-based technology are now available for use in hospital-based laboratories. Existing evidence shows that RMDT in ED is associated with a significant decrease in hospital admissions<sup>8,10</sup>, shorter TAT<sup>8</sup> and reductions in hospital resource utilisation.<sup>11-13</sup> However, evidence of the association between RMDT and ED LOS have been inconsistent.<sup>8,14,15</sup> Our previous study did not detect a significant association between RMDT use and ED LOS.<sup>16</sup> We hypothesised that this may be due to the fact that RMDT ordering took place a median of three hrs after a patient's ED arrival<sup>16</sup> suggesting that the impact of RMDT on ED LOS and other timeliness of care processes may depend on the timing of the test.

The aim of the study was to determine if the timing of respiratory virus testing using RMDT in ED is associated with indicators related to timeliness of patient care including ED LOS,

meeting the 4-hr ED LOS Australian emergency access target; having a pending RMDT result at ED disposition.

## Method

### Setting

A retrospective observational study was conducted across six public hospitals in New South Wales (NSW), Australia. All study sites provide 24-hour EDs: three principal referral hospitals (EDs A, B and D) with 76,228, 54,443 and 61,348 annual ED presentations respectively, two acute group A hospitals (ED C and ED F) with 50,025 and 38,039 annual ED presentations respectively and one public acute group A hospital (ED E) with 29,479 annual ED presentations (2016 data).<sup>17</sup>

### Population

The study period was the 2017 influenza season, between 1 July and 31 October. The inclusion criteria were patients presenting to EDs with symptoms of respiratory infection and aged  $\geq 18$  years; Australasian triage scale categories of 3 (potentially life-threatening), 4 (potentially serious) or 5 (less urgent) and tested for respiratory viruses at a hospital-based laboratory using a RMDT. The RMDT used in this study was a Cepheid Xpert® Flu/RSV XC (Cepheid, Sunnyvale, CA)<sup>16 18</sup>. The Cepheid Xpert® Flu/RSV XC assay demonstrated a high sensitivity and specificity for rapid detection of influenza A, influenza B and RSV.<sup>19</sup>

Patients with triage categories of 1 (immediately life-threatening) or 2 (imminently life-threatening) were excluded from the current analysis as patients required urgent medical assessment and treatment. Relevant patient presentation characteristics and laboratory test data were obtained by linking the ED and laboratory information system datasets.<sup>6</sup>

### Outcome measures

1  
2  
3 The primary outcome was ED LOS. ED LOS was defined as the length of time between ED  
4 arrival and patient disposition. The secondary outcomes included >4-hour ED LOS and having  
5 a pending RMDT result at ED disposition. A pending test result was defined as the  
6 unavailability of a verified RMDT result at the time of patient disposition from the ED.<sup>20</sup>  
7  
8  
9  
10  
11  
12

### 13 **Statistical analysis**

14  
15  
16 Descriptive statistics including medians with inter-quartile ranges (IQR) were reported. The  
17 RMDT TAT was defined as the time of sample receipt at the hospital laboratory to time of  
18 availability of RMDT result. The exploratory variable was the timing of respiratory virus  
19 testing using a RMDT, defined as the time from a patient's ED arrival to time of sample receipt  
20 at the hospital laboratory. For result interpretation purposes, the relationship between the  
21 timing of the RMDT and study outcomes were estimated for every 30-minute increase in the  
22 timing of the test.  
23  
24  
25  
26  
27  
28  
29  
30  
31  
32

33 The association between the timing of the RMDT and ED LOS was assessed using a median  
34 regression. As the ED LOS data were highly skewed, commonly used approaches such as  
35 ordinary least squares regression which models the conditional mean of the outcome variable  
36 was not appropriate methods.<sup>21</sup> Median regression is a special type of quantile regression which  
37 estimates the median of the outcome variable conditional on the values of the predictor  
38 variables.<sup>22</sup> It is robust to extreme values and therefore well suited for modelling such data.<sup>23</sup>  
39  
40  
41  
42  
43  
44  
45  
46

47 Binary logistic regression was used to assess the association between the timing of the RMDT  
48 and the secondary outcomes (e.g. >4-hour ED LOS, *yes/no*). The strength of the associations  
49 was measured using odds ratio (OR) with a 95% confidence interval (CI).  
50  
51  
52  
53

54 For all outcomes, the findings were reported for the overall sample and by study ED. Sub-  
55 group analyses by patient disposition and ED arrival time were also conducted. The baseline  
56 covariates included age, gender, triage category, arrival time, arrival day of week, mode of  
57  
58  
59  
60

1  
2  
3 arrival, patient disposition, overall number of tests ordered and number of test order episodes  
4  
5 (tests ordered at one point in time during the ED stay). All analyses were adjusted for potential  
6  
7 confounders – any variable having a significant association with a given outcome in a  
8  
9 univariate analysis ( $P < 0.05$ ) was selected for the multivariate model. P-values were 2-tailed  
10  
11 and  $P < 0.05$  was considered statistically significant. Analyses were conducted using Stata  
12  
13 version 15 (StataCorp LP, College Station, TX).  
14  
15

### 16 17 **Patient and public involvement**

18  
19 This study was conducted without patient and public involvement as it was a retrospective  
20  
21 study conducted using pre-existing administrative data. The patients were not invited to  
22  
23 comment on the study design and were not consulted to develop outcomes or interpret the  
24  
25 results. Patients were not invited to contribute to the writing or editing of this document for  
26  
27 readability or accuracy.  
28  
29  
30  
31

### 32 33 **Results**

#### 34 35 **Baseline characteristics**

36  
37 A total of 2,168 patients were included in the study. Table 1 presents baseline characteristics.  
38  
39 The median patient age was 74 years and 55.2% (n=1,196) were female (Table 1). Overall,  
40  
41 there were 16,321 pathology tests ordered (i.e. RMDT and other tests combined) with medians  
42  
43 of 3 test order episodes during the ED stay and 7 tests per patient. Analysis of RMDT results  
44  
45 showed that 28.9% (n=626) were positive for either influenza A/B (n=617) or RSV (n=9). No  
46  
47 patients tested positive for both influenza and RSV. The overall median TAT of RMDT was  
48  
49 183 minutes but this ranged from 104 minutes at ED A to 622 minutes at ED F.  
50  
51  
52  
53  
54

55  
56 **Table 1: Baseline characteristics.**

| Variables | Result (N=2,168) |
|-----------|------------------|
|-----------|------------------|

|                              |              |
|------------------------------|--------------|
| Gender, n (%)                |              |
| Male                         | 972 (44.8)   |
| Female                       | 1,196 (55.2) |
| Age (years), median (IQR)    | 74 (56-84)   |
| Triage scale, n (%)          |              |
| Category 3                   | 1,777 (82.0) |
| Category 4/5                 | 391(18.0)    |
| Arrival time, n (%)          |              |
| 0700hrs to 1900hrs           | 1,528 (70.5) |
| 1900hrs to 0700hrs           | 640 (29.5)   |
| Arrival day of week, n (%)   |              |
| Monday                       | 356 (16.4)   |
| Tuesday                      | 294 (13.6)   |
| Wednesday                    | 327 (15.1)   |
| Thursday                     | 300 (13.8)   |
| Friday                       | 308 (14.2)   |
| Saturday                     | 257 (11.9)   |
| Sunday                       | 326 (15.0)   |
| Mode of arrival, n (%)       |              |
| Private/public transport     | 906 (41.8)   |
| State ambulance <sup>1</sup> | 1,262 (58.2) |
| Study ED, n (%)              |              |
| A                            | 723 (33.4)   |
| B                            | 193 (8.9)    |

|                                     |              |
|-------------------------------------|--------------|
| C                                   | 301 (13.9)   |
| D                                   | 530 (24.5)   |
| E                                   | 239 (11.0)   |
| F                                   | 182 (8.4)    |
| Patient disposition, n (%)          |              |
| Admitted                            | 1,567 (72.3) |
| Discharged                          | 545 (25.1)   |
| Other <sup>2</sup>                  | 56 (2.6)     |
| Test order episode, median (IQR)    | 3 (2-4)      |
| Overall tests ordered, median (IQR) | 7 (5-9)      |
| Test result, n (%)                  |              |
| Positive                            | 626 (28.9)   |
| Negative                            | 1,542 (71.1) |

ED, Emergency Department; <sup>1</sup>Fifteen patients arriving by either wheelchair, correctional services vehicle, helicopter rescue service or walked-in were combined with 'State ambulance'; <sup>2</sup>Transferred to another hospital or left ED at own risk.

### The timing of respiratory virus testing

The median time from ED presentation to respiratory virus testing using the RMDT for all samples was 224 minutes (IQR, 133-349). There was considerable variation in the median time to RMDT across EDs which ranged from 173 minutes (IQR, 108-264) at ED B to 269 minutes (IQR, 178-444) at ED F (Figure 1).

### Study outcomes

The overall median ED LOS was 533 minutes. ED B had the shortest and ED D had the longest median ED LOS. Overall, 88% (n=1,907) of patients stayed >4 hours in ED (range across EDs:

78.2% at ED B to 92.0% at ED A). RMDT results were pending for 38% (n=824) of patients at the time of ED disposition (range across EDs: 15.1% at ED A to 70.7% at ED E) (Table 2).

**Table 2: Summary of study outcomes.**

| ED      | N     | Primary outcome                  | Secondary outcomes       |                                              |
|---------|-------|----------------------------------|--------------------------|----------------------------------------------|
|         |       | ED LOS (minute),<br>Median (IQR) | >4-hour ED LOS,<br>N (%) | Patient with a pending<br>RMDT result, N (%) |
| A       | 723   | 545 (358-953)                    | 665 (92.0)               | 109 (15.1)                                   |
| B       | 193   | 376 (257-549)                    | 151 (78.2)               | 80 (41.5)                                    |
| C       | 301   | 490 (342-859)                    | 263 (87.4)               | 157 (52.2)                                   |
| D       | 530   | 714 (366-1172)                   | 457 (86.2)               | 186 (35.1)                                   |
| E       | 239   | 455 (336-657)                    | 208 (87.0)               | 169 (70.7)                                   |
| F       | 182   | 700 (389-1177)                   | 163 (89.6)               | 123 (67.6)                                   |
| Overall | 2,168 | 533 (338.5-975)                  | 1,907 (88.0)             | 824 (38.0)                                   |

ED, Emergency Department; LOS, Length of Stay.

### **The association between the timing of respiratory virus testing and primary outcome**

The results of univariate analysis describing the association between baseline characteristics and each study outcome are presented in *Supplementary Table 1*. All baseline variables except arrival day of week and test result were significantly associated with ED LOS (Table S1).

The timing of respiratory virus testing was strongly associated with ED LOS. After adjustment for potential confounders, every 30-minute increase in the time to RMDT was associated with a 24.0-minute increase in the median ED LOS (95% CI, 21.8-26.1;  $P<0.001$ ). There were no major differences, in this association, by ED (Table 3).

**Table 3: Median regression showing association between the timing of respiratory virus testing (every 30-minute increase) and ED LOS (minutes).**

| ED      | N     | Unadjusted       | Adjusted <sup>†</sup> |
|---------|-------|------------------|-----------------------|
|         |       | Coef. (95% CI)   | Coef. (95% CI)        |
| A       | 723   | 26.4 (22.2-30.5) | 21.6 (16.5-26.7)      |
| B       | 193   | 32.4 (27.1-37.7) | 26.4 (20.0-32.8)      |
| C       | 301   | 30.9 (26.4-35.4) | 26.7 (22.3-31.2)      |
| D       | 530   | 31.7 (26.1-37.3) | 21.7 (17.7-25.8)      |
| E       | 239   | 25.8 (21.0-30.7) | 26.3 (21.5-31.0)      |
| F       | 182   | 28.0 (19.8-36.1) | 23.2 (14.6-31.8)      |
| Overall | 2,168 | 29.4 (27.5-31.2) | 24.0 (21.8-26.1)      |

All analyses were highly significant with a *P*-value of <0.001. The coefficient indicates the median change in a given outcome (e.g. ED LOS) for every 30-minute increase in the timing of the RMDT. <sup>†</sup>Adjusted for gender, age, triage category, ED arrival time, mode of arrival, study ED, patient disposition, test order episode. ED, Emergency Department; LOS, Length of Stay.

A subgroup analysis by patient disposition and ED arrival time is shown in *Supplementary Table 2*. The association was more pronounced among patients who were subsequently discharged than for admitted patients and among patients who arrived to EDs between 0700hrs to 1900hrs than for patients arriving between 1900hrs to 0700hrs (Table S2).

### **The association between the timing of respiratory virus testing and secondary outcomes**

The median time to RMDT was 113 minutes (IQR, 76-152) for patients with  $\leq 4$  hours ED LOS (n=261) and 250 minutes (IQR, 153-370) for patients staying >4 hours in ED (n=1,907). The median time to RMDT was 211 minutes (IQR, 122-336) for patients who received RMDT results before disposition (n=1,344) and 247 minutes (IQR, 151-364) for patients with pending RMDT results at disposition (n=824). Of the patients with pending RMDT results, the results of 30.3% (n=250) eventually came back positive for either influenza A/B or RSV.

The results of binary logistic regression are presented in Table 4 and show associations between the time to RMDT and secondary outcomes. The time to RMDT was positively associated with



both secondary outcomes. In the adjusted model, for every 30-minute increase in time to RMDT, the likelihood of staying >4 hours in ED (*versus* having ≤4 hours ED LOS) increased by a factor of 1.51 (OR, 1.51; 95% CI, 1.41-1.63;  $P<0.001$ ). This is equivalent to a 51% increase in the likelihood of staying >4 hours in ED.

The association between the timing of the RMDT and having a pending test result at ED disposition was not as striking as with other outcomes. In the total sample, for every 30-minute increase in the time to RMDT, the likelihood of experiencing a pending RMDT result at ED disposition increased by a factor of 1.04 – a 4% increase – (OR, 1.04; 95% CI, 1.02-1.05;  $P<0.001$ ) after adjustment for potential confounders. When the analysis was conducted separately by study EDs, the association was not statistically significant for EDs C, D and E (Table 4).

**Table 4: Binary logistic regression showing association between the timing of respiratory virus testing (every 30- minute increase) and secondary outcomes.**

| ED      | N     | > 4-hr ED LOS    |                       | Patient with a pending RMDT result |                                |
|---------|-------|------------------|-----------------------|------------------------------------|--------------------------------|
|         |       | Unadjusted       | Adjusted <sup>†</sup> | Unadjusted                         | Adjusted <sup>††</sup>         |
|         |       | OR (95% CI)      | OR (95% CI)           | OR (95% CI)                        | OR (95% CI)                    |
| A       | 723   | 1.58 (1.37-1.82) | 1.51 (1.28-1.79)      | 1.04 (1.01-1.07)                   | 1.06 (1.03-1.10)               |
| B       | 193   | 1.74 (1.41-2.14) | 1.70 (1.34-2.17)      | 1.06 (1.01-1.12)                   | 1.16 (1.07-1.25)               |
| C       | 301   | 1.51 (1.29-1.76) | 1.48 (1.25-1.75)      | 0.99 (0.96-1.02) <sup>NS</sup>     | 1.02 (0.99-1.06) <sup>NS</sup> |
| D       | 530   | 1.69 (1.48-1.93) | 1.64 (1.41-1.90)      | 0.99 (0.97-1.01) <sup>NS</sup>     | 1.02 (1.00-1.05) <sup>NS</sup> |
| E       | 239   | 1.40 (1.21-1.61) | 1.39 (1.19-1.63)      | 1.00 (0.96-1.04) <sup>NS</sup>     | 1.02 (0.97-1.07) <sup>NS</sup> |
| F       | 182   | 1.63 (1.28-2.07) | 1.90 (1.24-2.91)      | 1.01 (0.98-1.05) <sup>NS</sup>     | 1.05 (1.00-1.09)               |
| Overall | 2,168 | 1.54 (1.45-1.64) | 1.51 (1.41-1.63)      | 1.02 (1.01-1.03)                   | 1.04 (1.02-1.05)               |

1  
2  
3 All analyses, except those marked 'NS', were significant with a *P-value* of <0.05. The coefficient indicates the  
4 likelihood of a given outcome for every 30-minute increase in the timing of the RMDT. †Adjusted for age, triage  
5 category, mode of arrival, study ED, patient disposition, test order episode and test result. ††Adjusted for gender,  
6 age, triage category, mode of arrival, study ED, patient disposition, test order episode. ED, Emergency  
7 Department; NS, Not Significant.  
8  
9  
10  
11

## 12 **Discussion**

### 13 ***Key findings***

14  
15  
16  
17  
18 The major finding of this study is that for every 30-minute increase in the time from ED arrival  
19 until respiratory virus testing there was a 24.0-minute increase in the median ED LOS.  
20  
21 Moreover, an increase in the timing of respiratory virus testing was associated with a greater  
22 likelihood of experiencing an ED LOS greater than four hours and having a pending RMDT  
23 result at the time of disposition from the ED.  
24  
25  
26  
27  
28

### 29 ***Interpretation and comparison with existing literature***

30  
31  
32  
33 Previous studies have also reported a significant association between ED LOS and the time  
34 taken to obtain the results from laboratory testing in EDs.<sup>6 24-26</sup> However, unlike our study, the  
35 previous studies have been conducted in a context of broader patient populations visiting ED  
36 and, therefore, direct comparisons with other studies are not possible. For example, Li *et al.*  
37 conducted a retrospective study that included 123,455 ED presentations for all conditions  
38 across four EDs in NSW, Australia. That study assessed the relationship between ED LOS and  
39 TAT and found a 17-minute increase in ED LOS for each 30-minute increase in TAT.<sup>6</sup> In a  
40 recent large US study, Kaushik *et al.* evaluated the impact of reducing laboratory TAT on ED  
41 LOS using data from 486 hospitals with 4,483,169 ED presentations.<sup>25</sup> In that study, a 1-minute  
42 decrease in TAT was associated with a 0.50-minute decrease in ED LOS.<sup>25</sup> In another US  
43 study, Kocher *et al.* investigated the effect of diagnostic testing and treatment patterns on ED  
44 LOS using data from a large national study that included approximately 360 million ED  
45  
46  
47  
48  
49  
50  
51  
52  
53  
54  
55  
56  
57  
58  
59  
60

1  
2  
3 presentations.<sup>26</sup> They found that, the ordering of a blood test was the most time consuming  
4 testing modality resulting in an adjusted marginal effect of a 72-minute increase in ED LOS  
5 and the likelihood of experiencing a >4-hour ED LOS increased by a factor of 2.29.<sup>26</sup>  
6  
7

8  
9  
10 The present study revealed a direct relationship between the timing of respiratory virus testing  
11 and a range of indicators of timeliness of patient care in ED. Delays in the ordering of RMDT  
12 had a negative impact on our selected ED outcomes. Our results suggest that earlier initiative  
13 of RMDT may result in reduced ED LOS. More systemic or procedural changes in the way  
14 healthcare is delivered (e.g. introduction of an early diagnostic testing protocol such as a triage-  
15 initiated testing) may be needed in order to maximise its benefits. Triage-based testing  
16 protocols have been shown to reduce wait times and ED LOS, decrease costs, reduces time to  
17 receiving medications and improve patient satisfaction in other conditions.<sup>27-29</sup> In an  
18 randomized controlled trial conducted in the US that including more than 1000 ED patients  
19 aged <3years, influenza testing at triage using a non-molecular antigen-based method led to  
20 significantly shorter ED LOS.<sup>30</sup> Future research should assess the potential impact of triage-  
21 initiated ordering of RMDT for patients presenting to ED with suspected respiratory viral  
22 infection on patient outcomes including the effect on ED LOS.  
23  
24  
25  
26  
27  
28  
29  
30  
31  
32  
33  
34  
35  
36  
37  
38  
39  
40

### 41 ***Implications of the study***

42  
43  
44 The current study showed that a delay in respiratory virus testing was associated with an  
45 increased likelihood of having a pending test result at ED disposition. The test results of 30.3%  
46 of patients with pending test results eventually came back positive for either influenza A/B or  
47 RSV. This finding has significant patient safety implications. Pending test results at discharge  
48 are less likely to be followed-up and may lead to missed or delayed diagnosis and increased  
49 hospital representations.<sup>31 32</sup> From an infection transmission perspective, patients who were  
50  
51  
52  
53  
54  
55  
56  
57  
58  
59  
60

1  
2  
3 discharged with pending results could potentially spread the infection, especially if appropriate  
4 management was not provided.  
5  
6  
7

### 8 ***Strengths and weaknesses of the study***

9

10  
11 Our study has some strengths. To the best of our knowledge, this is the first study to explore  
12 the relationship between the timing of respiratory virus molecular testing and ED outcomes  
13 among patients presenting with respiratory infections. Another strength of the study was that it  
14 is a multicentre study that involved six hospitals with a large sample size, enhancing the  
15 external validity (generalizability) of our findings.  
16  
17

18  
19 The findings of the current study should be interpreted in the context of the following  
20 methodological limitations. Firstly, this study was conducted among adult patients (age>18  
21 years). Given the impact of RMDT on ED LOS can be different among patients aged≤18 years  
22 <sup>33</sup>, our findings may not be applicable to paediatric populations. Secondly, being an  
23 observational study, the findings of the current study do not imply a causal relationship.  
24  
25 Thirdly, our analyses were not adjusted for other factors which may have confounded the  
26 findings of this study. The input-throughput-output model <sup>34</sup> is commonly used in studies  
27 assessing factors affecting LOS and ED overcrowding.<sup>26 35 36</sup> Input factors are characteristics  
28 that contribute to the demand for ED services (e.g. patient demographics and ED presentation  
29 characteristics).<sup>34</sup> Throughput factors are characteristics related to ED care such as diagnostic  
30 evaluations and treatment.<sup>26 34</sup> Output factors are organisational or hospital capacity-related  
31 characteristics (e.g. access block).<sup>34 36</sup> Whilst our multivariable models were adjusted for a  
32 number of input variables, our current analysis did not consider the effect of several throughput  
33 and output/organisational factors due to lack of data. Previous studies have shown that  
34 throughput factors such as diagnostic imaging <sup>26</sup>, clinical assessment <sup>37</sup> and treatment  
35 (administering a medication or performing a procedure) <sup>26</sup> and output/organisational factors <sup>36</sup>  
36  
37  
38  
39  
40  
41  
42  
43  
44  
45  
46  
47  
48  
49  
50  
51  
52  
53  
54  
55  
56  
57  
58  
59  
60

1  
2  
3 38 39 are important factors influencing ED LOS. Finally, the current study did not consider the  
4  
5 appropriateness of RMDT ordering practices. Reducing inappropriate or unnecessary  
6  
7 respiratory virus testing could also have a considerable impact on reducing ED LOS.  
8  
9

## 10 **Conclusion**

11  
12  
13 The timing of respiratory virus molecular testing in EDs was significantly associated with a  
14  
15 range of outcome indicators. Results suggest the potential to maximise the benefits of RMDT  
16  
17 by introducing an early diagnostic protocol such as a triage-initiated testing which warrants  
18  
19 investigations in future studies.  
20  
21  
22

23  
24 **Patient consent for publication:** Not required.  
25

26  
27 **Contributors:** AG, LL, MRD, RL, JT and JIW conceived the study and obtained research  
28  
29 funding. NW, LL, MRD, RL, RY, KC, JT, WV, JIW and AG have made substantial  
30  
31 contributions to the design of the study. NW and LL conducted data extraction, cleaning,  
32  
33 linkage and analysis. NW, LL, MRD, RL, KC, JT, JIW and AG involved in the interpretation  
34  
35 of the results with input from RY and WV. NW, LL, MRD, JT and AG contributed to the  
36  
37 drafting of the manuscript with input from RL, RY, KC and WV. All authors involved in the  
38  
39 critical revision of the manuscript for important intellectual content as well as approved the  
40  
41 final version to be published.  
42  
43  
44

45  
46 **Funding:** This work was supported by National Health and Medical Research Council of  
47  
48 Australia Partnership Project Grant [grant number, APP1111925].  
49

50  
51 **Ethical approval:** Ethics approval was granted by the Human Research Ethics Committee of  
52  
53 the South Eastern Sydney Local Health District (HREC/16/POWH/412).  
54

55  
56 **Conflicts of interests:** None declared.  
57  
58  
59  
60

1  
2  
3 **Data sharing statement:** The data that underline the results reported in this articles are  
4 available from the data custodians (South Eastern Sydney and Illawarra Shoalhaven Local  
5 Health District), but restrictions apply to the availability of these data, which were used under  
6 license for the current study, and so are not publicly available. The de-identified data however  
7 may be obtained from the corresponding author upon reasonable request and with permission  
8 of the data custodians.  
9  
10  
11  
12  
13  
14  
15  
16

## 17 **References**

- 18  
19  
20  
21 1. Wickman L, Svensson P, Djarv T. Effect of crowding on length of stay for common chief  
22 complaints in the emergency department: A STROBE cohort study. *Medicine*  
23 2017;96(44):e8457. doi: 10.1097/md.00000000000008457 [published Online First:  
24 2017/11/03]  
25  
26  
27  
28  
29
- 30 2. Sikka R, Mehta S, Kaucky C, et al. ED crowding is associated with an increased time to  
31 pneumonia treatment. *Am J Emerg Med* 2010;28(7):809-12. doi:  
32 10.1016/j.ajem.2009.06.023 [published Online First: 2010/09/15]  
33  
34  
35  
36
- 37 3. Morley C, Unwin M, Peterson GM, et al. Emergency department crowding: A systematic  
38 review of causes, consequences and solutions. *PLoS One* 2018;13(8):e0203316. doi:  
39 10.1371/journal.pone.0203316 [published Online First: 2018/08/31]  
40  
41  
42  
43
- 44 4. Lewandrowski K. POC testing in the emergency department: Strategies to improve clinical  
45 and operational outcomes. Radiometer Medical ApS, 2700 Brønshøj, Denmark.:  
46 acutecaretesting.org.; 2011 [Available from: [https://acutecaretesting.org/-](https://acutecaretesting.org/-/media/acutecaretesting/files/pdf/poc-testing-in-the-emergency-department-strategies-to-improve-clinical-and-operational-outcomes.pdf)  
47 [/media/acutecaretesting/files/pdf/poc-testing-in-the-emergency-department-strategies-](https://acutecaretesting.org/-/media/acutecaretesting/files/pdf/poc-testing-in-the-emergency-department-strategies-to-improve-clinical-and-operational-outcomes.pdf)  
48 [to-improve-clinical-and-operational-outcomes.pdf](https://acutecaretesting.org/-/media/acutecaretesting/files/pdf/poc-testing-in-the-emergency-department-strategies-to-improve-clinical-and-operational-outcomes.pdf). accessed 30 January 2019.  
49  
50  
51  
52  
53  
54
- 55 5. Pines JM, Hilton JA, Weber EJ, et al. International perspectives on emergency department  
56 crowding. *Academic emergency medicine : official journal of the Society for*  
57  
58  
59  
60

- 1  
2  
3 *Academic Emergency Medicine* 2011;18(12):1358-70. doi: 10.1111/j.1553-  
4 2712.2011.01235.x [published Online First: 2011/12/16]  
5  
6  
7  
8 6. Li L, Georgiou A, Vecellio E, et al. The effect of laboratory testing on emergency  
9 department length of stay: a multihospital longitudinal study applying a cross-  
10 classified random-effect modeling approach. *Academic emergency medicine : official*  
11 *journal of the Society for Academic Emergency Medicine* 2015;22(1):38-46. doi:  
12 10.1111/acem.12565 [published Online First: 2015/01/08]  
13  
14  
15  
16  
17  
18  
19 7. Rooney KD, Schilling UM. Point-of-care testing in the overcrowded emergency  
20 department—can it make a difference? *Critical Care* 2014;18(6):692.  
21  
22  
23  
24 8. Rappo U, Schuetz AN, Jenkins SG, et al. Impact of Early Detection of Respiratory Viruses  
25 by Multiplex PCR Assay on Clinical Outcomes in Adult Patients. *Journal of clinical*  
26 *microbiology* 2016;54(8):2096-103. doi: 10.1128/jcm.00549-16 [published Online  
27 First: 2016/05/27]  
28  
29  
30  
31  
32  
33 9. Sullivan C, Staib A, Khanna S, et al. The National Emergency Access Target (NEAT) and  
34 the 4-hour rule: time to review the target. *The Medical journal of Australia*  
35 2016;204(9):354.  
36  
37  
38  
39  
40 10. Linehan E, Brennan M, O'Rourke S, et al. Impact of introduction of xpert flu assay for  
41 influenza PCR testing on obstetric patients: a quality improvement project. *The*  
42 *journal of maternal-fetal & neonatal medicine : the official journal of the European*  
43 *Association of Perinatal Medicine, the Federation of Asia and Oceania Perinatal*  
44 *Societies, the International Society of Perinatal Obstet* 2018;31(8):1016-20. doi:  
45 10.1080/14767058.2017.1306048 [published Online First: 2017/03/14]  
46  
47  
48  
49  
50  
51  
52  
53  
54 11. Ko F, Drews SJ. The impact of commercial rapid respiratory virus diagnostic tests on  
55 patient outcomes and health system utilization. *Expert Review of Molecular*  
56 *Diagnostics* 2017;17(10):917-31. doi: 10.1080/14737159.2017.1372195  
57  
58  
59  
60

- 1  
2  
3  
4  
5  
6  
7  
8  
9  
10  
11  
12  
13  
14  
15  
16  
17  
18  
19  
20  
21  
22  
23  
24  
25  
26  
27  
28  
29  
30  
31  
32  
33  
34  
35  
36  
37  
38  
39  
40  
41  
42  
43  
44  
45  
46  
47  
48  
49  
50  
51  
52  
53  
54  
55  
56  
57  
58  
59  
60
12. Poehling KA, Zhu Y, Tang YW, et al. Accuracy and impact of a point-of-care rapid influenza test in young children with respiratory illnesses. *Archives of pediatrics & adolescent medicine* 2006;160(7):713-8. doi: 10.1001/archpedi.160.7.713 [published Online First: 2006/07/05]
  13. Blaschke AJ, Shapiro DJ, Pavia AT, et al. A National Study of the Impact of Rapid Influenza Testing on Clinical Care in the Emergency Department. *Journal of the Pediatric Infectious Diseases Society* 2014;3(2):112-8. doi: 10.1093/jpids/pit071 [published Online First: 2014/05/30]
  14. Jeong HW, Heo JY, Park JS, et al. Effect of the influenza virus rapid antigen test on a physician's decision to prescribe antibiotics and on patient length of stay in the emergency department. *PLoS One* 2014;9(11):e110978. doi: 10.1371/journal.pone.0110978 [published Online First: 2014/11/07]
  15. Doan Q, Enarson P, Kissoon N, et al. Rapid viral diagnosis for acute febrile respiratory illness in children in the Emergency Department. *The Cochrane database of systematic reviews* 2014(9):Cd006452. doi: 10.1002/14651858.CD006452.pub4 [published Online First: 2014/09/16]
  16. Wabe N, Li L, Lindeman R, et al. The impact of rapid molecular diagnostic testing for respiratory viruses on outcomes for emergency department patients. *The Medical journal of Australia* 2019;210(7):316-20. doi: 10.5694/mja2.50049 [published Online First: 2019/03/07]
  17. Dahm MR, Georgiou A, Westbrook JI, et al. Delivering safe and effective test-result communication, management and follow-up: a mixed-methods study protocol. *BMJ open* 2018;8(2):e020235. doi: 10.1136/bmjopen-2017-020235 [published Online First: 2018/02/17]



- 1  
2  
3 18. Wabe N, Li L, Lindeman R, et al. Impact of Rapid Molecular Diagnostic Testing of  
4  
5 Respiratory Viruses on Outcomes of Adults Hospitalized with Respiratory Illness: a  
6  
7 Multicenter Quasi-experimental Study. *Journal of clinical microbiology*  
8  
9 2019;57(4):e01727-18. doi: 10.1128/JCM.01727-18  
10  
11  
12 19. Arbefeville S, Thonen-Kerr E, Ferrieri P. Prospective and Retrospective Evaluation of the  
13  
14 Performance of the FDA-Approved Cepheid Xpert Flu/RSV XC Assay. *Lab Med*  
15  
16 2017;48(4):e53-e56. doi: 10.1093/labmed/lmx038 [published Online First:  
17  
18 2017/10/17]  
19  
20  
21 20. Wabe N, Li L, Sezgin G, et al. Pending Laboratory Test Results at the Time of Discharge:  
22  
23 A 3-Year Retrospective Comparison of Paper Versus Electronic Test Ordering in  
24  
25 Three Emergency Departments. *Studies in health technology and informatics*  
26  
27 2018;252:164-69. [published Online First: 2018/07/25]  
28  
29  
30  
31 21. Le Cook B, Manning WG. Thinking beyond the mean: a practical guide for using quantile  
32  
33 regression methods for health services research. *Shanghai archives of psychiatry*  
34  
35 2013;25(1):55-9. doi: 10.3969/j.issn.1002-0829.2013.01.011 [published Online First:  
36  
37 2013/02/01]  
38  
39  
40 22. McGreevy KM, Lipsitz SR, Linder JA, et al. Using median regression to obtain adjusted  
41  
42 estimates of central tendency for skewed laboratory and epidemiologic data. *Clinical*  
43  
44 *chemistry* 2009;55(1):165-9. doi: 10.1373/clinchem.2008.106260 [published Online  
45  
46 First: 2008/11/26]  
47  
48  
49 23. Lee AH, Fung WK, Fu B. Analyzing hospital length of stay: mean or median regression?  
50  
51 *Medical care* 2003;41(5):681-6. doi: 10.1097/01.Mlr.0000062550.23101.6f  
52  
53 [published Online First: 2003/04/30]  
54  
55  
56  
57  
58  
59  
60

- 1  
2  
3 24. Holland LL, Smith LL, Blick KE. Reducing laboratory turnaround time outliers can  
4  
5 reduce emergency department patient length of stay: an 11-hospital study. *American*  
6  
7 *journal of clinical pathology* 2005;124(5):672-74.  
8  
9
- 10 25. Kaushik N, Khangulov VS, O'Hara M, et al. Reduction in laboratory turnaround time  
11  
12 decreases emergency room length of stay. *Open access emergency medicine: OAEM*  
13  
14 2018;10:37.  
15  
16
- 17 26. Kocher KE, Meurer WJ, Desmond JS, et al. Effect of testing and treatment on emergency  
18  
19 department length of stay using a national database. *Academic emergency medicine :*  
20  
21 *official journal of the Society for Academic Emergency Medicine* 2012;19(5):525-34.  
22  
23 doi: 10.1111/j.1553-2712.2012.01353.x [published Online First: 2012/05/19]  
24  
25
- 26 27. Wiler JL, Gentle C, Halfpenny JM, et al. Optimizing emergency department front-end  
27  
28 operations. *Annals of emergency medicine* 2010;55(2):142-60.e1. doi:  
29  
30 10.1016/j.annemergmed.2009.05.021 [published Online First: 2009/06/27]  
31  
32
- 33 28. Oredsson S, Jonsson H, Rognes J, et al. A systematic review of triage-related  
34  
35 interventions to improve patient flow in emergency departments. *Scandinavian*  
36  
37 *journal of trauma, resuscitation and emergency medicine* 2011;19:43. doi:  
38  
39 10.1186/1757-7241-19-43 [published Online First: 2011/07/21]  
40  
41
- 42 29. Barksdale AN, Hackman JL, Williams K, et al. ED triage pain protocol reduces time to  
43  
44 receiving analgesics in patients with painful conditions. *Am J Emerg Med*  
45  
46 2016;34(12):2362-66. doi: 10.1016/j.ajem.2016.08.051 [published Online First:  
47  
48 2016/09/25]  
49  
50
- 51 30. Abanses JC, Dowd MD, Simon SD, et al. Impact of rapid influenza testing at triage on  
52  
53 management of febrile infants and young children. *Pediatric emergency care*  
54  
55 2006;22(3):145-9. [published Online First: 2006/04/22]  
56  
57  
58  
59  
60

- 1  
2  
3 31. Callen J, Georgiou A, Li J, et al. The safety implications of missed test results for  
4  
5 hospitalised patients: a systematic review. *BMJ quality & safety* 2011;20(2):194-9.  
6  
7 doi: 10.1136/bmjqs.2010.044339 [published Online First: 2011/02/09]  
8  
9
- 10 32. Roy CL, Poon EG, Karson AS, et al. Patient safety concerns arising from test results that  
11  
12 return after hospital discharge. *Annals of internal medicine* 2005;143(2):121-8.  
13  
14 [published Online First: 2005/07/20]  
15  
16
- 17 33. Wabe N, Li L, Lindeman R, et al. Association of rapid molecular diagnostic testing of  
18  
19 respiratory viruses with emergency department patient and laboratory outcomes: A  
20  
21 before-after study. *Medical Journal of Australia* 2018;In press (accepted 12  
22  
23 November 2018)  
24  
25
- 26 34. Asplin BR, Magid DJ, Rhodes KV, et al. A conceptual model of emergency department  
27  
28 crowding. *Annals of emergency medicine* 2003;42(2):173-80. doi:  
29  
30 10.1067/mem.2003.302 [published Online First: 2003/07/29]  
31  
32
- 33 35. Doupe M, Chateau D, Derksen S, et al. Factors affecting emergency department waiting  
34  
35 room times in Winnipeg: Manitoba Centre for Health Policy, University of Manitoba  
36  
37 2017.  
38  
39
- 40 36. Bashkin O, Caspi S, Haligoa R, et al. Organizational factors affecting length of stay in the  
41  
42 emergency department: initial observational study. *Israel journal of health policy*  
43  
44 *research* 2015;4:38. doi: 10.1186/s13584-015-0035-6 [published Online First:  
45  
46 2015/10/17]  
47  
48
- 49 37. Yoon P, Steiner I, Reinhardt G. Analysis of factors influencing length of stay in the  
50  
51 emergency department. *Cjem* 2003;5(3):155-61. [published Online First: 2007/05/03]  
52  
53
- 54 38. Forero R, McCarthy S, Hillman K. Access block and emergency department  
55  
56 overcrowding. *Critical care (London, England)* 2011;15(2):216. doi: 10.1186/cc9998  
57  
58 [published Online First: 2011/04/05]  
59  
60

- 1  
2  
3 39. Fatovich DM, Nagree Y, Sprivulis P. Access block causes emergency department  
4  
5 overcrowding and ambulance diversion in Perth, Western Australia. *Emergency*  
6  
7 *Medicine Journal* 2005;22(5):351-54. doi: 10.1136/emj.2004.018002  
8  
9  
10  
11  
12  
13  
14  
15  
16  
17  
18  
19  
20  
21  
22  
23  
24  
25  
26  
27  
28  
29  
30  
31  
32  
33  
34  
35  
36  
37  
38  
39  
40  
41  
42  
43  
44  
45  
46  
47  
48  
49  
50  
51  
52  
53  
54  
55  
56  
57  
58  
59  
60

For peer review only

### Figure's Legend

**Figure 1: The time to RMDT by study EDs:** Boxes represent the IQR (25<sup>th</sup> and 75<sup>th</sup> percentiles) with the median (50<sup>th</sup> percentile) value within the boxes, the mean value is represented as a '+' and the capped bars represent the 10<sup>th</sup> and 90<sup>th</sup> percentiles. The broken line indicates the overall median time to RMDT.

For peer review only

1  
2  
3  
4  
5  
6  
7  
8  
9  
10  
11  
12  
13  
14  
15  
16  
17  
18  
19  
20  
21  
22  
23  
24  
25  
26  
27  
28  
29  
30  
31  
32  
33  
34  
35  
36  
37  
38  
39  
40  
41  
42  
43  
44  
45  
46  
47  
48  
49  
50  
51  
52  
53  
54  
55  
56  
57  
58  
59  
60

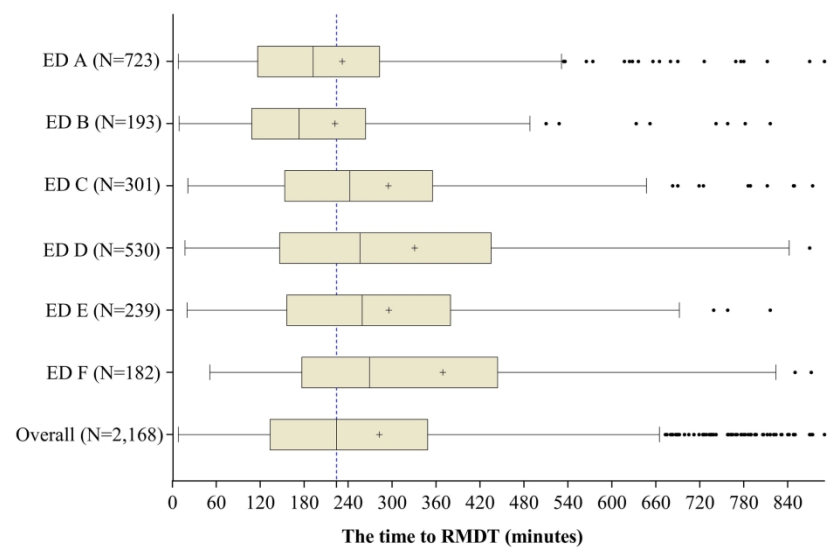

Figure 1: The time to RMDT by study EDs: Boxes represent the IQR (25th and 75th percentiles) with the median (50th percentile) value within the boxes, the mean value is represented as a '+' and the capped bars represent the 10th and 90th percentiles. The broken line indicates the overall median time to RMDT.

214x124mm (300 x 300 DPI)

## Supplementary Data

Table S1: Univariate analysis showing variables associated with primary and secondary outcomes (N=2,168).

| Variables                                 | ED LOS<br>(min)                 | > 4-hr ED LOS                  | Patient with a pending RMDT<br>result |
|-------------------------------------------|---------------------------------|--------------------------------|---------------------------------------|
|                                           | Coef. (95% CI)                  | OR (95% CI)                    | OR (95% CI)                           |
| Female vs. Male                           | -75 (-119.6 to -30.4)           | 0.82 (0.63-1.07) <sup>NS</sup> | 1.26 (1.06-1.51)                      |
| Age (for every 10-year increase)          | 51.2 (40.5 to 61.9)             | 1.38 (1.3-1.46)                | 0.86 (0.82-0.90)                      |
| Triage                                    |                                 |                                |                                       |
| Semi-urgent vs. Urgent                    | -123 (-179.8 to -66.2)          | 0.43 (0.32-0.58)               | 1.66 (1.33-2.07)                      |
| Arrival time                              |                                 |                                |                                       |
| 0700hrs to 1900hrs vs. 1900hrs to 0700hrs | -188 (-233.6 to -142.4)         | 0.75 (0.56-1.01) <sup>NS</sup> | 0.97 (0.80-1.17) <sup>NS</sup>        |
| Arrival day of week                       |                                 |                                |                                       |
| Weekdays vs. Weekends                     | 8 (-39.8 to 55.8) <sup>NS</sup> | 1.06 (0.80-1.42) <sup>NS</sup> | 1.01 (0.83-1.22) <sup>NS</sup>        |
| Mode of arrival                           |                                 |                                |                                       |
| Ambulance vs. private/public transport    | 224 (180.6 to 267.4)            | 3.76 (2.85-4.98)               | 0.63 (0.53-0.76)                      |
| Study ED                                  |                                 |                                |                                       |

|                                               |                                    |                                |                                |
|-----------------------------------------------|------------------------------------|--------------------------------|--------------------------------|
| A                                             | Ref                                | Ref                            | Ref                            |
| B                                             | -169 (-257.7 to -80.3)             | 0.31 (0.20-0.48)               | 3.99 (2.81-5.67)               |
| C                                             | -55 (-130.1 to 20.1) <sup>NS</sup> | 0.60 (0.39-0.93)               | 6.14 (4.53-8.33)               |
| D                                             | 169 (106.4 to 231.6)               | 0.55 (0.38-0.79)               | 3.05 (2.32-3.99)               |
| E                                             | -90 (-171.6 to -8.4)               | 0.59 (0.37-0.93)               | 13.60 (9.63-19.20)             |
| F                                             | 162 (71.3 to 252.7)                | 0.75 (0.43-1.29) <sup>NS</sup> | 11.74 (8.10-17.02)             |
| Patient disposition                           |                                    |                                |                                |
| Discharged vs. Admitted                       | -325 (-380.3 to -269.7)            | 0.17 (0.13-0.22)               | 2.41 (1.97-2.94)               |
| Test order episode                            | 120.6 (109.1 to 132.0)             | 2.58 (2.23-2.99)               | 0.83 (0.79-0.88)               |
| No. of tests (for every 3 more tests ordered) | 167.6 (149.5 to 185.7)             | 3.3 (2.78-3.93)                | 0.85 (0.78-0.92)               |
| Test result                                   |                                    |                                |                                |
| Positive vs. Negative                         | -39 (-85.5 to 7.5) <sup>NS</sup>   | 0.71 (0.54-0.94)               | 1.12 (0.93-1.36) <sup>NS</sup> |

ED, Emergency Department; RMDT, Rapid Molecular Diagnostic Test; LOS, Length of Stay; NS, Not Significant.



**Table S2: Multivariate analysis showing the association between the timing of respiratory virus testing (every 30-min increase) with study outcomes by patient disposition and ED arrival time.**

| Variable            | N     | ED LOS<br>(min) <sup>†</sup> | > 4-hr ED LOS <sup>††</sup> | Patient with a pending RMDT<br>result <sup>†††</sup> |
|---------------------|-------|------------------------------|-----------------------------|------------------------------------------------------|
|                     |       | Coef. (95% CI)               | OR (95% CI)                 | OR (95% CI)                                          |
| Patient disposition |       |                              |                             |                                                      |
| Discharged          | 545   | 28.0 (25.6-30.4)             | 1.68 (1.48-1.91)            | 1.09 (1.03-1.14)                                     |
| Admitted            | 1,567 | 22.3 (19.4-25.2)             | 1.44 (1.32-1.58)            | 1.04 (1.02-1.05)                                     |
| ED arrival time     |       |                              |                             |                                                      |
| 0700hrs to 1900hrs  | 1,528 | 26.6 (24.3-29.0)             | 1.49 (1.37-1.62)            | 1.03 (1.01-1.04)                                     |
| 1900hrs to 0700hrs  | 640   | 17.8 (13.4-22.0)             | 1.58 (1.37-1.81)            | 1.06 (1.03-1.09)                                     |

All analyses were significant with a *P-value* of <0.001. ED, Emergency Department; RMDT, Rapid Molecular Diagnostic Test; LOS, Length of Stay; <sup>†</sup>Adjusted for gender, age, triage category, mode of arrival, study ED, test order episode; <sup>††</sup>Adjusted for age, arrival day of week, mode of arrival, study ED and test order episode; <sup>†††</sup>Adjusted for gender, age, triage category, mode of arrival, study ED and test order episode.

**The RECORD statement – checklist of items, extended from the STROBE statement, that should be reported in observational studies using routinely collected health data.**

|                           | Item No. | STROBE items                                                                                                                                                                               | Location in manuscript where items are reported | RECORD items                                                                                                                                                                                                                                                                                                                                                                                                                                | Location in manuscript where items are reported                                    |
|---------------------------|----------|--------------------------------------------------------------------------------------------------------------------------------------------------------------------------------------------|-------------------------------------------------|---------------------------------------------------------------------------------------------------------------------------------------------------------------------------------------------------------------------------------------------------------------------------------------------------------------------------------------------------------------------------------------------------------------------------------------------|------------------------------------------------------------------------------------|
| <b>Title and abstract</b> |          |                                                                                                                                                                                            |                                                 |                                                                                                                                                                                                                                                                                                                                                                                                                                             |                                                                                    |
|                           | 1        | (a) Indicate the study's design with a commonly used term in the title or the abstract (b) Provide in the abstract an informative and balanced summary of what was done and what was found | a=page 1<br>b=page 2                            | RECORD 1.1: The type of data used should be specified in the title or abstract. When possible, the name of the databases used should be included.<br><br>RECORD 1.2: If applicable, the geographic region and timeframe within which the study took place should be reported in the title or abstract.<br><br>RECORD 1.3: If linkage between databases was conducted for the study, this should be clearly stated in the title or abstract. | 1.1=page 2 ('Setting')<br><br>1.2=page 2 ('Setting')<br><br>1.3=page 2 ('Setting') |
| <b>Introduction</b>       |          |                                                                                                                                                                                            |                                                 |                                                                                                                                                                                                                                                                                                                                                                                                                                             |                                                                                    |
| Background rationale      | 2        | Explain the scientific background and rationale for the investigation being reported                                                                                                       | Page 4                                          |                                                                                                                                                                                                                                                                                                                                                                                                                                             |                                                                                    |
| Objectives                | 3        | State specific objectives, including any prespecified hypotheses                                                                                                                           | Pages 4 and 5                                   |                                                                                                                                                                                                                                                                                                                                                                                                                                             |                                                                                    |
| <b>Methods</b>            |          |                                                                                                                                                                                            |                                                 |                                                                                                                                                                                                                                                                                                                                                                                                                                             |                                                                                    |
| Study Design              | 4        | Present key elements of study design early in the paper                                                                                                                                    | Page 5                                          |                                                                                                                                                                                                                                                                                                                                                                                                                                             |                                                                                    |
| Setting                   | 5        | Describe the setting, locations, and relevant dates, including periods of recruitment, exposure, follow-up, and data collection                                                            | Page 5                                          |                                                                                                                                                                                                                                                                                                                                                                                                                                             |                                                                                    |

|                              |   |                                                                                                                                                                                                                                                                                                                                                                                                                                                                                                                                                                                                                                                                                                                              |         |                                                                                                                                                                                                                                                                                                                                                                                                                                                                                                                                                                                                                                                                                                      |                                                                                                                                                                         |
|------------------------------|---|------------------------------------------------------------------------------------------------------------------------------------------------------------------------------------------------------------------------------------------------------------------------------------------------------------------------------------------------------------------------------------------------------------------------------------------------------------------------------------------------------------------------------------------------------------------------------------------------------------------------------------------------------------------------------------------------------------------------------|---------|------------------------------------------------------------------------------------------------------------------------------------------------------------------------------------------------------------------------------------------------------------------------------------------------------------------------------------------------------------------------------------------------------------------------------------------------------------------------------------------------------------------------------------------------------------------------------------------------------------------------------------------------------------------------------------------------------|-------------------------------------------------------------------------------------------------------------------------------------------------------------------------|
| Participants                 | 6 | <p>(a) <i>Cohort study</i> - Give the eligibility criteria, and the sources and methods of selection of participants. Describe methods of follow-up</p> <p><i>Case-control study</i> - Give the eligibility criteria, and the sources and methods of case ascertainment and control selection. Give the rationale for the choice of cases and controls</p> <p><i>Cross-sectional study</i> - Give the eligibility criteria, and the sources and methods of selection of participants</p> <p>(b) <i>Cohort study</i> - For matched studies, give matching criteria and number of exposed and unexposed</p> <p><i>Case-control study</i> - For matched studies, give matching criteria and the number of controls per case</p> | Page 5. | <p>RECORD 6.1: The methods of study population selection (such as codes or algorithms used to identify subjects) should be listed in detail. If this is not possible, an explanation should be provided.</p> <p>RECORD 6.2: Any validation studies of the codes or algorithms used to select the population should be referenced. If validation was conducted for this study and not published elsewhere, detailed methods and results should be provided.</p> <p>RECORD 6.3: If the study involved linkage of databases, consider use of a flow diagram or other graphical display to demonstrate the data linkage process, including the number of individuals with linked data at each stage.</p> | <p>The study was retrospective observational study as detailed in Page 5</p> <p>Not applicable</p> <p>Separate reference was provided regarding the linkage process</p> |
| Variables                    | 7 | Clearly define all outcomes, exposures, predictors, potential confounders, and effect modifiers. Give diagnostic criteria, if applicable.                                                                                                                                                                                                                                                                                                                                                                                                                                                                                                                                                                                    | Page 6  | RECORD 7.1: A complete list of codes and algorithms used to classify exposures, outcomes, confounders, and effect modifiers should be provided. If these cannot be reported, an explanation should be provided.                                                                                                                                                                                                                                                                                                                                                                                                                                                                                      |                                                                                                                                                                         |
| Data sources/<br>measurement | 8 | For each variable of interest, give sources of data and details of methods of assessment (measurement). Describe comparability of assessment methods if there is more than one group                                                                                                                                                                                                                                                                                                                                                                                                                                                                                                                                         | Page 5  |                                                                                                                                                                                                                                                                                                                                                                                                                                                                                                                                                                                                                                                                                                      |                                                                                                                                                                         |

|                        |    |                                                                                                                                                                                                                                                                                                                                                                                                                                                                                                                                                                                                     |                                                                                  |  |  |
|------------------------|----|-----------------------------------------------------------------------------------------------------------------------------------------------------------------------------------------------------------------------------------------------------------------------------------------------------------------------------------------------------------------------------------------------------------------------------------------------------------------------------------------------------------------------------------------------------------------------------------------------------|----------------------------------------------------------------------------------|--|--|
| Bias                   | 9  | Describe any efforts to address potential sources of bias                                                                                                                                                                                                                                                                                                                                                                                                                                                                                                                                           | Not described directly but effort was made to describe potential confounders     |  |  |
| Study size             | 10 | Explain how the study size was arrived at                                                                                                                                                                                                                                                                                                                                                                                                                                                                                                                                                           | Page 5 –the study included all participants who fulfilled the inclusion criteria |  |  |
| Quantitative variables | 11 | Explain how quantitative variables were handled in the analyses. If applicable, describe which groupings were chosen, and why                                                                                                                                                                                                                                                                                                                                                                                                                                                                       | Pages 5 and 6                                                                    |  |  |
| Statistical methods    | 12 | <p>(a) Describe all statistical methods, including those used to control for confounding</p> <p>(b) Describe any methods used to examine subgroups and interactions</p> <p>(c) Explain how missing data were addressed</p> <p>(d) <i>Cohort study</i> - If applicable, explain how loss to follow-up was addressed</p> <p><i>Case-control study</i> - If applicable, explain how matching of cases and controls was addressed</p> <p><i>Cross-sectional study</i> - If applicable, describe analytical methods taking account of sampling strategy</p> <p>(e) Describe any sensitivity analyses</p> | Pages 5 and 6                                                                    |  |  |

|                                                                                        |                                  |                                                                                     |                                                                                                                                                                                                                                                                                                                        |                                                                                                                                                                                                                                                              |                                                                                                                                                                                                                                                                                                                    |
|----------------------------------------------------------------------------------------|----------------------------------|-------------------------------------------------------------------------------------|------------------------------------------------------------------------------------------------------------------------------------------------------------------------------------------------------------------------------------------------------------------------------------------------------------------------|--------------------------------------------------------------------------------------------------------------------------------------------------------------------------------------------------------------------------------------------------------------|--------------------------------------------------------------------------------------------------------------------------------------------------------------------------------------------------------------------------------------------------------------------------------------------------------------------|
| 1<br>2<br>3<br>4<br>5<br>6<br>7<br>8<br>9                                              | Data access and cleaning methods | .. Separate reference was provided regarding the data cleaning and linkage process. |                                                                                                                                                                                                                                                                                                                        | RECORD 12.1: Authors should describe the extent to which the investigators had access to the database population used to create the study population.<br><br>RECORD 12.2: Authors should provide information on the data cleaning methods used in the study. |                                                                                                                                                                                                                                                                                                                    |
| 10<br>11<br>12<br>13<br>14<br>15<br>16<br>17<br>18                                     | Linkage                          | .. Separate reference was provided regarding the data cleaning and linkage process. |                                                                                                                                                                                                                                                                                                                        | RECORD 12.3: State whether the study included person-level, institutional-level, or other data linkage across two or more databases. The methods of linkage and methods of linkage quality evaluation should be provided.                                    |                                                                                                                                                                                                                                                                                                                    |
| 19                                                                                     | <b>Results</b>                   |                                                                                     |                                                                                                                                                                                                                                                                                                                        |                                                                                                                                                                                                                                                              |                                                                                                                                                                                                                                                                                                                    |
| 20<br>21<br>22<br>23<br>24<br>25<br>26<br>27<br>28<br>29<br>30<br>31<br>32             | Participants                     | 13                                                                                  | (a) Report the numbers of individuals at each stage of the study ( <i>e.g.</i> , numbers potentially eligible, examined for eligibility, confirmed eligible, included in the study, completing follow-up, and analysed)<br>(b) Give reasons for non-participation at each stage.<br>(c) Consider use of a flow diagram | Page 7                                                                                                                                                                                                                                                       | RECORD 13.1: Describe in detail the selection of the persons included in the study ( <i>i.e.</i> , study population selection) including filtering based on data quality, data availability and linkage. The selection of included persons can be described in the text and/or by means of the study flow diagram. |
| 33<br>34<br>35<br>36<br>37<br>38<br>39<br>40<br>41<br>42<br>43<br>44<br>45<br>46<br>47 | Descriptive data                 | 14                                                                                  | (a) Give characteristics of study participants ( <i>e.g.</i> , demographic, clinical, social) and information on exposures and potential confounders<br>(b) Indicate the number of participants with missing data for each variable of interest                                                                        | Pages 7 and 8                                                                                                                                                                                                                                                |                                                                                                                                                                                                                                                                                                                    |

|                   |    |                                                                                                                                                                                                                                                                                                                                                                                                                 |                    |                                                                                                                                             |  |
|-------------------|----|-----------------------------------------------------------------------------------------------------------------------------------------------------------------------------------------------------------------------------------------------------------------------------------------------------------------------------------------------------------------------------------------------------------------|--------------------|---------------------------------------------------------------------------------------------------------------------------------------------|--|
|                   |    | (c) <i>Cohort study</i> - summarise follow-up time (e.g., average and total amount)                                                                                                                                                                                                                                                                                                                             |                    |                                                                                                                                             |  |
| Outcome data      | 15 | <i>Cohort study</i> - Report numbers of outcome events or summary measures over time<br><i>Case-control study</i> - Report numbers in each exposure category, or summary measures of exposure<br><i>Cross-sectional study</i> - Report numbers of outcome events or summary measures                                                                                                                            | Pages 9 and 10     |                                                                                                                                             |  |
| Main results      | 16 | (a) Give unadjusted estimates and, if applicable, confounder-adjusted estimates and their precision (e.g., 95% confidence interval). Make clear which confounders were adjusted for and why they were included<br>(b) Report category boundaries when continuous variables were categorized<br>(c) If relevant, consider translating estimates of relative risk into absolute risk for a meaningful time period | Page 10-12         |                                                                                                                                             |  |
| Other analyses    | 17 | Report other analyses done— e.g., analyses of subgroups and interactions, and sensitivity analyses                                                                                                                                                                                                                                                                                                              | Supplementary data |                                                                                                                                             |  |
| <b>Discussion</b> |    |                                                                                                                                                                                                                                                                                                                                                                                                                 |                    |                                                                                                                                             |  |
| Key results       | 18 | Summarise key results with reference to study objectives                                                                                                                                                                                                                                                                                                                                                        | Page 13            |                                                                                                                                             |  |
| Limitations       | 19 | Discuss limitations of the study, taking into account sources of potential bias or imprecision.                                                                                                                                                                                                                                                                                                                 | Pages 14 and 15    | RECORD 19.1: Discuss the implications of using data that were not created or collected to answer the specific research question(s). Include |  |

|                                                           |    |                                                                                                                                                                            |                 |                                                                                                                                                              |  |
|-----------------------------------------------------------|----|----------------------------------------------------------------------------------------------------------------------------------------------------------------------------|-----------------|--------------------------------------------------------------------------------------------------------------------------------------------------------------|--|
|                                                           |    | Discuss both direction and magnitude of any potential bias                                                                                                                 |                 | discussion of misclassification bias, unmeasured confounding, missing data, and changing eligibility over time, as they pertain to the study being reported. |  |
| Interpretation                                            | 20 | Give a cautious overall interpretation of results considering objectives, limitations, multiplicity of analyses, results from similar studies, and other relevant evidence | Pages 13 and 14 |                                                                                                                                                              |  |
| Generalisability                                          | 21 | Discuss the generalisability (external validity) of the study results                                                                                                      | Page 14         |                                                                                                                                                              |  |
| <b>Other Information</b>                                  |    |                                                                                                                                                                            |                 |                                                                                                                                                              |  |
| Funding                                                   | 22 | Give the source of funding and the role of the funders for the present study and, if applicable, for the original study on which the present article is based              | Page 16         |                                                                                                                                                              |  |
| Accessibility of protocol, raw data, and programming code |    | ..                                                                                                                                                                         | NA              | RECORD 22.1: Authors should provide information on how to access any supplemental information such as the study protocol, raw data, or programming code.     |  |

\*Reference: Benchimol EI, Smeeth L, Guttman A, Harron K, Moher D, Petersen I, Sørensen HT, von Elm E, Langan SM, the RECORD Working Committee. The REporting of studies Conducted using Observational Routinely-collected health Data (RECORD) Statement. *PLoS Medicine* 2015; in press.

\*Checklist is protected under Creative Commons Attribution ([CC BY](https://creativecommons.org/licenses/by/4.0/)) license.
