# Supplementary material for: Timing of respiratory virus molecular testing in emergency departments and its association with patient care outcomes: a retrospective observational study across six Australian hospitals
Source: PubMed Central journal article supplement — BMJ Open. 2019 Aug 8;9(8):e030104. doi: 10.1136/bmjopen-2019-030104 (PMC6701571; doi:10.1136/bmjopen-2019-030104), 2019-08-08
Supplement: bmjopen-2019-030104supp001.pdf [file bmjopen-2019-030104supp001.pdf]

**Supplementary Data**

**Table S1: Univariate analysis showing variables associated with primary and secondary outcomes (N=2,168).**

| Variables                                 | ED LOS<br>(min)                 | > 4-hr ED LOS                  | Patient with a pending RMDT<br>result |
|-------------------------------------------|---------------------------------|--------------------------------|---------------------------------------|
|                                           | Coef. (95% CI)                  | OR (95% CI)                    | OR (95% CI)                           |
| Female vs. Male                           | -75 (-119.6 to -30.4)           | 0.82 (0.63-1.07) <sup>NS</sup> | 1.26 (1.06-1.51)                      |
| Age (for every 10-year increase)          | 51.2 (40.5 to 61.9)             | 1.38 (1.3-1.46)                | 0.86 (0.82-0.90)                      |
| Triage                                    |                                 |                                |                                       |
| Semi-urgent vs. Urgent                    | -123 (-179.8 to -66.2)          | 0.43 (0.32-0.58)               | 1.66 (1.33-2.07)                      |
| Arrival time                              |                                 |                                |                                       |
| 0700hrs to 1900hrs vs. 1900hrs to 0700hrs | -188 (-233.6 to -142.4)         | 0.75 (0.56-1.01) <sup>NS</sup> | 0.97 (0.80-1.17) <sup>NS</sup>        |
| Arrival day of week                       |                                 |                                |                                       |
| Weekdays vs. Weekends                     | 8 (-39.8 to 55.8) <sup>NS</sup> | 1.06 (0.80-1.42) <sup>NS</sup> | 1.01 (0.83-1.22) <sup>NS</sup>        |
| Mode of arrival                           |                                 |                                |                                       |
| Ambulance vs. private/public transport    | 224 (180.6 to 267.4)            | 3.76 (2.85-4.98)               | 0.63 (0.53-0.76)                      |
| Study ED                                  |                                 |                                |                                       |

|                                               |                                    |                                |                                |
|-----------------------------------------------|------------------------------------|--------------------------------|--------------------------------|
| A                                             | Ref                                | Ref                            | Ref                            |
| B                                             | -169 (-257.7 to -80.3)             | 0.31 (0.20-0.48)               | 3.99 (2.81-5.67)               |
| C                                             | -55 (-130.1 to 20.1) <sup>NS</sup> | 0.60 (0.39-0.93)               | 6.14 (4.53-8.33)               |
| D                                             | 169 (106.4 to 231.6)               | 0.55 (0.38-0.79)               | 3.05 (2.32-3.99)               |
| E                                             | -90 (-171.6 to -8.4)               | 0.59 (0.37-0.93)               | 13.60 (9.63-19.20)             |
| F                                             | 162 (71.3 to 252.7)                | 0.75 (0.43-1.29) <sup>NS</sup> | 11.74 (8.10-17.02)             |
| Patient disposition                           |                                    |                                |                                |
| Discharged vs. Admitted                       | -325 (-380.3 to -269.7)            | 0.17 (0.13-0.22)               | 2.41 (1.97-2.94)               |
| Test order episode                            | 120.6 (109.1 to 132.0)             | 2.58 (2.23-2.99)               | 0.83 (0.79-0.88)               |
| No. of tests (for every 3 more tests ordered) | 167.6 (149.5 to 185.7)             | 3.3 (2.78-3.93)                | 0.85 (0.78-0.92)               |
| Test result                                   |                                    |                                |                                |
| Positive vs. Negative                         | -39 (-85.5 to 7.5) <sup>NS</sup>   | 0.71 (0.54-0.94)               | 1.12 (0.93-1.36) <sup>NS</sup> |

ED, Emergency Department; RMDT, Rapid Molecular Diagnostic Test; LOS, Length of Stay; NS, Not Significant.

**Table S2: Multivariate analysis showing the association between the timing of respiratory virus testing (every 30-min increase) with study outcomes by patient disposition and ED arrival time.**

| Variable            | N     | ED LOS<br>(min) <sup>†</sup> | > 4-hr ED LOS <sup>††</sup> | Patient with a pending RMDT<br>result <sup>†††</sup> |
|---------------------|-------|------------------------------|-----------------------------|------------------------------------------------------|
|                     |       | Coef. (95% CI)               | OR (95% CI)                 | OR (95% CI)                                          |
| Patient disposition |       |                              |                             |                                                      |
| Discharged          | 545   | 28.0 (25.6-30.4)             | 1.68 (1.48-1.91)            | 1.09 (1.03-1.14)                                     |
| Admitted            | 1,567 | 22.3 (19.4-25.2)             | 1.44 (1.32-1.58)            | 1.04 (1.02-1.05)                                     |
| ED arrival time     |       |                              |                             |                                                      |
| 0700hrs to 1900hrs  | 1,528 | 26.6 (24.3-29.0)             | 1.49 (1.37-1.62)            | 1.03 (1.01-1.04)                                     |
| 1900hrs to 0700hrs  | 640   | 17.8 (13.4-22.0)             | 1.58 (1.37-1.81)            | 1.06 (1.03-1.09)                                     |

All analyses were significant with a *P-value* of <0.001. ED, Emergency Department; RMDT, Rapid Molecular Diagnostic Test; LOS, Length of Stay; <sup>†</sup>Adjusted for gender, age, triage category, mode of arrival, study ED, test order episode; <sup>††</sup>Adjusted for age, arrival day of week, mode of arrival, study ED and test order episode; <sup>†††</sup>Adjusted for gender, age, triage category, mode of arrival, study ED and test order episode.
